# Supplementary material for: Two-sites are better than one: revisiting the OER mechanism on CoOOH by DFT with electrode polarization
Source: Royal Society of Chemistry journal article supplement (doi:10.1039/d0cp00281j), 2020-01-01
Supplement: d0cp00281j1.pdf [file d0cp00281j1.pdf]

# Two-Sites Are Better Than One: Revisiting the OER Mechanism on CoOOH by DFT with Electrode Polarization.

*Antton Curutchet<sup>1</sup>, Pauline Colinet<sup>1</sup>, Carine Michel<sup>1</sup>, Stephan N. Steinmann<sup>1\*</sup>, Tangui Le Bahers<sup>1\*</sup>*

<sup>1</sup>Univ Lyon, ENS de Lyon, CNRS, Université Lyon 1, Laboratoire de Chimie UMR 5182,  
Lyon, France

## **Corresponding Author**

\* authors for correspondance: [stephan.steinmann@ens-lyon.fr](mailto:stephan.steinmann@ens-lyon.fr), [tangui.le\\_bahers@ens-lyon.fr](mailto:tangui.le_bahers@ens-lyon.fr)

SUPPORTING INFORMATION

## Selection of reaction steps

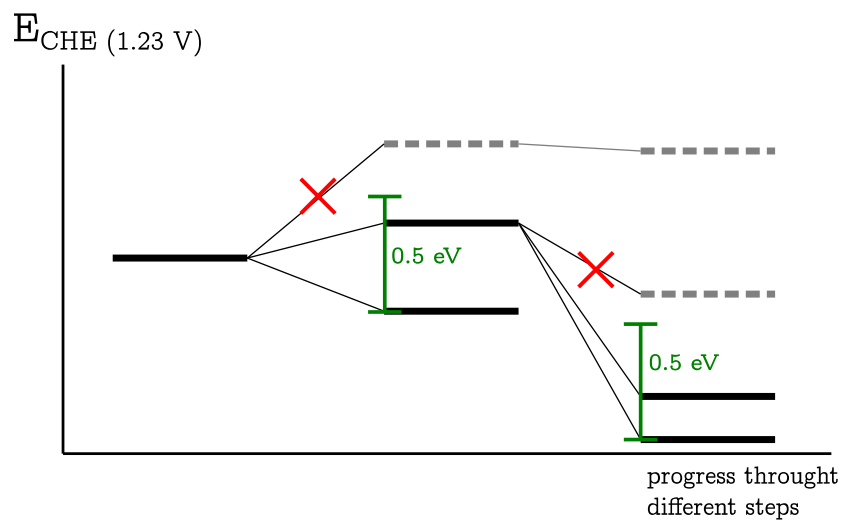

**Figure S1:** Illustration of mechanism selection criterion. 0.5-eV tolerance is represented by green segment.

|                      |                                                                                                                                                                                                |
|----------------------|------------------------------------------------------------------------------------------------------------------------------------------------------------------------------------------------|
| Reference            | 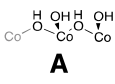 <p><b>A</b></p>                                                                                              |
| 1 site modification  |  <p><b>B B' C C' D D' E E'</b></p>                                                                           |
| 2 sites modification |  <p><b>1 1' 1'' 2 2' 2'' 2''' 3 3' 3'' 3''' 4 4' 4'' 4''' 5 5' 5'' 5''' 6 6' 6'' 6''' 6* (6'*) 6''*</b></p> |
| 3 sites modification |                                                                                                            |

**Table S1:** All intermediates computed. (in brackets, structures that could not be covered in the represented geometry). Labels correspond to the ones used in the main article.

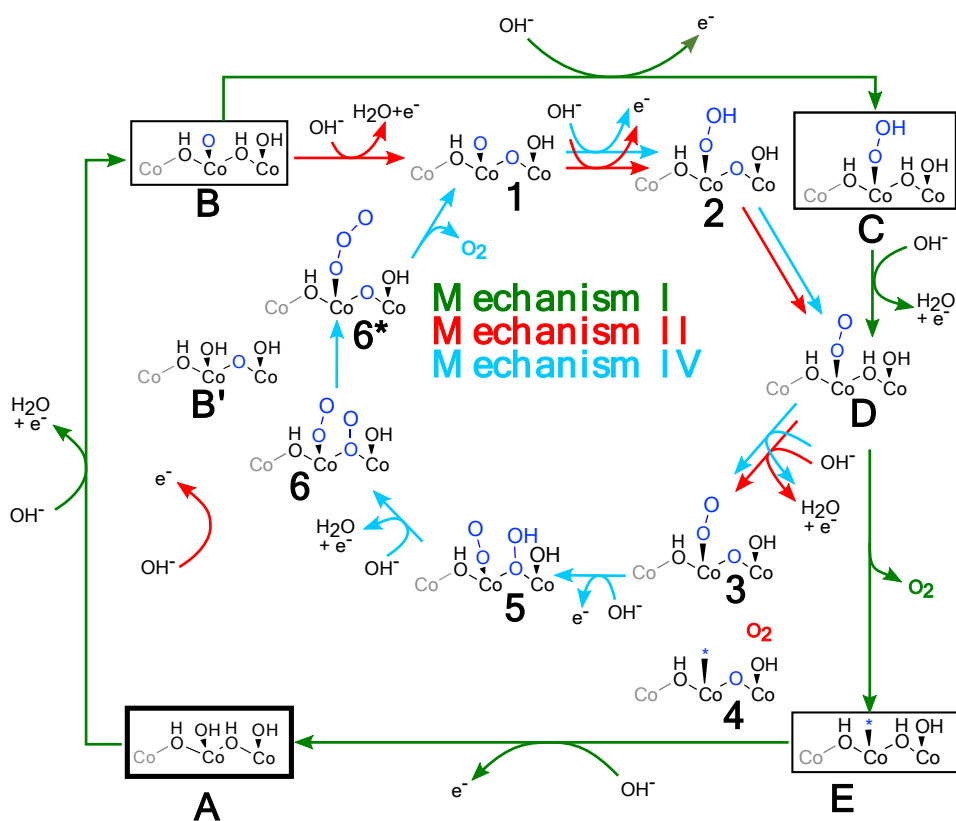

**Figure S2:** Best mechanisms after considering polarization effect and transition states.

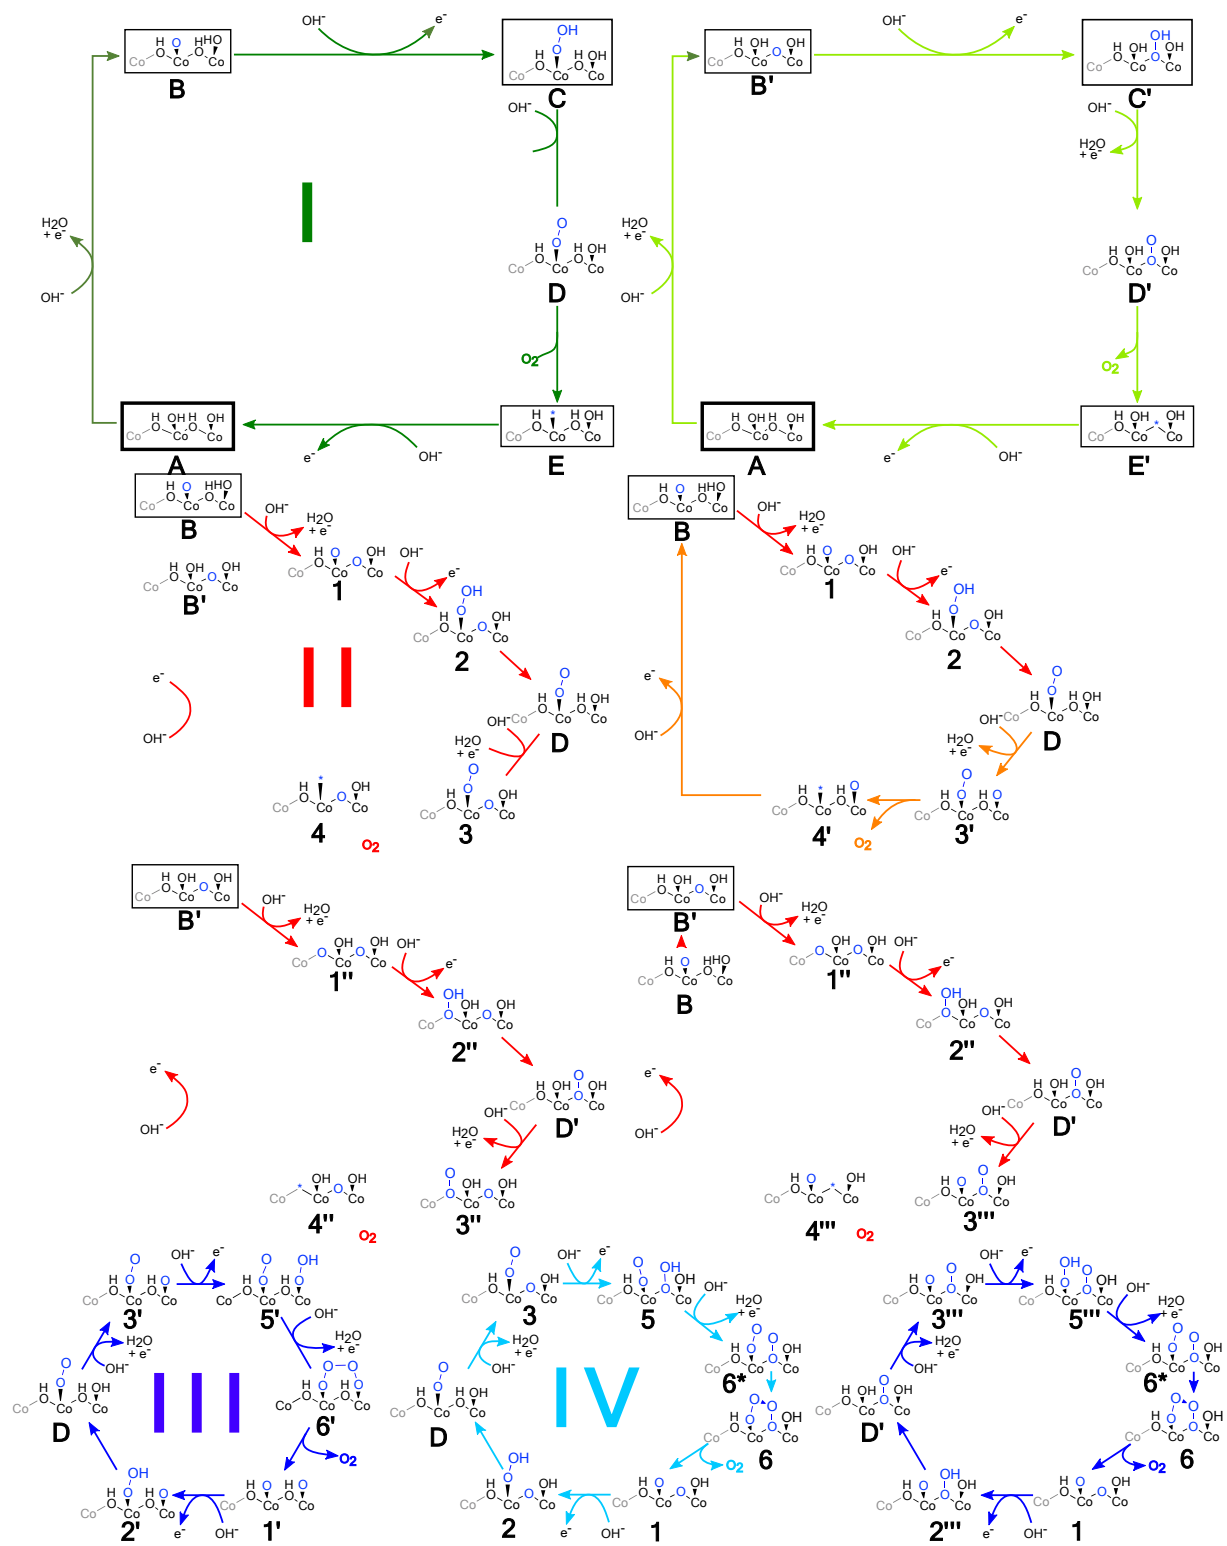

**Figure S3:** Comprehensive scheme of all reaction paths considered in the study. Best mechanisms are shown in Figure 2. The different shade of colours corresponds to the ones used in Figure S4.

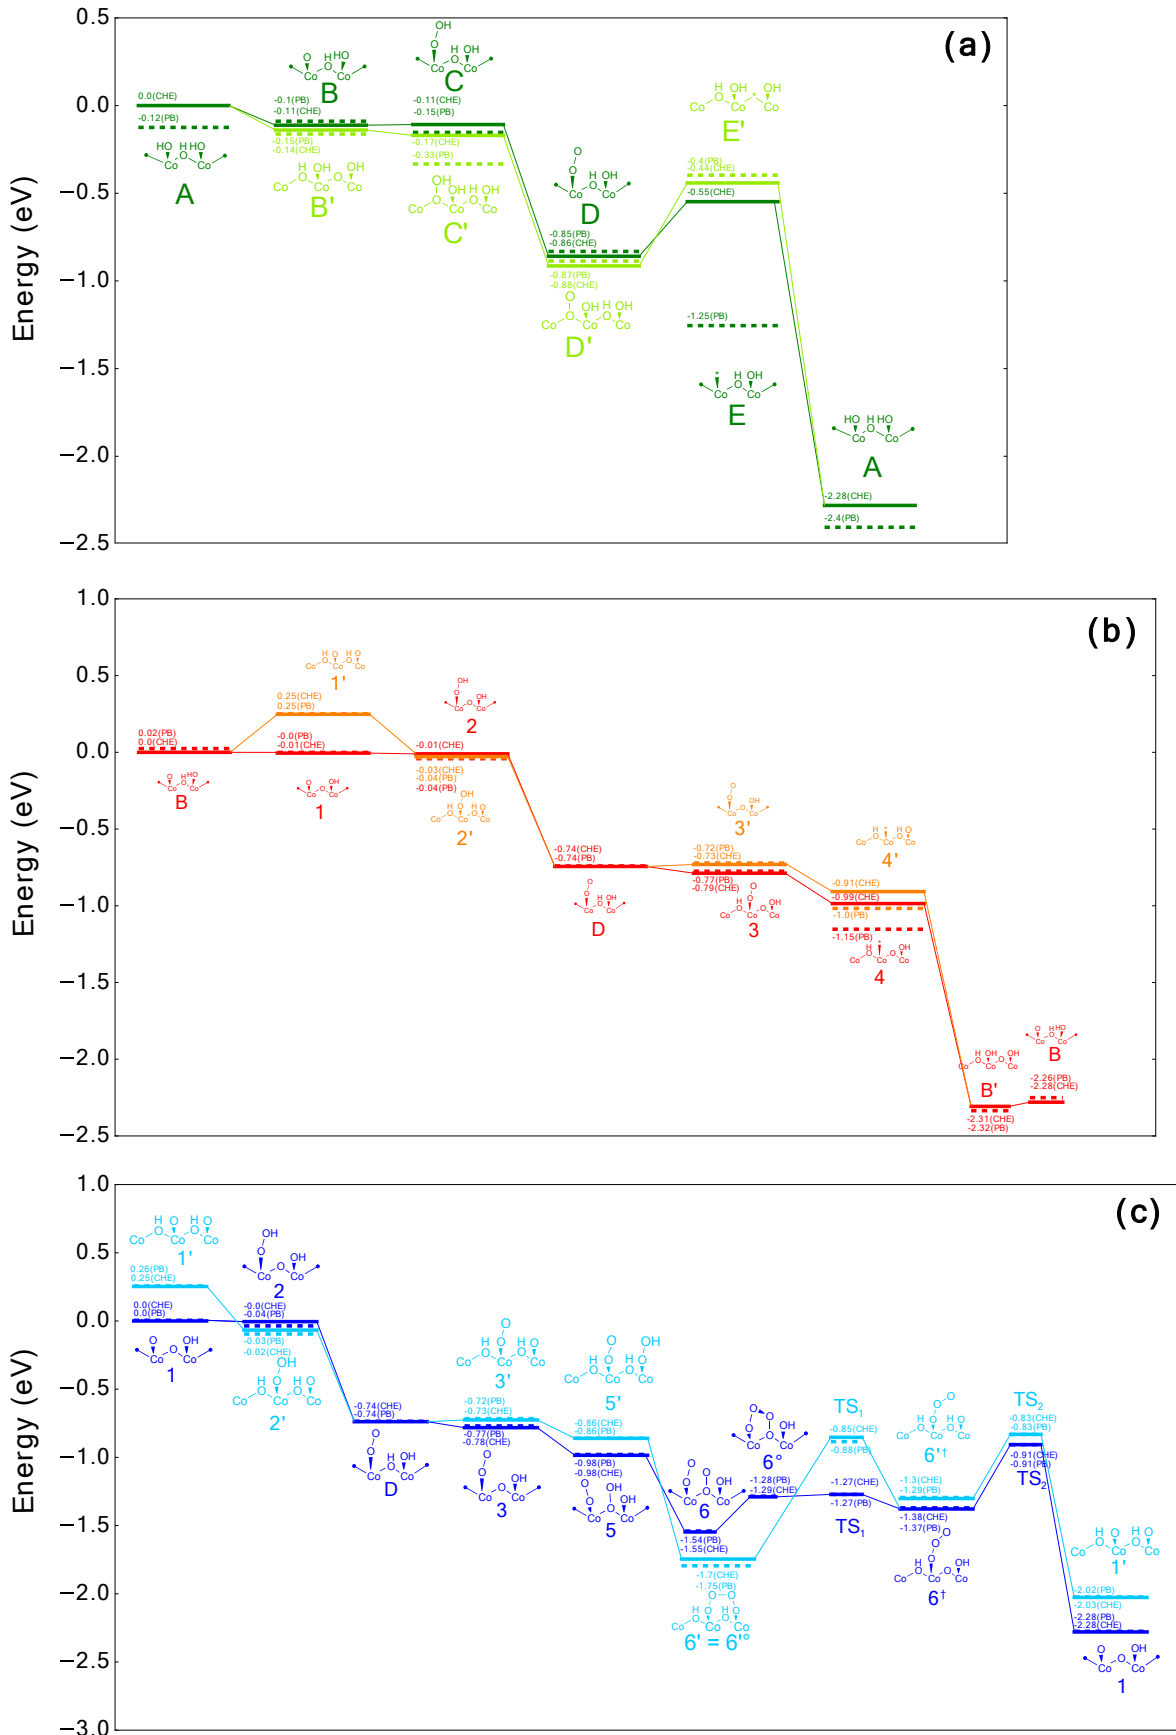

**Figure S4:** Detailed energy profiles and comparison between CHE (plain lines) and PB (dashed lines) approaches, for each mechanism, at 0.57V overpotential. (a), (b) and (c) refer to mechanism I, II and III respectively. Colors correspond to different configurations.

## Transition States

Neglecting the activation barrier of desorption / adsorption reactions is a usual approximation in catalysis. In addition, the barrier of H dissociation and hopping steps have been shown to significantly decrease in water-assisted case<sup>1</sup>. Most of the steps considered involve 1 site adsorption ( $\text{OH}^-$ ) or 1 site desorption ( $\text{H}^+$ ,  $\text{O}_2$ ) thus we assumed no activation barrier associated to these steps. Transition state study was operated only on the 2-sites  $\text{O}_2$  desorption steps. Figure S5 illustrates the geometry of an obtained transition state. For transition states corresponding to 1-site  $\text{O}_2$  desorption, thus corresponding to the escape of  $\text{O}_2$  from the surface, no transition states were computing because it involves a two spin states (associated to an intersystem crossing of singlet oxygen to triplet oxygen) that are extremely difficult to model with a surface containing several Co atoms prone to change easily their spin and oxidations states.

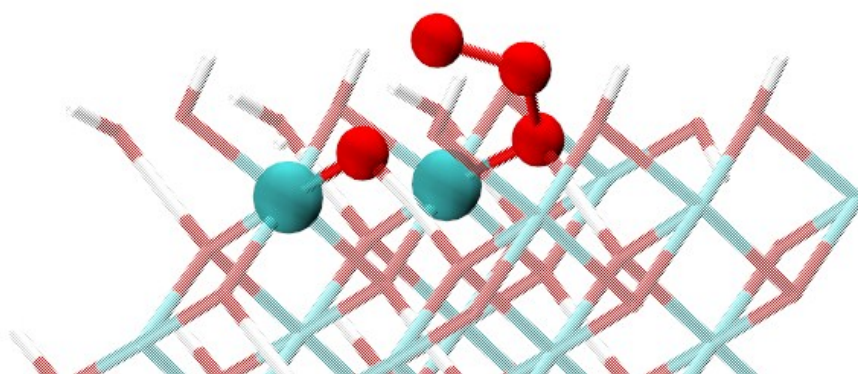

**Figure S5:** Computed transition state for the  $6' \rightarrow 6'^{\dagger}$  step.

### Free energy variation as a function of the potential

In the CHE model, the free energy of a surface does not depend on the applied potential (workfunction). And for an electrochemical step such as in (1), the Gibbs' free energy variation is given by (2). A pH 14 has been used on our modelling to get closer to real experimental conditions.

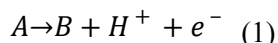

$$\Delta G = G_B + \left( \frac{1}{2} G_{H_2} - 0.059 pH \right) - U - G_A \quad (2)$$

Where the  $G_B$  and  $G_A$  Gibbs' free energies are computed at neutral charge, thus don't include any polarization of the surface induced by the applied electrochemical potential and the Gibbs' free energy of the step ( $\Delta G$ ) is linearly dependent to the potential ( $U$ ).

In order to consider this potential, the total number of electrons in the surface was modified, along with a Poisson-Boltzmann distribution of counter charges for keeping electroneutrality (cf Computational Details). At oxidative potentials (region of interest) a quadratic dependence on the potential was observed (see Figure S6), which is in agreement with previous studies using this model on metal surfaces<sup>2</sup>. When the surface charge is too high, this model loses its validity, therefore we limited the surface charge to 1 electron per cell in the parabolic fit.

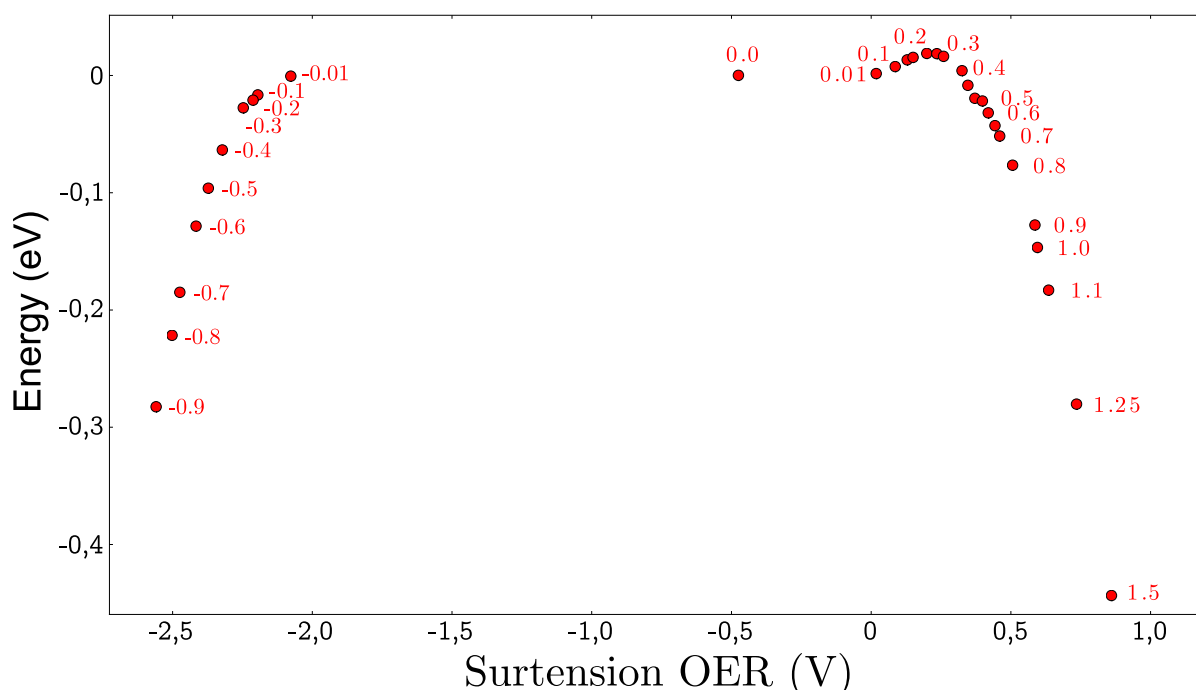

**Figure S6:** Free energy of A surface as a function of the overpotential. The potential versus SHE can be obtained by adding 1.23 V to the overpotential. The numbers given for each point correspond to the total charge of the slab used to obtain this potential.

Because in this approach, the Gibbs' free energy of each intermediate depends on the potential, the Gibbs' energy associated to a step is no longer linear with the potential (equation (3)).



$$\Delta G = G_B(U) + \left( \frac{1}{2}G_{H_2} - 0.059pH \right) - U - G_A(U) \quad (3)$$

Readers interested by interested by this approach are invited to read to following reference where it is presented in more details.<sup>3</sup>

## References

- 1 J. Fester, M. García-Melchor, A. S. Walton, M. Bajdich, Z. Li, L. Lammich, A. Vojvodic and J. V. Lauritsen, *Nat. Com.*, 2017, **8**, 6–13.
- 2 S. N. Steinmann and P. Sautet, *J. Phys. Chem. C*, 2016, **120**, 5619–5623.
- 3 Y. Hajar, L. Treps, C. Michel, E. Baranova and S. Steinmann, *Catal. Sci. Technol.*, 2019, 10.1039/c9cy01421g.

# List of optimized structures for 0 charge systems. POSCAR format.

A

```
1.0000000000000000
 8.5086002349999994 0.0000000000000000 0.0000000000000000
 0.0000000000000000 10.8548107146999993 0.0000000000000000
 0.0000000000000000 0.0000000000000000 30.0000000000000000
Co H O
 24 48 60
Selective dynamics
Direct
0.2484967285840796 0.0494053245343480 0.4007124684372059 T T T
0.2483998973408745 0.5491502475175523 0.4006594428722607 T T T
0.5816970496850757 0.0489442743256490 0.4006269958048136 T T T
0.5817636707728511 0.5489017943454897 0.4006779548794270 T T T
0.9155708529863560 0.0479906165392734 0.4001624375283725 T T T
0.9153295577059879 0.5479309755924859 0.4002160473354834 T T T
0.0833333129999971 0.1817300920000022 0.4673556090000019 F F F
0.0833333129999971 0.6817300319999973 0.4673556090000019 F F F
0.4166666870000029 0.1817300920000022 0.4673556090000019 F F F
0.4166666870000029 0.6817300319999973 0.4673556090000019 F F F
0.7500000000000000 0.1817300920000022 0.4673556090000019 F F F
0.7500000000000000 0.6817300319999973 0.4673556090000019 F F F
0.2500000000000000 0.3182699680000027 0.5326443909999981 F F F
0.2500000000000000 0.8182699079999978 0.5326443909999981 F F F
0.5833333129999971 0.3182699680000027 0.5326443909999981 F F F
0.5833333129999971 0.8182699079999978 0.5326443909999981 F F F
0.9166666870000029 0.3182699680000027 0.5326443909999981 F F F
0.9166666870000029 0.8182699079999978 0.5326443909999981 F F F
0.0846704422940121 0.4520690244075141 0.5997839526645166 T T T
0.0844291470136440 0.9520093834607266 0.5998375624716275 T T T
0.4182363292271489 0.4510982056545103 0.5993220451205730 T T T
0.4183029503149243 0.9510557256743510 0.5993730041951864 T T T
0.7516001026591255 0.4508497524824477 0.5993405571277393 T T T
0.7515032714159204 0.9505946754656520 0.5992875315627941 T T T
0.8166590903616751 0.3700229718846586 0.3621650111350689 T T T
0.4709022549029527 0.3708929151790201 0.3643636133258497 T T T
0.4129596849489872 0.5424150664438869 0.3351878432285744 T T T
0.7453193978227901 0.5396448166762369 0.3352829126963925 T T T
0.7449277861040358 0.0389609515402682 0.3352659405567735 T T T
0.0804097477220935 0.5417234771144237 0.3352209161757997 T T T
0.1342389316409509 0.3721553120182364 0.3658891946773153 T T T
0.1344450779298967 0.8726884082555912 0.3661375590654359 T T T
0.4130117134021987 0.0437079243212040 0.3350899493957513 T T T
0.4663254676288133 0.8720225295110353 0.3653135510892298 T T T
0.0809632656107055 0.0423028396567844 0.3352276500529072 T T T
0.8231277694318280 0.8692374306839596 0.3604390930410446 T T T
0.2516580715671637 0.3024094643321789 0.4013714753212980 T T T
0.2517322544626595 0.8018221513142834 0.4016099761254637 T T T
0.5854427779439746 0.3027298671300471 0.4008556006186765 T T T
0.5848952345439713 0.8043671182442509 0.4002688887006940 T T T
0.9193198244815264 0.2916553182974866 0.4042535383621981 T T T
0.9196539671683084 0.7910366355230778 0.4043408791257193 T T T
0.0833333129999971 0.4317300920000022 0.4673556090000019 F F F
0.0833333129999971 0.9317300920000022 0.4673556090000019 F F F
0.4166666870000029 0.4317300920000022 0.4673556090000019 F F F
0.4166666870000029 0.9317300920000022 0.4673556090000019 F F F
0.7500000000000000 0.4317300920000022 0.4673556090000019 F F F
0.7500000000000000 0.9317300920000022 0.4673556090000019 F F F
0.2500000000000000 0.0682699079999978 0.5326443909999981 F F F
0.2500000000000000 0.5682699079999978 0.5326443909999981 F F F
0.5833333129999971 0.0682699079999978 0.5326443909999981 F F F
0.5833333129999971 0.5682699079999978 0.5326443909999981 F F F
```

|                    |                    |                    |   |   |   |
|--------------------|--------------------|--------------------|---|---|---|
| 0.9166666870000029 | 0.0682699079999978 | 0.5326443909999981 | F | F | F |
| 0.9166666870000029 | 0.5682699079999978 | 0.5326443909999981 | F | F | F |
| 0.0803460328316916 | 0.2089633644769222 | 0.5956591208742807 | T | T | T |
| 0.0806801755184736 | 0.7083446817025134 | 0.5957464616378019 | T | T | T |
| 0.4151047654560287 | 0.1956328817557491 | 0.5997311112993060 | T | T | T |
| 0.4145572220560254 | 0.6972701328699529 | 0.5991443993813235 | T | T | T |
| 0.7482677455373405 | 0.1981778486857166 | 0.5983900238745363 | T | T | T |
| 0.7483419284328363 | 0.6975905356678211 | 0.5986285246787020 | T | T | T |
| 0.1768722305681720 | 0.1307625693160404 | 0.6395609069589554 | T | T | T |
| 0.9190367343892945 | 0.9576971603432156 | 0.6647723499470928 | T | T | T |
| 0.5336745323711867 | 0.1279774704889718 | 0.6346864489107702 | T | T | T |
| 0.5869882865978013 | 0.9562920756787960 | 0.6649100506042487 | T | T | T |
| 0.8655549220701033 | 0.1273115917444088 | 0.6338624409345641 | T | T | T |
| 0.8657610683590491 | 0.6278446879817636 | 0.6341108053226847 | T | T | T |
| 0.9195902522779065 | 0.4582765228855763 | 0.6647790838242003 | T | T | T |
| 0.2550722138959642 | 0.9610390484597318 | 0.6647340594432265 | T | T | T |
| 0.2546806021772099 | 0.4603551833237631 | 0.6647170873036075 | T | T | T |
| 0.5870403150510128 | 0.4575849335561131 | 0.6648121567714256 | T | T | T |
| 0.5290977450970473 | 0.6291070848209799 | 0.6356363866741503 | T | T | T |
| 0.1833409096383249 | 0.6299770281153414 | 0.6378349888649311 | T | T | T |
| 0.4150592425438333 | 0.5962140112829317 | 0.3612895393946829 | T | T | T |
| 0.7485085596773615 | 0.5948011960416082 | 0.3610034866080127 | T | T | T |
| 0.2439434236162654 | 0.3829501359326173 | 0.3763778039511720 | T | T | T |
| 0.5780955660581526 | 0.3825560776150496 | 0.3761199254645078 | T | T | T |
| 0.7485018981959470 | 0.0943281463747994 | 0.3609196015446940 | T | T | T |
| 0.0819985628154924 | 0.5963495758279649 | 0.3611093208623686 | T | T | T |
| 0.4150941322502248 | 0.0969223209644170 | 0.3613475495267124 | T | T | T |
| 0.2444443069564883 | 0.8831543157141653 | 0.3765592266940487 | T | T | T |
| 0.0822820610586774 | 0.0968548248306504 | 0.3611394750103969 | T | T | T |
| 0.5753604512519743 | 0.8828895976156232 | 0.3759111035522693 | T | T | T |
| 0.9188662342591201 | 0.3839946744930103 | 0.3764810252735344 | T | T | T |
| 0.9217279695459197 | 0.8840653790148565 | 0.3764175182281946 | T | T | T |
| 0.2505284872474576 | 0.2086496509435989 | 0.4266866100262803 | T | T | T |
| 0.2505146687601183 | 0.7085450274112759 | 0.4266405671083007 | T | T | T |
| 0.5843068826563353 | 0.2081905172373979 | 0.4266073433869408 | T | T | T |
| 0.5842304994730227 | 0.7081508600968291 | 0.4266208722888152 | T | T | T |
| 0.9168811973180908 | 0.2080948515286636 | 0.4264967228114358 | T | T | T |
| 0.9169357170198111 | 0.7080732476225293 | 0.4265025326557961 | T | T | T |
| 0.0821992368582514 | 0.0197603327405105 | 0.4420544986241168 | T | T | T |
| 0.0821225587104806 | 0.5197188164222055 | 0.4420482803173442 | T | T | T |
| 0.4155814104423214 | 0.0197051311618068 | 0.4420936020948716 | T | T | T |
| 0.4154773635662323 | 0.5196062838861195 | 0.4420796006232450 | T | T | T |
| 0.749197772831504  | 0.0192432723328793 | 0.4419288435375321 | T | T | T |
| 0.7491585282952116 | 0.5193442291542851 | 0.4419887651097625 | T | T | T |
| 0.0833333129999971 | 0.3437488080000008 | 0.4914442899999969 | F | F | F |
| 0.0833333129999971 | 0.8437487779999984 | 0.4914442899999969 | F | F | F |
| 0.4166666870000029 | 0.3437488080000008 | 0.4914442899999969 | F | F | F |
| 0.4166666870000029 | 0.8437487779999984 | 0.4914442899999969 | F | F | F |
| 0.7500000000000000 | 0.3437488080000008 | 0.4914442899999969 | F | F | F |
| 0.7500000000000000 | 0.8437487779999984 | 0.4914442899999969 | F | F | F |
| 0.2500000000000000 | 0.1562512220000016 | 0.5085557100000031 | F | F | F |
| 0.2500000000000000 | 0.6562511919999992 | 0.5085557100000031 | F | F | F |
| 0.5833333129999971 | 0.1562512220000016 | 0.5085557100000031 | F | F | F |
| 0.5833333129999971 | 0.6562511919999992 | 0.5085557100000031 | F | F | F |
| 0.9166666870000029 | 0.1562512220000016 | 0.5085557100000031 | F | F | F |
| 0.9166666870000029 | 0.6562511919999992 | 0.5085557100000031 | F | F | F |
| 0.2508414717047884 | 0.4806557708457149 | 0.5580112348902375 | T | T | T |
| 0.2508022227168496 | 0.9807567276671207 | 0.5580711564624679 | T | T | T |
| 0.5845226364337677 | 0.4803937161138805 | 0.5579203993767550 | T | T | T |
| 0.5844185895576786 | 0.9802948688381932 | 0.5579063979051284 | T | T | T |
| 0.9178774412895194 | 0.4802811835777945 | 0.5579517196826558 | T | T | T |
| 0.9178007631417415 | 0.9802396672594895 | 0.5579455013758832 | T | T | T |
| 0.0830642829801889 | 0.2919267523774707 | 0.5734974673442039 | T | T | T |

|                    |                    |                    |   |   |   |
|--------------------|--------------------|--------------------|---|---|---|
| 0.0831188026819092 | 0.7919051484713364 | 0.5735032771885642 | T | T | T |
| 0.4157695005269773 | 0.2918491399031709 | 0.5733791277111848 | T | T | T |
| 0.4156931173436647 | 0.7918094827626021 | 0.5733926566130592 | T | T | T |
| 0.7494853312398817 | 0.2914549725887241 | 0.5733594328916993 | T | T | T |
| 0.7494715127525424 | 0.7913503490564011 | 0.5733133899737197 | T | T | T |
| 0.0782720304540803 | 0.1159346209851435 | 0.6235824817718054 | T | T | T |
| 0.0811337657408799 | 0.6160053255069897 | 0.6235189747264656 | T | T | T |
| 0.4246395487480257 | 0.1171104023843768 | 0.6240888964477307 | T | T | T |
| 0.9177179389413226 | 0.9031451751693496 | 0.6388605249896031 | T | T | T |
| 0.7555556930435117 | 0.1168456842858347 | 0.6234407733059513 | T | T | T |
| 0.5849058677497680 | 0.9030776790355830 | 0.6386524504732876 | T | T | T |
| 0.9180014371845076 | 0.4036504241720351 | 0.6388906791376314 | T | T | T |
| 0.2514981018040530 | 0.9056718536252006 | 0.6390803984553060 | T | T | T |
| 0.4219044339418474 | 0.6174439223849504 | 0.6238800745354922 | T | T | T |
| 0.7560565763837346 | 0.6170498640673827 | 0.6236221960488280 | T | T | T |
| 0.2514914403226385 | 0.4051988039583918 | 0.6389965133919873 | T | T | T |
| 0.5849407574561667 | 0.4037859887170683 | 0.6387104606053171 | T | T | T |

B

|                    |                     |                     |  |  |  |
|--------------------|---------------------|---------------------|--|--|--|
| 1.0000000000000000 |                     |                     |  |  |  |
| 8.5086002349999994 | 0.0000000000000000  | 0.0000000000000000  |  |  |  |
| 0.0000000000000000 | 10.8548107146999993 | 0.0000000000000000  |  |  |  |
| 0.0000000000000000 | 0.0000000000000000  | 30.0000000000000000 |  |  |  |

Co H O

24 46 60

Selective dynamics

Direct

|                    |                    |                    |   |   |   |
|--------------------|--------------------|--------------------|---|---|---|
| 0.2476448341817208 | 0.0493563385057524 | 0.4010683538773517 | T | T | T |
| 0.2488690155003792 | 0.5500610145576263 | 0.4004784464088306 | T | T | T |
| 0.5809052668755893 | 0.0481388542090271 | 0.4007946653673548 | T | T | T |
| 0.5853003115622379 | 0.5504150151690385 | 0.4003985080061268 | T | T | T |
| 0.9145282385586191 | 0.0490633367817836 | 0.4006991808834647 | T | T | T |
| 0.9171247515432449 | 0.5517180373738777 | 0.3999819946403018 | T | T | T |
| 0.0833333129999971 | 0.1817300920000022 | 0.4673556090000019 | F | F | F |
| 0.0833333129999971 | 0.6817300319999973 | 0.4673556090000019 | F | F | F |
| 0.4166666870000029 | 0.1817300920000022 | 0.4673556090000019 | F | F | F |
| 0.4166666870000029 | 0.6817300319999973 | 0.4673556090000019 | F | F | F |
| 0.7500000000000000 | 0.1817300920000022 | 0.4673556090000019 | F | F | F |
| 0.7500000000000000 | 0.6817300319999973 | 0.4673556090000019 | F | F | F |
| 0.2500000000000000 | 0.3182699680000027 | 0.5326443909999981 | F | F | F |
| 0.2500000000000000 | 0.8182699079999978 | 0.5326443909999981 | F | F | F |
| 0.5833333129999971 | 0.3182699680000027 | 0.5326443909999981 | F | F | F |
| 0.5833333129999971 | 0.8182699079999978 | 0.5326443909999981 | F | F | F |
| 0.9166666870000029 | 0.3182699680000027 | 0.5326443909999981 | F | F | F |
| 0.9166666870000029 | 0.8182699079999978 | 0.5326443909999981 | F | F | F |
| 0.0828752484567552 | 0.4482819626261230 | 0.6000180053596984 | T | T | T |
| 0.0854717614413810 | 0.9509366632182166 | 0.5993008191165350 | T | T | T |
| 0.4146996884377624 | 0.4495849848309610 | 0.5996014919938729 | T | T | T |
| 0.4190947331244100 | 0.9518611457909725 | 0.5992053346326448 | T | T | T |
| 0.7511309844996211 | 0.4499389854423740 | 0.5995215535911690 | T | T | T |
| 0.7523551658182791 | 0.9506436614942479 | 0.5989316461226483 | T | T | T |
| 0.4174499530049940 | 0.5205147679964450 | 0.3391861146303612 | T | T | T |
| 0.7514036998026682 | 0.5552418714763947 | 0.3345647011588251 | T | T | T |
| 0.7279132992769528 | 0.3840282820208268 | 0.3689831820132817 | T | T | T |
| 0.7455172853555413 | 0.0425838532349494 | 0.3353155943185416 | T | T | T |
| 0.0828312254837744 | 0.5522606667358921 | 0.3348053468181986 | T | T | T |
| 0.1101656947750310 | 0.3820612805886517 | 0.3691319063869216 | T | T | T |
| 0.1321952727646382 | 0.8725374311603601 | 0.3652226705755179 | T | T | T |
| 0.4125902267159350 | 0.0467496260973436 | 0.3351133699911128 | T | T | T |
| 0.4741036095692560 | 0.8711565383493871 | 0.3623224423424103 | T | T | T |
| 0.0792876182155100 | 0.0481493728273699 | 0.3354290848545454 | T | T | T |
| 0.8220021502790364 | 0.8692625059730781 | 0.3607110258249424 | T | T | T |
| 0.2483798913441229 | 0.3148140645382815 | 0.3962020097190850 | T | T | T |

|                    |                    |                    |   |   |   |
|--------------------|--------------------|--------------------|---|---|---|
| 0.2514781233459954 | 0.8070022012939930 | 0.3997748548686452 | T | T | T |
| 0.5862121855788972 | 0.3182813838427784 | 0.3947567726627356 | T | T | T |
| 0.5832322260083467 | 0.8043626232826674 | 0.4004507524654965 | T | T | T |
| 0.9153790365547937 | 0.3276709245676831 | 0.3955443057831226 | T | T | T |
| 0.9199080342703472 | 0.7954177411355755 | 0.4043211109925496 | T | T | T |
| 0.0833333129999971 | 0.4317300920000022 | 0.4673556090000019 | F | F | F |
| 0.0833333129999971 | 0.9317300920000022 | 0.4673556090000019 | F | F | F |
| 0.4166666870000029 | 0.4317300920000022 | 0.4673556090000019 | F | F | F |
| 0.4166666870000029 | 0.9317300920000022 | 0.4673556090000019 | F | F | F |
| 0.7500000000000000 | 0.4317300920000022 | 0.4673556090000019 | F | F | F |
| 0.7500000000000000 | 0.9317300920000022 | 0.4673556090000019 | F | F | F |
| 0.2500000000000000 | 0.0682699079999978 | 0.5326443909999981 | F | F | F |
| 0.2500000000000000 | 0.5682699079999978 | 0.5326443909999981 | F | F | F |
| 0.5833333129999971 | 0.0682699079999978 | 0.5326443909999981 | F | F | F |
| 0.5833333129999971 | 0.5682699079999978 | 0.5326443909999981 | F | F | F |
| 0.9166666870000029 | 0.0682699079999978 | 0.5326443909999981 | F | F | F |
| 0.9166666870000029 | 0.5682699079999978 | 0.5326443909999981 | F | F | F |
| 0.0800919657296532 | 0.2045822588644244 | 0.5956788890074501 | T | T | T |
| 0.0846209634452063 | 0.6723290754323168 | 0.6044556942168775 | T | T | T |
| 0.4167677739916538 | 0.1956373767173327 | 0.5995492475344965 | T | T | T |
| 0.4137878144211024 | 0.6817186161572217 | 0.6052432273372647 | T | T | T |
| 0.7485218766540043 | 0.1929977987060069 | 0.6002251451313547 | T | T | T |
| 0.7516201086558767 | 0.6851859354617111 | 0.6037979902809155 | T | T | T |
| 0.1779978497209636 | 0.1307374940269286 | 0.6392889741750576 | T | T | T |
| 0.9207123817844903 | 0.9518506271726301 | 0.6645709151454542 | T | T | T |
| 0.5258963904307447 | 0.1288434616506128 | 0.6376775576575896 | T | T | T |
| 0.5874097732840646 | 0.9532503739026562 | 0.6648866300088868 | T | T | T |
| 0.8678047272353620 | 0.1274625688396462 | 0.6347773294244824 | T | T | T |
| 0.8898343052249688 | 0.6179387194113483 | 0.6308680936130783 | T | T | T |
| 0.9171687745162255 | 0.4477393332641006 | 0.6651946531818014 | T | T | T |
| 0.2544827146444588 | 0.9574161467650437 | 0.6646844056814587 | T | T | T |
| 0.2720867007230471 | 0.6159717179791727 | 0.6310168179867177 | T | T | T |
| 0.2485963001973388 | 0.4447581285236054 | 0.6654352988411740 | T | T | T |
| 0.5825500469950059 | 0.4794852320035550 | 0.6608138853696395 | T | T | T |
| 0.4172102896301265 | 0.5889915867919845 | 0.3604604048856895 | T | T | T |
| 0.7505965344906150 | 0.6045737749735568 | 0.3618231718437936 | T | T | T |
| 0.2283064781935130 | 0.3875327740667579 | 0.3741823551823376 | T | T | T |
| 0.6078146579593918 | 0.3890957053728120 | 0.3732865869966431 | T | T | T |
| 0.7474077007286960 | 0.0951946288520794 | 0.3617591393768195 | T | T | T |
| 0.0837481268703498 | 0.6032210040264570 | 0.3616720610977032 | T | T | T |
| 0.4147106484701468 | 0.0966568264094883 | 0.3622300379271821 | T | T | T |
| 0.2421509821516348 | 0.8833969420207275 | 0.3757314270694441 | T | T | T |
| 0.0810016449439938 | 0.0988996673450184 | 0.3623597558242275 | T | T | T |
| 0.5781282519617795 | 0.8829628243090948 | 0.3760207497171572 | T | T | T |
| 0.9154674024937668 | 0.3946111902574506 | 0.3725842706168154 | T | T | T |
| 0.9202914444967831 | 0.8848255120465708 | 0.3768452109353810 | T | T | T |
| 0.2506297666548181 | 0.2075902250041572 | 0.4270189625362905 | T | T | T |
| 0.2518043467019264 | 0.7086477973447700 | 0.4269209982740907 | T | T | T |
| 0.5856455849971189 | 0.2061192613410809 | 0.4273288748021611 | T | T | T |
| 0.5823591710180788 | 0.7087708695436192 | 0.4269026768786757 | T | T | T |
| 0.9121223067215242 | 0.2061488176075703 | 0.4279582340524700 | T | T | T |
| 0.9176233710382489 | 0.7109394127751488 | 0.4272191484105872 | T | T | T |
| 0.0813523249291203 | 0.0190522478230630 | 0.4425083078184623 | T | T | T |
| 0.0825546386819741 | 0.5206949479713755 | 0.4421364659488749 | T | T | T |
| 0.4152907225472325 | 0.0185783696795657 | 0.4424908125082694 | T | T | T |
| 0.4171720173915544 | 0.5187437622958184 | 0.4418592870084179 | T | T | T |
| 0.7480596322647222 | 0.0200197857870770 | 0.4424177376983672 | T | T | T |
| 0.7512992086087261 | 0.5200897761589255 | 0.4422720736065376 | T | T | T |
| 0.0833333129999971 | 0.3437488080000008 | 0.4914442899999969 | F | F | F |
| 0.0833333129999971 | 0.8437487779999984 | 0.4914442899999969 | F | F | F |
| 0.4166666870000029 | 0.3437488080000008 | 0.4914442899999969 | F | F | F |
| 0.4166666870000029 | 0.8437487779999984 | 0.4914442899999969 | F | F | F |
| 0.7500000000000000 | 0.3437488080000008 | 0.4914442899999969 | F | F | F |

|                    |                    |                    |   |   |   |
|--------------------|--------------------|--------------------|---|---|---|
| 0.7500000000000000 | 0.8437487779999984 | 0.4914442899999969 | F | F | F |
| 0.2500000000000000 | 0.1562512220000016 | 0.5085557100000031 | F | F | F |
| 0.2500000000000000 | 0.6562511919999992 | 0.5085557100000031 | F | F | F |
| 0.5833333129999971 | 0.1562512220000016 | 0.5085557100000031 | F | F | F |
| 0.5833333129999971 | 0.6562511919999992 | 0.5085557100000031 | F | F | F |
| 0.9166666870000029 | 0.1562512220000016 | 0.5085557100000031 | F | F | F |
| 0.9166666870000029 | 0.6562511919999992 | 0.5085557100000031 | F | F | F |
| 0.2487007913912735 | 0.4799102238410747 | 0.5577279263934622 | T | T | T |
| 0.2519403677352781 | 0.9799802142129228 | 0.5575822623016328 | T | T | T |
| 0.5828279826084459 | 0.4812562377041822 | 0.5581407129915816 | T | T | T |
| 0.5847092774527674 | 0.9814216303204337 | 0.5575091874917313 | T | T | T |
| 0.9174453613180260 | 0.4793050520286249 | 0.5578635340511255 | T | T | T |
| 0.9186476750708794 | 0.9809477521769367 | 0.5574916921815373 | T | T | T |
| 0.0823766289617583 | 0.2890605872248515 | 0.5727808515894131 | T | T | T |
| 0.0878776932784758 | 0.7938511823924294 | 0.5720417659475304 | T | T | T |
| 0.4176408289819215 | 0.2912291304563804 | 0.5730973231213246 | T | T | T |
| 0.4143544150028812 | 0.7938807386589193 | 0.5726711251978386 | T | T | T |
| 0.7481956532980739 | 0.2913522026552298 | 0.5730790017259095 | T | T | T |
| 0.7493702333451819 | 0.7924097749958428 | 0.5729810374637092 | T | T | T |
| 0.0797085555032172 | 0.1151744879534294 | 0.6231547890646195 | T | T | T |
| 0.0845325975062260 | 0.6053888097425487 | 0.6274157293831847 | T | T | T |
| 0.4218717480382205 | 0.1170371756909053 | 0.6239792502828424 | T | T | T |
| 0.9189983550560060 | 0.9011003326549821 | 0.6376402441757725 | T | T | T |
| 0.7578490178483648 | 0.1166030579792723 | 0.6242685729305556 | T | T | T |
| 0.5852893515298533 | 0.9033431735905120 | 0.6377699620728174 | T | T | T |
| 0.9162518731296504 | 0.3967789959735435 | 0.6383279389022969 | T | T | T |
| 0.2525922992713034 | 0.9048053711479203 | 0.6382408606231809 | T | T | T |
| 0.3921853420406154 | 0.6109042946271879 | 0.6267134130033561 | T | T | T |
| 0.7716935218064875 | 0.6124672259332420 | 0.6258176448176626 | T | T | T |
| 0.2494034655093849 | 0.3954262250264430 | 0.6381768281562061 | T | T | T |
| 0.5827897103698660 | 0.4110084132080158 | 0.6395395951143106 | T | T | T |

B'

|                    |                     |                     |
|--------------------|---------------------|---------------------|
| 1.0000000000000000 |                     |                     |
| 8.5086002349999994 | 0.0000000000000000  | 0.0000000000000000  |
| 0.0000000000000000 | 10.8548107146999993 | 0.0000000000000000  |
| 0.0000000000000000 | 0.0000000000000000  | 30.0000000000000000 |

Co H O

24 46 60

Selective dynamics

Direct

|                    |                    |                    |   |   |   |
|--------------------|--------------------|--------------------|---|---|---|
| 0.5784638993669684 | 0.5502031754799619 | 0.4004149331026978 | T | T | T |
| 0.2540571410976101 | 0.5507357753876069 | 0.4000370428929313 | T | T | T |
| 0.5816996352802669 | 0.0496363778774448 | 0.4005857244495352 | T | T | T |
| 0.2481900944677377 | 0.0501361364239639 | 0.4005179462754868 | T | T | T |
| 0.9155232044720609 | 0.0488747123879778 | 0.4000892947670557 | T | T | T |
| 0.9154359826103422 | 0.5489638521189464 | 0.3999052803640648 | T | T | T |
| 0.0833333129999971 | 0.1817300920000022 | 0.4673556090000019 | F | F | F |
| 0.0833333129999971 | 0.6817300319999973 | 0.4673556090000019 | F | F | F |
| 0.4166666870000029 | 0.1817300920000022 | 0.4673556090000019 | F | F | F |
| 0.4166666870000029 | 0.6817300319999973 | 0.4673556090000019 | F | F | F |
| 0.7500000000000000 | 0.1817300920000022 | 0.4673556090000019 | F | F | F |
| 0.7500000000000000 | 0.6817300319999973 | 0.4673556090000019 | F | F | F |
| 0.2500000000000000 | 0.3182699680000027 | 0.5326443909999981 | F | F | F |
| 0.2500000000000000 | 0.8182699079999978 | 0.5326443909999981 | F | F | F |
| 0.5833333129999971 | 0.3182699680000027 | 0.5326443909999981 | F | F | F |
| 0.5833333129999971 | 0.8182699079999978 | 0.5326443909999981 | F | F | F |
| 0.9166666870000029 | 0.3182699680000027 | 0.5326443909999981 | F | F | F |
| 0.9166666870000029 | 0.8182699079999978 | 0.5326443909999981 | F | F | F |
| 0.0845640173896577 | 0.4510361478810535 | 0.6000947196359350 | T | T | T |
| 0.0844767955279391 | 0.9511252876120223 | 0.5999107052329442 | T | T | T |
| 0.7518099055322623 | 0.9498638635760360 | 0.5994820537245128 | T | T | T |
| 0.4183003647197326 | 0.9503636221225557 | 0.5994142755504651 | T | T | T |

|                    |                    |                    |   |   |   |
|--------------------|--------------------|--------------------|---|---|---|
| 0.7459428589023900 | 0.4492642246123925 | 0.5999629571070683 | T | T | T |
| 0.4215361006330315 | 0.4497968245200387 | 0.5995850668973021 | T | T | T |
| 0.7424838324271906 | 0.5435119743865080 | 0.3347976262155323 | T | T | T |
| 0.4712958875042751 | 0.3752502569556990 | 0.3622459729529346 | T | T | T |
| 0.8222516081225349 | 0.3707522157497777 | 0.3601370410586857 | T | T | T |
| 0.7450750905586462 | 0.0419975611973640 | 0.3350107650405622 | T | T | T |
| 0.0869739527510735 | 0.5470206099850319 | 0.3345414034678280 | T | T | T |
| 0.1271848272919762 | 0.3753822491526713 | 0.3683112734814523 | T | T | T |
| 0.1271078227345822 | 0.8748792883434741 | 0.3663520875970218 | T | T | T |
| 0.4133907744980529 | 0.0477212011078514 | 0.3345525487888107 | T | T | T |
| 0.4714137315462176 | 0.8724604754408735 | 0.3628574174862010 | T | T | T |
| 0.0812681400913862 | 0.0481957303520593 | 0.3345927853308366 | T | T | T |
| 0.8318216396843917 | 0.8694327289588660 | 0.3581955836625796 | T | T | T |
| 0.2496115606436103 | 0.3022725247559462 | 0.4023844286591343 | T | T | T |
| 0.2508644526997948 | 0.8096634992526606 | 0.3987780626745643 | T | T | T |
| 0.5824562538045807 | 0.3065147932372304 | 0.3994199364373422 | T | T | T |
| 0.5845528185913006 | 0.8065851701807404 | 0.3995828924734136 | T | T | T |
| 0.9178574307597868 | 0.2921061745085172 | 0.4043625317638118 | T | T | T |
| 0.9192467050388515 | 0.7914260505706227 | 0.4044569025756260 | T | T | T |
| 0.0833333129999971 | 0.4317300920000022 | 0.4673556090000019 | F | F | F |
| 0.0833333129999971 | 0.9317300920000022 | 0.4673556090000019 | F | F | F |
| 0.4166666870000029 | 0.4317300920000022 | 0.4673556090000019 | F | F | F |
| 0.4166666870000029 | 0.9317300920000022 | 0.4673556090000019 | F | F | F |
| 0.7500000000000000 | 0.4317300920000022 | 0.4673556090000019 | F | F | F |
| 0.7500000000000000 | 0.9317300920000022 | 0.4673556090000019 | F | F | F |
| 0.2500000000000000 | 0.0682699079999978 | 0.5326443909999981 | F | F | F |
| 0.2500000000000000 | 0.5682699079999978 | 0.5326443909999981 | F | F | F |
| 0.5833333129999971 | 0.0682699079999978 | 0.5326443909999981 | F | F | F |
| 0.5833333129999971 | 0.5682699079999978 | 0.5326443909999981 | F | F | F |
| 0.9166666870000029 | 0.0682699079999978 | 0.5326443909999981 | F | F | F |
| 0.9166666870000029 | 0.5682699079999978 | 0.5326443909999981 | F | F | F |
| 0.0807532949611487 | 0.2085739494293775 | 0.5955430974243741 | T | T | T |
| 0.0821425692402126 | 0.7078938254914823 | 0.5956374682361882 | T | T | T |
| 0.4154471814086995 | 0.1934148298192594 | 0.6004171075265864 | T | T | T |
| 0.4175437461954191 | 0.6934852067627696 | 0.6005800635626577 | T | T | T |
| 0.7491355473002049 | 0.1903365007473395 | 0.6012219373254355 | T | T | T |
| 0.7503884393563898 | 0.6977274752440539 | 0.5976155713408654 | T | T | T |
| 0.1681783603156084 | 0.1305672710411338 | 0.6418044163374199 | T | T | T |
| 0.9187318599086138 | 0.9518042696479411 | 0.6654072146691635 | T | T | T |
| 0.5285862684537822 | 0.1275395245591267 | 0.6371425825137990 | T | T | T |
| 0.5866092255019474 | 0.9522787988921484 | 0.6654474512111898 | T | T | T |
| 0.8728921772654182 | 0.1251207116565257 | 0.6336479124029780 | T | T | T |
| 0.8728151727080239 | 0.6246177508473285 | 0.6316887265185470 | T | T | T |
| 0.9130260472489261 | 0.4529793900149680 | 0.6654585965321721 | T | T | T |
| 0.2549249094413538 | 0.9580024388026361 | 0.6649892349594381 | T | T | T |
| 0.1777483918774650 | 0.6292477842502221 | 0.6398629589413142 | T | T | T |
| 0.5287041124957245 | 0.6247497430443010 | 0.6377540270470653 | T | T | T |
| 0.2575161675728095 | 0.4564880256134917 | 0.6652023737844678 | T | T | T |
| 0.4110753280962736 | 0.5873452481078040 | 0.3643629595324525 | T | T | T |
| 0.7465592284182502 | 0.5966074557257193 | 0.3610751944246149 | T | T | T |
| 0.2389650556050308 | 0.3837901618803323 | 0.3777560457439749 | T | T | T |
| 0.5764654614143113 | 0.3836625129516620 | 0.3755593988382716 | T | T | T |
| 0.7485840266705491 | 0.0957559146572546 | 0.3611191829516674 | T | T | T |
| 0.0853251714150029 | 0.5986530995979572 | 0.3612436048442080 | T | T | T |
| 0.4149757485834150 | 0.0981519729992399 | 0.3615274813904565 | T | T | T |
| 0.2400128332468865 | 0.8841539881933831 | 0.3752927902169675 | T | T | T |
| 0.0821454771846500 | 0.0993796986112170 | 0.3613941596018320 | T | T | T |
| 0.5771426590614404 | 0.8834590086541205 | 0.3754978143214914 | T | T | T |
| 0.9199485202580767 | 0.3848475336758846 | 0.3766635001447565 | T | T | T |
| 0.9247188295009005 | 0.8847893789752407 | 0.3765888833157932 | T | T | T |
| 0.2505129361966486 | 0.2083034637395237 | 0.4268349032303086 | T | T | T |
| 0.2509035758666209 | 0.7074416867052684 | 0.4267889113832246 | T | T | T |
| 0.5839206679316885 | 0.2082140329313729 | 0.4267166525812123 | T | T | T |



|                    |                    |                    |   |   |   |
|--------------------|--------------------|--------------------|---|---|---|
| 0.5837315862992972 | 0.7084476878555210 | 0.4267572695540617 | T | T | T |
| 0.9165451191305828 | 0.2086102419864675 | 0.4265747684157375 | T | T | T |
| 0.9167964739424088 | 0.7085871599672261 | 0.4265356986970371 | T | T | T |
| 0.0821922559844335 | 0.0199539759944712 | 0.4419840486436719 | T | T | T |
| 0.0825776296833175 | 0.5198832437861477 | 0.4415481339627300 | T | T | T |
| 0.4152266159076594 | 0.0195629913994919 | 0.4419721102945475 | T | T | T |
| 0.4157769980988932 | 0.5197656828716474 | 0.4424704629296975 | T | T | T |
| 0.7492452511449441 | 0.0193501224004046 | 0.4418826587594437 | T | T | T |
| 0.7499527593143757 | 0.5194718501701990 | 0.4416821207181470 | T | T | T |
| 0.0833333129999971 | 0.3437488080000008 | 0.4914442899999969 | F | F | F |
| 0.0833333129999971 | 0.8437487779999984 | 0.4914442899999969 | F | F | F |
| 0.4166666870000029 | 0.3437488080000008 | 0.4914442899999969 | F | F | F |
| 0.4166666870000029 | 0.8437487779999984 | 0.4914442899999969 | F | F | F |
| 0.7500000000000000 | 0.3437488080000008 | 0.4914442899999969 | F | F | F |
| 0.7500000000000000 | 0.8437487779999984 | 0.4914442899999969 | F | F | F |
| 0.2500000000000000 | 0.1562512220000016 | 0.5085557100000031 | F | F | F |
| 0.2500000000000000 | 0.6562511919999992 | 0.5085557100000031 | F | F | F |
| 0.5833333129999971 | 0.1562512220000016 | 0.5085557100000031 | F | F | F |
| 0.5833333129999971 | 0.6562511919999992 | 0.5085557100000031 | F | F | F |
| 0.9166666870000029 | 0.1562512220000016 | 0.5085557100000031 | F | F | F |
| 0.9166666870000029 | 0.6562511919999992 | 0.5085557100000031 | F | F | F |
| 0.2500472406856242 | 0.4805281498298010 | 0.5583178792818531 | T | T | T |
| 0.2507547488550556 | 0.9806498775995954 | 0.5581173412405563 | T | T | T |
| 0.5842230019011067 | 0.4802343171283529 | 0.5575295370703029 | T | T | T |
| 0.5847733840923409 | 0.9804370086005079 | 0.5580278897054528 | T | T | T |
| 0.9174223703166825 | 0.4801167562138521 | 0.5584518660372697 | T | T | T |
| 0.9178077440155666 | 0.9800460240055285 | 0.5580159513563280 | T | T | T |
| 0.0832035260575909 | 0.2914128400327737 | 0.5734643013029633 | T | T | T |
| 0.0834548808694174 | 0.7913897580135321 | 0.5734252315842623 | T | T | T |
| 0.4162684137007027 | 0.2915523121444793 | 0.5732427304459383 | T | T | T |
| 0.4160793320683113 | 0.7917859670686271 | 0.5732833474187876 | T | T | T |
| 0.7490964241333792 | 0.2925583132947319 | 0.5732110886167751 | T | T | T |
| 0.7494870638033515 | 0.7916965362604760 | 0.5731650967696916 | T | T | T |
| 0.0752811704990992 | 0.1152106210247591 | 0.6234111166842068 | T | T | T |
| 0.0800514797419235 | 0.6151524663241150 | 0.6233364998552434 | T | T | T |
| 0.4228573409385666 | 0.1165409913458792 | 0.6245021856785083 | T | T | T |
| 0.9178545228153503 | 0.9006203013887830 | 0.6386058403981679 | T | T | T |
| 0.7599871667531131 | 0.1158460118066165 | 0.6247072097830322 | T | T | T |
| 0.5850242514165850 | 0.9018480270007603 | 0.6384725186095437 | T | T | T |
| 0.9146748285849968 | 0.4013469004020354 | 0.6387563951557919 | T | T | T |
| 0.2514159733294512 | 0.9042440853427456 | 0.6388808170483325 | T | T | T |
| 0.4235345385856888 | 0.6163374870483378 | 0.6244406011617286 | T | T | T |
| 0.7610349443949693 | 0.6162098381196672 | 0.6222439542560251 | T | T | T |
| 0.2534407715817506 | 0.4033925442742811 | 0.6389248055753841 | T | T | T |
| 0.5889246719037263 | 0.4126547518921960 | 0.6356370404675474 | T | T | T |

C

|                    |                     |                     |  |  |  |
|--------------------|---------------------|---------------------|--|--|--|
| 1.00000000000000   |                     |                     |  |  |  |
| 8.5086002349999994 | 0.0000000000000000  | 0.0000000000000000  |  |  |  |
| 0.0000000000000000 | 10.8548107146999993 | 0.0000000000000000  |  |  |  |
| 0.0000000000000000 | 0.0000000000000000  | 30.0000000000000000 |  |  |  |

Co H O

24 48 62

Selective dynamics

Direct

|                    |                    |                    |   |   |   |
|--------------------|--------------------|--------------------|---|---|---|
| 0.5845629660925776 | 0.5503777386794213 | 0.4005626180625899 | T | T | T |
| 0.2496387031927626 | 0.5465347394822587 | 0.3995131486781998 | T | T | T |
| 0.5817103778219893 | 0.0497188655997226 | 0.4007869699150583 | T | T | T |
| 0.2495917465107285 | 0.0474738151126125 | 0.4003748900696216 | T | T | T |
| 0.9151513934401635 | 0.0496392389837352 | 0.4002574400353759 | T | T | T |
| 0.9162182017799461 | 0.5505201543810473 | 0.4007469309885640 | T | T | T |
| 0.0833333129999971 | 0.1817300920000022 | 0.4673556090000019 | F | F | F |
| 0.0833333129999971 | 0.6817300319999973 | 0.4673556090000019 | F | F | F |

|                    |                    |                    |   |   |   |
|--------------------|--------------------|--------------------|---|---|---|
| 0.4166666870000029 | 0.1817300920000022 | 0.4673556090000019 | F | F | F |
| 0.4166666870000029 | 0.6817300319999973 | 0.4673556090000019 | F | F | F |
| 0.7500000000000000 | 0.1817300920000022 | 0.4673556090000019 | F | F | F |
| 0.7500000000000000 | 0.6817300319999973 | 0.4673556090000019 | F | F | F |
| 0.2500000000000000 | 0.3182699680000027 | 0.5326443909999981 | F | F | F |
| 0.2500000000000000 | 0.8182699079999978 | 0.5326443909999981 | F | F | F |
| 0.5833333129999971 | 0.3182699680000027 | 0.5326443909999981 | F | F | F |
| 0.5833333129999971 | 0.8182699079999978 | 0.5326443909999981 | F | F | F |
| 0.9166666870000029 | 0.3182699680000027 | 0.5326443909999981 | F | F | F |
| 0.9166666870000029 | 0.8182699079999978 | 0.5326443909999981 | F | F | F |
| 0.0837817982200539 | 0.4494798456189527 | 0.5992530690114360 | T | T | T |
| 0.0848486065598366 | 0.9503607610162649 | 0.5997425599646241 | T | T | T |
| 0.7504082534892714 | 0.9525261848873875 | 0.5996251099303783 | T | T | T |
| 0.4182896221780107 | 0.9502811344002774 | 0.5992130300849418 | T | T | T |
| 0.7503612968072374 | 0.4534652605177412 | 0.6004868513218001 | T | T | T |
| 0.4154370339074223 | 0.4496222613205787 | 0.5994373819374101 | T | T | T |
| 0.7165701876568977 | 0.3782845508696632 | 0.3698179601658805 | T | T | T |
| 0.1528193132001034 | 0.2501009555883690 | 0.3471815883147695 | T | T | T |
| 0.4215694864990907 | 0.5186754272738969 | 0.3396789436372848 | T | T | T |
| 0.7513696722844965 | 0.5499512278338031 | 0.3350896968663039 | T | T | T |
| 0.7454856929697270 | 0.0428512122625791 | 0.3351844354691441 | T | T | T |
| 0.0837352132278682 | 0.5396914444447175 | 0.3346124346245194 | T | T | T |
| 0.9938931959766600 | 0.3719492909634506 | 0.3584213270716316 | T | T | T |
| 0.1443329731453824 | 0.8719340295378112 | 0.3637381188531824 | T | T | T |
| 0.4138077446247851 | 0.0428031249047409 | 0.3351464203044500 | T | T | T |
| 0.4666660574065876 | 0.8727436693513120 | 0.3652472334524229 | T | T | T |
| 0.0827637451403447 | 0.0516139133979286 | 0.3334052137267431 | T | T | T |
| 0.8165135636649302 | 0.8705020658110718 | 0.3619055926670156 | T | T | T |
| 0.2575054041262303 | 0.2894324434972965 | 0.4058407889467621 | T | T | T |
| 0.2524864511250837 | 0.7916084100898551 | 0.4039642606858521 | T | T | T |
| 0.5772070525750302 | 0.3148743738629147 | 0.3962420275960953 | T | T | T |
| 0.5851763561847614 | 0.8064113149349098 | 0.3999042595319880 | T | T | T |
| 0.9109703608992542 | 0.2985215930720628 | 0.4042338922297330 | T | T | T |
| 0.9202585089150650 | 0.7981113503074195 | 0.4030242617311597 | T | T | T |
| 0.0833333129999971 | 0.4317300920000022 | 0.4673556090000019 | F | F | F |
| 0.0833333129999971 | 0.9317300920000022 | 0.4673556090000019 | F | F | F |
| 0.4166666870000029 | 0.4317300920000022 | 0.4673556090000019 | F | F | F |
| 0.4166666870000029 | 0.9317300920000022 | 0.4673556090000019 | F | F | F |
| 0.7500000000000000 | 0.4317300920000022 | 0.4673556090000019 | F | F | F |
| 0.7500000000000000 | 0.9317300920000022 | 0.4673556090000019 | F | F | F |
| 0.2500000000000000 | 0.0682699079999978 | 0.5326443909999981 | F | F | F |
| 0.2500000000000000 | 0.5682699079999978 | 0.5326443909999981 | F | F | F |
| 0.5833333129999971 | 0.0682699079999978 | 0.5326443909999981 | F | F | F |
| 0.5833333129999971 | 0.5682699079999978 | 0.5326443909999981 | F | F | F |
| 0.9166666870000029 | 0.0682699079999978 | 0.5326443909999981 | F | F | F |
| 0.9166666870000029 | 0.5682699079999978 | 0.5326443909999981 | F | F | F |
| 0.0797414910849350 | 0.2018886496925804 | 0.5969757382688402 | T | T | T |
| 0.0890296391007458 | 0.7014784069279372 | 0.5957661077702670 | T | T | T |
| 0.4148236438152386 | 0.1935886850650902 | 0.6000957404680120 | T | T | T |
| 0.4227929474249698 | 0.6851256261370853 | 0.6037579724039047 | T | T | T |
| 0.7475135488749163 | 0.2083915899101449 | 0.5960357393141480 | T | T | T |
| 0.7424945958737696 | 0.7105675565027034 | 0.5941592110532379 | T | T | T |
| 0.1834864363350697 | 0.1294979341889282 | 0.6380944073329844 | T | T | T |
| 0.9172362548596552 | 0.9483860866020714 | 0.6665947862732570 | T | T | T |
| 0.5333339425934124 | 0.1272563306486880 | 0.6347527665475771 | T | T | T |
| 0.5861922553752149 | 0.9571968750952591 | 0.6648535796955500 | T | T | T |
| 0.8556670268546176 | 0.1280659704621888 | 0.6362618811468176 | T | T | T |
| 0.0061068040233399 | 0.6280507090365494 | 0.6415786729283683 | T | T | T |
| 0.9162647867721317 | 0.4603085555552824 | 0.6653875653754806 | T | T | T |
| 0.2545143070302730 | 0.9571487877374208 | 0.6648155645308560 | T | T | T |
| 0.2486303277155036 | 0.4500487721661969 | 0.6649103031336890 | T | T | T |
| 0.5784305135009092 | 0.4813245727261031 | 0.6603210563627152 | T | T | T |
| 0.8471806867998967 | 0.7498990444116310 | 0.6528184116852376 | T | T | T |

|                    |                    |                    |   |   |   |
|--------------------|--------------------|--------------------|---|---|---|
| 0.2834298123431023 | 0.6217154491303368 | 0.6301820398341195 | T | T | T |
| 0.1725727993807005 | 0.3398648251929597 | 0.3394950382383829 | T | T | T |
| 0.4176607734237723 | 0.5894845355574374 | 0.3599315842355111 | T | T | T |
| 0.7508814292065860 | 0.6016630496879287 | 0.3617601751641641 | T | T | T |
| 0.2704938590565768 | 0.3817922837960953 | 0.3774395789161200 | T | T | T |
| 0.5996365009538595 | 0.3874687359410300 | 0.3742071195926668 | T | T | T |
| 0.7484638365283486 | 0.0966528308020180 | 0.3612931667751246 | T | T | T |
| 0.0832321111366733 | 0.5935609849146215 | 0.3607055755676778 | T | T | T |
| 0.4149138973315172 | 0.0963070436039078 | 0.3613524615781991 | T | T | T |
| 0.2499164080528229 | 0.8840514254988664 | 0.3765471807677142 | T | T | T |
| 0.0849830674114548 | 0.1008968353591924 | 0.3606765775691341 | T | T | T |
| 0.5764460190325263 | 0.8832006230406309 | 0.3756186190330733 | T | T | T |
| 0.9027631629268815 | 0.3858966369351719 | 0.3787153427746022 | T | T | T |
| 0.9182541686369650 | 0.8846346656271610 | 0.3764907933253895 | T | T | T |
| 0.2500301800833712 | 0.2072577289930205 | 0.4267827862539825 | T | T | T |
| 0.2507493926707009 | 0.7070852552725103 | 0.4261987583914275 | T | T | T |
| 0.5820738090742690 | 0.2078665772860139 | 0.4268068932396867 | T | T | T |
| 0.5830207825223938 | 0.7088197305424773 | 0.4268584768633965 | T | T | T |
| 0.9164975138386607 | 0.2087558869736182 | 0.4267029879918754 | T | T | T |
| 0.9180944319509371 | 0.7102335989486098 | 0.4266569405455468 | T | T | T |
| 0.0823205209051304 | 0.0196926014339469 | 0.4418429826699709 | T | T | T |
| 0.0834791189083776 | 0.5194742303817771 | 0.4419138295836091 | T | T | T |
| 0.4151917521861502 | 0.0192556245806989 | 0.4420884148275001 | T | T | T |
| 0.4165652747238817 | 0.5186660832901749 | 0.4416688481062464 | T | T | T |
| 0.7498970664980429 | 0.0195454243532873 | 0.4418154236340778 | T | T | T |
| 0.7505416854116460 | 0.5209274559824096 | 0.4422995863829605 | T | T | T |
| 0.0833333129999971 | 0.3437488080000008 | 0.4914442899999969 | F | F | F |
| 0.0833333129999971 | 0.8437487779999984 | 0.4914442899999969 | F | F | F |
| 0.4166666870000029 | 0.3437488080000008 | 0.4914442899999969 | F | F | F |
| 0.4166666870000029 | 0.8437487779999984 | 0.4914442899999969 | F | F | F |
| 0.7500000000000000 | 0.3437488080000008 | 0.4914442899999969 | F | F | F |
| 0.7500000000000000 | 0.8437487779999984 | 0.4914442899999969 | F | F | F |
| 0.2500000000000000 | 0.1562512220000016 | 0.5085557100000031 | F | F | F |
| 0.2500000000000000 | 0.6562511919999992 | 0.5085557100000031 | F | F | F |
| 0.5833333129999971 | 0.1562512220000016 | 0.5085557100000031 | F | F | F |
| 0.5833333129999971 | 0.6562511919999992 | 0.5085557100000031 | F | F | F |
| 0.9166666870000029 | 0.1562512220000016 | 0.5085557100000031 | F | F | F |
| 0.9166666870000029 | 0.6562511919999992 | 0.5085557100000031 | F | F | F |
| 0.2494583145883540 | 0.4790725440175904 | 0.5577004136170395 | T | T | T |
| 0.2501029335019571 | 0.9804545756467128 | 0.5581845763659222 | T | T | T |
| 0.5834347252761183 | 0.4813339167098250 | 0.5583311518937536 | T | T | T |
| 0.5848082478138498 | 0.9807443754193012 | 0.5579115851724999 | T | T | T |
| 0.9165208810916224 | 0.4805257696182230 | 0.5580861704163909 | T | T | T |
| 0.9176794790948696 | 0.9803073985660531 | 0.5581570173300291 | T | T | T |
| 0.0819055680490629 | 0.2897664010513902 | 0.5733430594544532 | T | T | T |
| 0.0835024861613392 | 0.7912441130263819 | 0.5732970120081246 | T | T | T |
| 0.4169792174776063 | 0.2911802694575227 | 0.5731415231366035 | T | T | T |
| 0.4179261909257310 | 0.7921334227139860 | 0.5731931067603133 | T | T | T |
| 0.7492506073292990 | 0.2929147447274897 | 0.5738012416085726 | T | T | T |
| 0.7499698199166287 | 0.7927422710069795 | 0.5732172137460175 | T | T | T |
| 0.0817458313630350 | 0.1153653343728391 | 0.6235092066746104 | T | T | T |
| 0.0972368370731185 | 0.6141033630648280 | 0.6212846572253978 | T | T | T |
| 0.4235539809674737 | 0.1167993769593692 | 0.6243813809669267 | T | T | T |
| 0.9150169325885452 | 0.8991031646408076 | 0.6393234224308658 | T | T | T |
| 0.7500835919471771 | 0.1159485745011336 | 0.6234528192322858 | T | T | T |
| 0.5850861026684828 | 0.9036929563960922 | 0.6386475384218009 | T | T | T |
| 0.916767888633267  | 0.4064390150853784 | 0.6392944244323221 | T | T | T |
| 0.2515361634716514 | 0.9033471691979820 | 0.6387068332248754 | T | T | T |
| 0.4003634990461405 | 0.6125312640589700 | 0.6257928804073332 | T | T | T |
| 0.7295061409434233 | 0.6182077162039047 | 0.6225604210838800 | T | T | T |
| 0.2491185707934140 | 0.3983369503120713 | 0.6382398248358359 | T | T | T |
| 0.5823392265762277 | 0.4105154644425626 | 0.6400684157644888 | T | T | T |
| 0.8274272006192995 | 0.6601351748070403 | 0.6605049617616171 | T | T | T |

C'

1.0000000000000000  
8.5086002349999994 0.0000000000000000 0.0000000000000000  
0.0000000000000000 10.8548107146999993 0.0000000000000000  
0.0000000000000000 0.0000000000000000 30.0000000000000000

Co H O  
24 48 62

Selective dynamics

Direct

|                    |                    |                    |   |   |   |
|--------------------|--------------------|--------------------|---|---|---|
| 0.2519193581486618 | 0.0491782716604945 | 0.4006166877461581 | T | T | T |
| 0.2464724148188964 | 0.5485779963961335 | 0.4003773206372685 | T | T | T |
| 0.5860995317206914 | 0.0508463063913140 | 0.4007738646129440 | T | T | T |
| 0.5818602077139943 | 0.5485378414952038 | 0.4007307385311805 | T | T | T |
| 0.918733222774458  | 0.0498907979377847 | 0.4003966951823443 | T | T | T |
| 0.9148361743452753 | 0.5486119420120872 | 0.4005602073695869 | T | T | T |
| 0.0833333129999971 | 0.1817300920000022 | 0.4673556090000019 | F | F | F |
| 0.0833333129999971 | 0.6817300319999973 | 0.4673556090000019 | F | F | F |
| 0.4166666870000029 | 0.1817300920000022 | 0.4673556090000019 | F | F | F |
| 0.4166666870000029 | 0.6817300319999973 | 0.4673556090000019 | F | F | F |
| 0.7500000000000000 | 0.1817300920000022 | 0.4673556090000019 | F | F | F |
| 0.7500000000000000 | 0.6817300319999973 | 0.4673556090000019 | F | F | F |
| 0.2500000000000000 | 0.3182699680000027 | 0.5326443909999981 | F | F | F |
| 0.2500000000000000 | 0.8182699079999978 | 0.5326443909999981 | F | F | F |
| 0.5833333129999971 | 0.3182699680000027 | 0.5326443909999981 | F | F | F |
| 0.5833333129999971 | 0.8182699079999978 | 0.5326443909999981 | F | F | F |
| 0.9166666870000029 | 0.3182699680000027 | 0.5326443909999981 | F | F | F |
| 0.9166666870000029 | 0.8182699079999978 | 0.5326443909999981 | F | F | F |
| 0.0851638256547247 | 0.4513880579879128 | 0.5994397926304131 | T | T | T |
| 0.081266777225542  | 0.9501092020622153 | 0.5996033048176557 | T | T | T |
| 0.4181397922860057 | 0.4514621585047962 | 0.5992692614688195 | T | T | T |
| 0.4139004682793086 | 0.9491536936086860 | 0.5992261353870560 | T | T | T |
| 0.7535275851811036 | 0.4514220036038665 | 0.5996226793627315 | T | T | T |
| 0.7480806418513382 | 0.9508217283395055 | 0.5993833122538419 | T | T | T |
| 0.7498407471444111 | 0.6763815855700273 | 0.3554608125661929 | T | T | T |
| 0.4614857374934900 | 0.6631132011340313 | 0.3071282293827053 | T | T | T |
| 0.4878473968287338 | 0.3732448176994296 | 0.3592460228194696 | T | T | T |
| 0.8094191059115161 | 0.3759923714449798 | 0.3632926664610920 | T | T | T |
| 0.7532396849911578 | 0.0486734602596925 | 0.3347669805033817 | T | T | T |
| 0.0782991977434335 | 0.5440182586916720 | 0.3350996593422551 | T | T | T |
| 0.1247160220972319 | 0.3723237196015461 | 0.3672560860257690 | T | T | T |
| 0.0217447977504222 | 0.8717615734485875 | 0.3637083748971932 | T | T | T |
| 0.4230448469975414 | 0.0388795945705951 | 0.3357356784073389 | T | T | T |
| 0.3352217664031940 | 0.8622201741678523 | 0.3583497302447753 | T | T | T |
| 0.0876716138443783 | 0.0426977415242007 | 0.3353364971829933 | T | T | T |
| 0.7137699955935375 | 0.8805113695258555 | 0.3683321177855134 | T | T | T |
| 0.2493409772550237 | 0.3048898386493164 | 0.4002646518466335 | T | T | T |
| 0.2444481618404453 | 0.8019317274290643 | 0.4015123807006873 | T | T | T |
| 0.5837995538565082 | 0.3023691709423346 | 0.4006292630169241 | T | T | T |
| 0.5828983797300751 | 0.8118586703891779 | 0.3985051444765304 | T | T | T |
| 0.9167610124727119 | 0.2962524732765175 | 0.4031963878148730 | T | T | T |
| 0.9158050795904913 | 0.7936712820616592 | 0.4046584613184550 | T | T | T |
| 0.0833333129999971 | 0.4317300920000022 | 0.4673556090000019 | F | F | F |
| 0.0833333129999971 | 0.9317300920000022 | 0.4673556090000019 | F | F | F |
| 0.4166666870000029 | 0.4317300920000022 | 0.4673556090000019 | F | F | F |
| 0.4166666870000029 | 0.9317300920000022 | 0.4673556090000019 | F | F | F |
| 0.7500000000000000 | 0.4317300920000022 | 0.4673556090000019 | F | F | F |
| 0.7500000000000000 | 0.9317300920000022 | 0.4673556090000019 | F | F | F |
| 0.2500000000000000 | 0.0682699079999978 | 0.5326443909999981 | F | F | F |
| 0.2500000000000000 | 0.5682699079999978 | 0.5326443909999981 | F | F | F |
| 0.5833333129999971 | 0.0682699079999978 | 0.5326443909999981 | F | F | F |
| 0.5833333129999971 | 0.5682699079999978 | 0.5326443909999981 | F | F | F |
| 0.9166666870000029 | 0.0682699079999978 | 0.5326443909999981 | F | F | F |

|                    |                    |                    |   |   |   |
|--------------------|--------------------|--------------------|---|---|---|
| 0.9166666870000029 | 0.5682699079999978 | 0.5326443909999981 | F | F | F |
| 0.0841949204095087 | 0.2063287179383408 | 0.5953415386815450 | T | T | T |
| 0.0832389875272881 | 0.7037475267234825 | 0.5968036121851270 | T | T | T |
| 0.4171016202699320 | 0.1881413296108221 | 0.6014948555234696 | T | T | T |
| 0.4162004461434918 | 0.6976308290576654 | 0.5993707369830759 | T | T | T |
| 0.7555518381595547 | 0.1980682725709357 | 0.5984876192993127 | T | T | T |
| 0.7506590227449763 | 0.6951101613506836 | 0.5997353481533665 | T | T | T |
| 0.2862300044064625 | 0.1194886304741445 | 0.6316678822144866 | T | T | T |
| 0.9123283861556217 | 0.9573022584757993 | 0.6646635028170067 | T | T | T |
| 0.6647782335968060 | 0.1377798258321477 | 0.6416502697552247 | T | T | T |
| 0.5769551530024586 | 0.9611204054294049 | 0.6642643215926682 | T | T | T |
| 0.9782552022495778 | 0.1282384265514125 | 0.6362916251028068 | T | T | T |
| 0.8752839779027681 | 0.6276762803984539 | 0.6327439139742310 | T | T | T |
| 0.9217008022565665 | 0.4559817413083280 | 0.6649003406577449 | T | T | T |
| 0.2467603150088422 | 0.9513265397403075 | 0.6652330194966183 | T | T | T |
| 0.1905808940884839 | 0.6240076285550202 | 0.6367073335389080 | T | T | T |
| 0.5121526031712662 | 0.6267551823005704 | 0.6407539771805304 | T | T | T |
| 0.5385142625065100 | 0.3368867988659687 | 0.6928717706172947 | T | T | T |
| 0.2501592528555889 | 0.3236184144299727 | 0.6445391874338071 | T | T | T |
| 0.4178154453803273 | 0.6898083607642320 | 0.3358275116305265 | T | T | T |
| 0.4157032643830618 | 0.5724056205726242 | 0.3594824605024129 | T | T | T |
| 0.7486317831755827 | 0.5872296756876310 | 0.3598774930761337 | T | T | T |
| 0.2362228114172353 | 0.3823717781318052 | 0.3762768186519878 | T | T | T |
| 0.5854157955375285 | 0.3817993713526491 | 0.3763505114980674 | T | T | T |
| 0.7524746007448044 | 0.1002406139509375 | 0.3614611279263684 | T | T | T |
| 0.0802934218927334 | 0.5974453926727534 | 0.3613087076459394 | T | T | T |
| 0.4190470094100220 | 0.0951640122069648 | 0.3611168773043474 | T | T | T |
| 0.2434797267126285 | 0.8830409102206218 | 0.3766346113771917 | T | T | T |
| 0.0854531128408524 | 0.0974006457488201 | 0.3611963647252310 | T | T | T |
| 0.5996531818023172 | 0.8869578827529736 | 0.3755005258756015 | T | T | T |
| 0.9143902526486656 | 0.3842417567256575 | 0.3769376644245170 | T | T | T |
| 0.9162523709635337 | 0.8844283894411760 | 0.3766128089321015 | T | T | T |
| 0.2511287034592016 | 0.2076108509348913 | 0.4267470901096573 | T | T | T |
| 0.2497142390822233 | 0.7078215062339481 | 0.4263355446725754 | T | T | T |
| 0.5833255859202993 | 0.2085274414531071 | 0.4269237231383158 | T | T | T |
| 0.5822843942941205 | 0.7076971647500443 | 0.4261566130763370 | T | T | T |
| 0.9174435766730227 | 0.2091508924903138 | 0.4266200906373143 | T | T | T |
| 0.9159334775031951 | 0.7087316954633707 | 0.4264910817208616 | T | T | T |
| 0.0844785293009807 | 0.0197744471815184 | 0.4420290879789945 | T | T | T |
| 0.0818413006022993 | 0.5198688461132903 | 0.4420252843852737 | T | T | T |
| 0.4185371609150792 | 0.0193105685821209 | 0.4419679837223782 | T | T | T |
| 0.4146105799794242 | 0.5189614087749206 | 0.4417743457506376 | T | T | T |
| 0.7519635939228877 | 0.0202803577621324 | 0.4420765802846631 | T | T | T |
| 0.7492373229526166 | 0.5197242400227751 | 0.4421989728760778 | T | T | T |
| 0.0833333129999971 | 0.3437488080000008 | 0.4914442899999969 | F | F | F |
| 0.0833333129999971 | 0.8437487779999984 | 0.4914442899999969 | F | F | F |
| 0.4166666870000029 | 0.3437488080000008 | 0.4914442899999969 | F | F | F |
| 0.4166666870000029 | 0.8437487779999984 | 0.4914442899999969 | F | F | F |
| 0.7500000000000000 | 0.3437488080000008 | 0.4914442899999969 | F | F | F |
| 0.7500000000000000 | 0.8437487779999984 | 0.4914442899999969 | F | F | F |
| 0.2500000000000000 | 0.1562512220000016 | 0.5085557100000031 | F | F | F |
| 0.2500000000000000 | 0.6562511919999992 | 0.5085557100000031 | F | F | F |
| 0.5833333129999971 | 0.1562512220000016 | 0.5085557100000031 | F | F | F |
| 0.5833333129999971 | 0.6562511919999992 | 0.5085557100000031 | F | F | F |
| 0.9166666870000029 | 0.1562512220000016 | 0.5085557100000031 | F | F | F |
| 0.9166666870000029 | 0.6562511919999992 | 0.5085557100000031 | F | F | F |
| 0.2507626770473834 | 0.4802757599772249 | 0.5578010271239222 | T | T | T |
| 0.2480364060771123 | 0.9797196422378676 | 0.5579234197153369 | T | T | T |
| 0.5853894200205758 | 0.4810385912250794 | 0.5582256542493624 | T | T | T |
| 0.5814628390849208 | 0.9806894314178791 | 0.5580320162776218 | T | T | T |
| 0.9181586993977007 | 0.4801311538867097 | 0.5579747156147263 | T | T | T |
| 0.9155214706990193 | 0.9802255528184816 | 0.5579709120210055 | T | T | T |
| 0.0840665224968049 | 0.2912683045366293 | 0.5735089182791384 | T | T | T |

|                    |                    |                    |       |
|--------------------|--------------------|--------------------|-------|
| 0.0825564233269773 | 0.7908491075096933 | 0.5733799093626857 | T T T |
| 0.4177156057058795 | 0.2923028352499557 | 0.5738433869236630 | T T T |
| 0.4166744140797007 | 0.7914725585468929 | 0.5730762768616842 | T T T |
| 0.7502857609177767 | 0.2921784937660519 | 0.5736644553274246 | T T T |
| 0.7488712965407984 | 0.7923891490651087 | 0.5732529098903427 | T T T |
| 0.0837476290364663 | 0.1155716105588240 | 0.6233871910678985 | T T T |
| 0.0856097473513344 | 0.6157582432743425 | 0.6230623355754830 | T T T |
| 0.4003468181976828 | 0.1130421172470264 | 0.6244994741243985 | T T T |
| 0.9145468871591476 | 0.9025993542511799 | 0.6388036352747761 | T T T |
| 0.7565202732873715 | 0.1169590897793782 | 0.6233653886228083 | T T T |
| 0.5809529905899780 | 0.9048359877930352 | 0.6388831226956526 | T T T |
| 0.9197065781072666 | 0.4025546073272466 | 0.6386912923540606 | T T T |
| 0.2475253992551956 | 0.8997593860490625 | 0.6385388720736316 | T T T |
| 0.4145842044624715 | 0.6182006286473509 | 0.6236494885019326 | T T T |
| 0.7637771885827647 | 0.6176282218681948 | 0.6237231813480122 | T T T |
| 0.2513682168244173 | 0.4127703243123690 | 0.6401225069238663 | T T T |
| 0.5842967356169382 | 0.4275943794273758 | 0.6405175394975871 | T T T |
| 0.5821845546196727 | 0.3101916392357680 | 0.6641724883694735 | T T T |

D

|                    |                     |                     |  |
|--------------------|---------------------|---------------------|--|
| 1.0000000000000000 |                     |                     |  |
| 8.5086002349999994 | 0.0000000000000000  | 0.0000000000000000  |  |
| 0.0000000000000000 | 10.8548107146999993 | 0.0000000000000000  |  |
| 0.0000000000000000 | 0.0000000000000000  | 30.0000000000000000 |  |

Co H O

24 46 62

Selective dynamics

Direct

|                    |                    |                    |       |
|--------------------|--------------------|--------------------|-------|
| 0.2478777435493745 | 0.0452352485011614 | 0.3999165529630372 | T T T |
| 0.2513994349344472 | 0.5518808590135362 | 0.3997349425685640 | T T T |
| 0.5810977051083245 | 0.0489870707886507 | 0.4008056567829412 | T T T |
| 0.5855040945741332 | 0.5512220761803769 | 0.4004351223470803 | T T T |
| 0.9143893301927947 | 0.0470908651315313 | 0.4002187897172034 | T T T |
| 0.9181645090549898 | 0.5505037953566683 | 0.4001732385113794 | T T T |
| 0.0833333129999971 | 0.1817300920000022 | 0.4673556090000019 | F F F |
| 0.0833333129999971 | 0.6817300319999973 | 0.4673556090000019 | F F F |
| 0.4166666870000029 | 0.1817300920000022 | 0.4673556090000019 | F F F |
| 0.4166666870000029 | 0.6817300319999973 | 0.4673556090000019 | F F F |
| 0.7500000000000000 | 0.1817300920000022 | 0.4673556090000019 | F F F |
| 0.7500000000000000 | 0.6817300319999973 | 0.4673556090000019 | F F F |
| 0.2500000000000000 | 0.3182699680000027 | 0.5326443909999981 | F F F |
| 0.2500000000000000 | 0.8182699079999978 | 0.5326443909999981 | F F F |
| 0.5833333129999971 | 0.3182699680000027 | 0.5326443909999981 | F F F |
| 0.5833333129999971 | 0.8182699079999978 | 0.5326443909999981 | F F F |
| 0.9166666870000029 | 0.3182699680000027 | 0.5326443909999981 | F F F |
| 0.9166666870000029 | 0.8182699079999978 | 0.5326443909999981 | F F F |
| 0.0818354909450102 | 0.4494962046433317 | 0.5998267614886206 | T T T |
| 0.0856106698072053 | 0.9529091348684687 | 0.5997812102827965 | T T T |
| 0.4144959054258668 | 0.4487779238196231 | 0.5995648776529197 | T T T |
| 0.4189022948916755 | 0.9510129292113493 | 0.5991943432170588 | T T T |
| 0.7486005650655528 | 0.4481191409864638 | 0.6002650574314361 | T T T |
| 0.7521222564506256 | 0.9547647514988314 | 0.6000834470369628 | T T T |
| 0.7144595758612842 | 0.3783957590187046 | 0.3692032900363056 | T T T |
| 0.4193177861478724 | 0.5377654775121603 | 0.3364798680891531 | T T T |
| 0.7522873020678478 | 0.5511417334116838 | 0.3347337621494146 | T T T |
| 0.7442633891267144 | 0.0429545740747680 | 0.3349504248716692 | T T T |
| 0.0966238937532083 | 0.5403676145652496 | 0.3363597137744022 | T T T |
| 0.9822204043310124 | 0.3687628824171306 | 0.3534643796184933 | T T T |
| 0.1430361084818146 | 0.8695377536157716 | 0.3634682889861399 | T T T |
| 0.4141948834956867 | 0.0437580731759150 | 0.3345740298947079 | T T T |
| 0.4691608806133536 | 0.8713671935269253 | 0.3642527723798228 | T T T |
| 0.0785723280897604 | 0.0431012412713325 | 0.3342963889698824 | T T T |
| 0.8158319705811423 | 0.8683972522200315 | 0.3613889819384535 | T T T |

|                    |                    |                    |   |   |   |
|--------------------|--------------------|--------------------|---|---|---|
| 0.2509136158175825 | 0.2767930578436587 | 0.4043705197307915 | T | T | T |
| 0.2522409617577193 | 0.7964395058645538 | 0.4034478160386474 | T | T | T |
| 0.5779002507885561 | 0.3153516237353174 | 0.3967041974974596 | T | T | T |
| 0.5852860955531547 | 0.8062695187847820 | 0.3999331681512843 | T | T | T |
| 0.9152287250025033 | 0.2907701303841472 | 0.4040208785406095 | T | T | T |
| 0.9188987137195165 | 0.7983769505992889 | 0.4024885768712363 | T | T | T |
| 0.0833333129999971 | 0.4317300920000022 | 0.4673556090000019 | F | F | F |
| 0.0833333129999971 | 0.9317300920000022 | 0.4673556090000019 | F | F | F |
| 0.4166666870000029 | 0.4317300920000022 | 0.4673556090000019 | F | F | F |
| 0.4166666870000029 | 0.9317300920000022 | 0.4673556090000019 | F | F | F |
| 0.7500000000000000 | 0.4317300920000022 | 0.4673556090000019 | F | F | F |
| 0.7500000000000000 | 0.9317300920000022 | 0.4673556090000019 | F | F | F |
| 0.2500000000000000 | 0.0682699079999978 | 0.5326443909999981 | F | F | F |
| 0.2500000000000000 | 0.5682699079999978 | 0.5326443909999981 | F | F | F |
| 0.5833333129999971 | 0.0682699079999978 | 0.5326443909999981 | F | F | F |
| 0.5833333129999971 | 0.5682699079999978 | 0.5326443909999981 | F | F | F |
| 0.9166666870000029 | 0.0682699079999978 | 0.5326443909999981 | F | F | F |
| 0.9166666870000029 | 0.5682699079999978 | 0.5326443909999981 | F | F | F |
| 0.0811012862804836 | 0.2016230494007111 | 0.5975114231287637 | T | T | T |
| 0.0847712749974967 | 0.7092298696158528 | 0.5959791214593906 | T | T | T |
| 0.4147139044468452 | 0.1937304812152180 | 0.6000668318487157 | T | T | T |
| 0.4220997492114438 | 0.6846483762646826 | 0.6032958025025404 | T | T | T |
| 0.7477590382422807 | 0.2035604941354462 | 0.5965521839613527 | T | T | T |
| 0.7490863841824175 | 0.7232069421563414 | 0.5956294802692085 | T | T | T |
| 0.1841680294188577 | 0.1316027477799686 | 0.6386110180615465 | T | T | T |
| 0.9214276719102397 | 0.9568987587286675 | 0.6657036110301177 | T | T | T |
| 0.5308391193866464 | 0.1286328064730747 | 0.6357472276201772 | T | T | T |
| 0.5858051165043133 | 0.9562419268240850 | 0.6654259701052920 | T | T | T |
| 0.8569638915181854 | 0.1304622463842285 | 0.6365317110138601 | T | T | T |
| 0.0177795956689876 | 0.6312371175828694 | 0.6465356203815068 | T | T | T |
| 0.9033761062467917 | 0.4596323854347504 | 0.6636402862255978 | T | T | T |
| 0.2557366108732855 | 0.9570454259252320 | 0.6650495751283308 | T | T | T |
| 0.2477126979321522 | 0.4488582665883162 | 0.6652662378505854 | T | T | T |
| 0.5806822138521277 | 0.4622345224878397 | 0.6635201319108468 | T | T | T |
| 0.2855404241387159 | 0.6216042409812954 | 0.6307967099636944 | T | T | T |
| 0.2134691775474180 | 0.3873691685916436 | 0.3327484570737905 | T | T | T |
| 0.4186951878878433 | 0.5978930987794049 | 0.3608369016453168 | T | T | T |
| 0.7519710590894833 | 0.6019732276227854 | 0.3616292982001343 | T | T | T |
| 0.2505827529979053 | 0.3956497608293892 | 0.3758992373950062 | T | T | T |
| 0.5977162164076718 | 0.3877369175192648 | 0.3743115004875438 | T | T | T |
| 0.7479657886495286 | 0.0952316198480565 | 0.3614512191864014 | T | T | T |
| 0.0847495764209341 | 0.5993810451537527 | 0.3611497001171967 | T | T | T |
| 0.4140673698540520 | 0.0946207021923059 | 0.3614498617101800 | T | T | T |
| 0.2484842959655629 | 0.8823087946584982 | 0.3763414920678896 | T | T | T |
| 0.0812581260326835 | 0.0937671414749817 | 0.3612116223345651 | T | T | T |
| 0.5772976520046541 | 0.8828104174615198 | 0.3756083332369106 | T | T | T |
| 0.9057393429714523 | 0.3848780719732473 | 0.3771025543909772 | T | T | T |
| 0.9165976363160471 | 0.8823548464800289 | 0.3765497669505614 | T | T | T |
| 0.2496536713726278 | 0.2056449819768320 | 0.4260668348887697 | T | T | T |
| 0.2509615740524190 | 0.7102645896194500 | 0.4270061724003327 | T | T | T |
| 0.5819202626515080 | 0.2076485378410634 | 0.4268511321136770 | T | T | T |
| 0.5837070130165045 | 0.7091210247611409 | 0.4269948665085000 | T | T | T |
| 0.9168623070989649 | 0.2076764670977022 | 0.4263887227849897 | T | T | T |
| 0.9178326423386846 | 0.7091311916688565 | 0.4267861689629754 | T | T | T |
| 0.0818590183629124 | 0.0189977402381669 | 0.4420081611039749 | T | T | T |
| 0.0849203171371157 | 0.5200363899960776 | 0.4418059393690148 | T | T | T |
| 0.4145361842621941 | 0.0190000595381067 | 0.4421066582734970 | T | T | T |
| 0.4174366758732442 | 0.5193211900638617 | 0.4416134984044252 | T | T | T |
| 0.7487272558090550 | 0.0193553904732248 | 0.4421128483079183 | T | T | T |
| 0.7514553057400817 | 0.5202617967437613 | 0.4419757951755212 | T | T | T |
| 0.0833333129999971 | 0.3437488080000008 | 0.4914442899999969 | F | F | F |
| 0.0833333129999971 | 0.8437487779999984 | 0.4914442899999969 | F | F | F |
| 0.4166666870000029 | 0.3437488080000008 | 0.4914442899999969 | F | F | F |

|                    |                    |                    |   |   |   |
|--------------------|--------------------|--------------------|---|---|---|
| 0.4166666870000029 | 0.8437487779999984 | 0.4914442899999969 | F | F | F |
| 0.7500000000000000 | 0.3437488080000008 | 0.4914442899999969 | F | F | F |
| 0.7500000000000000 | 0.8437487779999984 | 0.4914442899999969 | F | F | F |
| 0.2500000000000000 | 0.1562512220000016 | 0.5085557100000031 | F | F | F |
| 0.2500000000000000 | 0.6562511919999992 | 0.5085557100000031 | F | F | F |
| 0.5833333129999971 | 0.1562512220000016 | 0.5085557100000031 | F | F | F |
| 0.5833333129999971 | 0.6562511919999992 | 0.5085557100000031 | F | F | F |
| 0.9166666870000029 | 0.1562512220000016 | 0.5085557100000031 | F | F | F |
| 0.9166666870000029 | 0.6562511919999992 | 0.5085557100000031 | F | F | F |
| 0.2485446942599183 | 0.4797382032562387 | 0.5580242048244788 | T | T | T |
| 0.2512727441909450 | 0.9806446095267752 | 0.5578871516920888 | T | T | T |
| 0.5825633241267558 | 0.4806788099361383 | 0.5583865015955748 | T | T | T |
| 0.5854638157378058 | 0.9809999404618933 | 0.5578933417265031 | T | T | T |
| 0.9150796828628843 | 0.4799636100039296 | 0.5581940606309852 | T | T | T |
| 0.9181409816370877 | 0.9810022597618331 | 0.5579918388960251 | T | T | T |
| 0.0821673576613154 | 0.2908688083311435 | 0.5732138310370245 | T | T | T |
| 0.0831376929010351 | 0.7923235329023048 | 0.5736112772150103 | T | T | T |
| 0.4162929869834954 | 0.2908789752388591 | 0.5730051334915000 | T | T | T |
| 0.4180797373484920 | 0.7923514621589366 | 0.5731488678863230 | T | T | T |
| 0.7490384259475810 | 0.2897354103805500 | 0.5729938275996673 | T | T | T |
| 0.7503463286273722 | 0.7943550180231680 | 0.5739331651112304 | T | T | T |
| 0.0834023636839529 | 0.1176451535199710 | 0.6234502330494386 | T | T | T |
| 0.0942606570285548 | 0.6151219280267527 | 0.6228974456090228 | T | T | T |
| 0.4227023479953459 | 0.1171895825384803 | 0.6243916667630893 | T | T | T |
| 0.9187418739673165 | 0.9062328585250183 | 0.6387883776654349 | T | T | T |
| 0.7515157040344442 | 0.1176912053415018 | 0.6236585079321104 | T | T | T |
| 0.5859326301459481 | 0.9053792978076941 | 0.6385501382898200 | T | T | T |
| 0.9152504235790658 | 0.4006189548462473 | 0.6388502998828034 | T | T | T |
| 0.2520342113504714 | 0.9047683801519435 | 0.6385487808135986 | T | T | T |
| 0.4022837835923282 | 0.6122630824807352 | 0.6256884995124562 | T | T | T |
| 0.7494172470020948 | 0.6043502391706108 | 0.6241007626049938 | T | T | T |
| 0.2480289409105167 | 0.3980267723772146 | 0.6383707017998657 | T | T | T |
| 0.5813048121121568 | 0.4021069012205951 | 0.6391630983546831 | T | T | T |
| 0.7865308224525820 | 0.6126308314083564 | 0.6672515429262095 | T | T | T |

D'

|                    |                     |                     |
|--------------------|---------------------|---------------------|
| 1.0000000000000000 |                     |                     |
| 8.5086002349999994 | 0.0000000000000000  | 0.0000000000000000  |
| 0.0000000000000000 | 10.8548107146999993 | 0.0000000000000000  |
| 0.0000000000000000 | 0.0000000000000000  | 30.0000000000000000 |

Co H O

24 46 62

Selective dynamics

Direct

|                    |                    |                    |   |   |   |
|--------------------|--------------------|--------------------|---|---|---|
| 0.5837971175846481 | 0.5490430669991950 | 0.4005438438217807 | T | T | T |
| 0.2456551849992202 | 0.5496583134084569 | 0.4006418116145298 | T | T | T |
| 0.5848202803004906 | 0.0512575787647858 | 0.4006955970518997 | T | T | T |
| 0.2516394036251018 | 0.0501157236196996 | 0.4005208861517681 | T | T | T |
| 0.9177308573930011 | 0.0495552450402088 | 0.4003162351819236 | T | T | T |
| 0.9154597759618794 | 0.5485671965993498 | 0.4006191922368007 | T | T | T |
| 0.0833333129999971 | 0.1817300920000022 | 0.4673556090000019 | F | F | F |
| 0.0833333129999971 | 0.6817300319999973 | 0.4673556090000019 | F | F | F |
| 0.4166666870000029 | 0.1817300920000022 | 0.4673556090000019 | F | F | F |
| 0.4166666870000029 | 0.6817300319999973 | 0.4673556090000019 | F | F | F |
| 0.7500000000000000 | 0.1817300920000022 | 0.4673556090000019 | F | F | F |
| 0.7500000000000000 | 0.6817300319999973 | 0.4673556090000019 | F | F | F |
| 0.2500000000000000 | 0.3182699680000027 | 0.5326443909999981 | F | F | F |
| 0.2500000000000000 | 0.8182699079999978 | 0.5326443909999981 | F | F | F |
| 0.5833333129999971 | 0.3182699680000027 | 0.5326443909999981 | F | F | F |
| 0.5833333129999971 | 0.8182699079999978 | 0.5326443909999981 | F | F | F |
| 0.9166666870000029 | 0.3182699680000027 | 0.5326443909999981 | F | F | F |
| 0.9166666870000029 | 0.8182699079999978 | 0.5326443909999981 | F | F | F |
| 0.0845402240381205 | 0.4514328034006500 | 0.5993808077631994 | T | T | T |



|                     |                    |                    |   |   |   |
|---------------------|--------------------|--------------------|---|---|---|
| 0.0822691426069990  | 0.9504447549597911 | 0.5996837648180765 | T | T | T |
| 0.7483605963748979  | 0.9498842763803003 | 0.5994791138482320 | T | T | T |
| 0.4151797196995093  | 0.9487424212352071 | 0.5993044029481002 | T | T | T |
| 0.7543448150007797  | 0.4503416865915428 | 0.5993581883854703 | T | T | T |
| 0.4162028824153516  | 0.4509569330008050 | 0.5994561561782191 | T | T | T |
| 0.7532957941188945  | 0.6731269491591813 | 0.3531894259752426 | T | T | T |
| 0.4830724756468421  | 0.3716617029520810 | 0.3601860141734581 | T | T | T |
| 0.8166819484723984  | 0.3753269285229152 | 0.3610433954680548 | T | T | T |
| 0.7521439998921196  | 0.0510880039157492 | 0.3344132105340091 | T | T | T |
| 0.0796510690386639  | 0.5468626310835911 | 0.3348968470788160 | T | T | T |
| 0.1313720937218338  | 0.3727146593575079 | 0.3655161875118413 | T | T | T |
| 0.0001232579248480  | 0.8688577193042093 | 0.3575837145790273 | T | T | T |
| 0.4212717118889098  | 0.0495485888674171 | 0.3345218210597546 | T | T | T |
| 0.3579618986110646  | 0.8731824982215426 | 0.3614815087586451 | T | T | T |
| 0.0882396747744425  | 0.0439180730723828 | 0.3349503833209528 | T | T | T |
| 0.7042960047412876  | 0.8793685986589108 | 0.3663764368570179 | T | T | T |
| 0.2505472262528446  | 0.3055539092232046 | 0.4004129299146157 | T | T | T |
| 0.2477305918092252  | 0.8082335871899091 | 0.3990373804915102 | T | T | T |
| 0.5840601409157067  | 0.3041880708396161 | 0.4004509142112165 | T | T | T |
| 0.5824032994510852  | 0.810577772298461  | 0.3995182562379835 | T | T | T |
| 0.9171893220220582  | 0.2984420936902534 | 0.4022749879208092 | T | T | T |
| 0.9153386730767203  | 0.7945880055406549 | 0.4038576537542117 | T | T | T |
| 0.0833333129999971  | 0.4317300920000022 | 0.4673556090000019 | F | F | F |
| 0.0833333129999971  | 0.9317300920000022 | 0.4673556090000019 | F | F | F |
| 0.4166666870000029  | 0.4317300920000022 | 0.4673556090000019 | F | F | F |
| 0.4166666870000029  | 0.9317300920000022 | 0.4673556090000019 | F | F | F |
| 0.7500000000000000  | 0.4317300920000022 | 0.4673556090000019 | F | F | F |
| 0.7500000000000000  | 0.9317300920000022 | 0.4673556090000019 | F | F | F |
| 0.2500000000000000  | 0.0682699079999978 | 0.5326443909999981 | F | F | F |
| 0.2500000000000000  | 0.5682699079999978 | 0.5326443909999981 | F | F | F |
| 0.5833333129999971  | 0.0682699079999978 | 0.5326443909999981 | F | F | F |
| 0.5833333129999971  | 0.5682699079999978 | 0.5326443909999981 | F | F | F |
| 0.9166666870000029  | 0.0682699079999978 | 0.5326443909999981 | F | F | F |
| 0.9166666870000029  | 0.5682699079999978 | 0.5326443909999981 | F | F | F |
| 0.0846613269232797  | 0.2054119944593450 | 0.5961423462457882 | T | T | T |
| 0.082810677979419   | 0.7015579063097468 | 0.5977250120791978 | T | T | T |
| 0.4175967005489218  | 0.1894222227701539 | 0.6004817437620165 | T | T | T |
| 0.4159398590842934  | 0.6958119291603839 | 0.5995490857887837 | T | T | T |
| 0.7522694081907746  | 0.1917664128100909 | 0.6009626195084902 | T | T | T |
| 0.7494527737471622  | 0.6944460907767953 | 0.5995870700853843 | T | T | T |
| 0.2957039952587124  | 0.1206314013410893 | 0.6336235631429822 | T | T | T |
| 0.9117603252255573  | 0.9560819269276174 | 0.6650496166790473 | T | T | T |
| 0.6420381013889352  | 0.1268175017784575 | 0.6385184912413550 | T | T | T |
| 0.5787282881110901  | 0.9504514111325831 | 0.6654781789402454 | T | T | T |
| -0.0001232579248480 | 0.1311422806957906 | 0.6424162854209726 | T | T | T |
| 0.8686279062781660  | 0.6272853406424923 | 0.6344838124881585 | T | T | T |
| 0.9203489309613360  | 0.4531373689164088 | 0.6651031529211839 | T | T | T |
| 0.2478560001078806  | 0.9489119960842505 | 0.6655867894659910 | T | T | T |
| 0.1833180515276015  | 0.6246730714770848 | 0.6389566045319452 | T | T | T |
| 0.5169275243531578  | 0.6283382970479189 | 0.6398139858265420 | T | T | T |
| 0.2467042058811054  | 0.3268730508408187 | 0.6468105740247574 | T | T | T |
| 0.4126090706195017  | 0.5752005212354953 | 0.3190808583424802 | T | T | T |
| 0.4143251991034402  | 0.5895592774627900 | 0.3626880301543530 | T | T | T |
| 0.7501580051181952  | 0.5850696023903865 | 0.3598230852825470 | T | T | T |
| 0.2407063895727622  | 0.3838223364646473 | 0.3762394620923917 | T | T | T |
| 0.5828409492508476  | 0.3828470862080002 | 0.3761397605322758 | T | T | T |
| 0.7513704116403569  | 0.1004796798579832 | 0.3616488536012438 | T | T | T |
| 0.0805400995123312  | 0.5986146036809252 | 0.3615773643260934 | T | T | T |
| 0.4184672541775321  | 0.0994569543208463 | 0.3616163596485024 | T | T | T |
| 0.2538397038999848  | 0.8841226406815810 | 0.3751242059724193 | T | T | T |
| 0.0847560719407820  | 0.0968305728399318 | 0.3612824684446753 | T | T | T |
| 0.5914317285462909  | 0.8851656538798537 | 0.3753785942805957 | T | T | T |
| 0.9174372971668151  | 0.3836871555110709 | 0.3768735904726810 | T | T | T |

|                    |                    |                    |       |
|--------------------|--------------------|--------------------|-------|
| 0.9083383419579772 | 0.8832152983720090 | 0.3765726833319155 | T T T |
| 0.2505752354123910 | 0.2084352542417330 | 0.4267460868720287 | T T T |
| 0.2492256670723432 | 0.7083545302863898 | 0.4265758163513081 | T T T |
| 0.5836292265144065 | 0.2089452252120457 | 0.4269280151443013 | T T T |
| 0.5833754935091103 | 0.7080036200495934 | 0.4263036387324824 | T T T |
| 0.9173979682863707 | 0.2087097191328141 | 0.4265927952160127 | T T T |
| 0.9160446217539054 | 0.7086485970717142 | 0.4264690509471231 | T T T |
| 0.0843440792754594 | 0.0194138526044067 | 0.4418806190221292 | T T T |
| 0.0816468793387343 | 0.5196912889083257 | 0.4421527369216353 | T T T |
| 0.4179312010642823 | 0.0197269448945232 | 0.4419689832330674 | T T T |
| 0.4153616152048057 | 0.5194284199343235 | 0.4416365713135122 | T T T |
| 0.7510377165616712 | 0.0200057038273541 | 0.4420110497222765 | T T T |
| 0.7492791401174949 | 0.5193846728919969 | 0.4420532790640028 | T T T |
| 0.0833333129999971 | 0.3437488080000008 | 0.4914442899999969 | F F F |
| 0.0833333129999971 | 0.8437487779999984 | 0.4914442899999969 | F F F |
| 0.4166666870000029 | 0.3437488080000008 | 0.4914442899999969 | F F F |
| 0.4166666870000029 | 0.8437487779999984 | 0.4914442899999969 | F F F |
| 0.7500000000000000 | 0.3437488080000008 | 0.4914442899999969 | F F F |
| 0.7500000000000000 | 0.8437487779999984 | 0.4914442899999969 | F F F |
| 0.2500000000000000 | 0.1562512220000016 | 0.5085557100000031 | F F F |
| 0.2500000000000000 | 0.6562511919999992 | 0.5085557100000031 | F F F |
| 0.5833333129999971 | 0.1562512220000016 | 0.5085557100000031 | F F F |
| 0.5833333129999971 | 0.6562511919999992 | 0.5085557100000031 | F F F |
| 0.9166666870000029 | 0.1562512220000016 | 0.5085557100000031 | F F F |
| 0.9166666870000029 | 0.6562511919999992 | 0.5085557100000031 | F F F |
| 0.2507208598825050 | 0.4806153271080033 | 0.5579467209359974 | T T T |
| 0.2489622834383290 | 0.9799942961726390 | 0.5579889502777237 | T T T |
| 0.5846383847952010 | 0.4805715800656767 | 0.5583634286864877 | T T T |
| 0.5820687989357178 | 0.9802730551054768 | 0.5580310167669328 | T T T |
| 0.9183531206612657 | 0.4803087110916742 | 0.5578472630783646 | T T T |
| 0.9156559207245405 | 0.9805861473955932 | 0.5581193809778708 | T T T |
| 0.0839553782460946 | 0.2913514029282858 | 0.5735309490528765 | T T T |
| 0.0826020317136294 | 0.7912902808671859 | 0.5734072047839874 | T T T |
| 0.4166245064908899 | 0.2919963799504066 | 0.5736963612675173 | T T T |
| 0.4163707734855935 | 0.7910547747879543 | 0.5730719848556987 | T T T |
| 0.7507743329276567 | 0.2916454697136102 | 0.5734241836486916 | T T T |
| 0.7494247645876088 | 0.7915647457582670 | 0.5732539131279716 | T T T |
| 0.0916616580420225 | 0.1167847016279911 | 0.6234273166680846 | T T T |
| 0.0825627028331850 | 0.6163128444889292 | 0.6231264095273190 | T T T |
| 0.4085682714537092 | 0.1148343461201463 | 0.6246214057194042 | T T T |
| 0.9152439280592181 | 0.9031694271600682 | 0.6387175315553247 | T T T |
| 0.7461602961000151 | 0.1158773593184187 | 0.6248757940275809 | T T T |
| 0.5815327458224681 | 0.9005430456791540 | 0.6383836403514975 | T T T |
| 0.9194599004876686 | 0.4013853963190748 | 0.6384226356739069 | T T T |
| 0.2486295883596433 | 0.8995203201420169 | 0.6383511463987562 | T T T |
| 0.4171590507491455 | 0.6171529137919995 | 0.6238602394677242 | T T T |
| 0.7592936104272379 | 0.6161776635353527 | 0.6237605379076081 | T T T |
| 0.2498419948818043 | 0.4149303976096134 | 0.6401769147174530 | T T T |
| 0.5856748008965595 | 0.4104407225372170 | 0.6373119698456470 | T T T |
| 0.5873909293804983 | 0.4247994787645047 | 0.6809191416575199 | T T T |

E'

|                    |                     |                     |
|--------------------|---------------------|---------------------|
| 1.0000000000000000 |                     |                     |
| 8.5086002349999994 | 0.0000000000000000  | 0.0000000000000000  |
| 0.0000000000000000 | 10.8548107146999993 | 0.0000000000000000  |
| 0.0000000000000000 | 0.0000000000000000  | 30.0000000000000000 |

Co H O

24 46 58

Selective dynamics

Direct

|                    |                    |                    |       |
|--------------------|--------------------|--------------------|-------|
| 0.5823776894214771 | 0.5459562261277181 | 0.4015106171582076 | T T T |
| 0.2374161848332393 | 0.5321784069628400 | 0.3966221722586921 | T T T |
| 0.5862112112882818 | 0.0475086273339842 | 0.4000563746054877 | T T T |

|                    |                    |                    |   |   |   |
|--------------------|--------------------|--------------------|---|---|---|
| 0.2516282950183170 | 0.0491494735570643 | 0.3999251365822452 | T | T | T |
| 0.9193548158742346 | 0.0500747939749070 | 0.4007402953002808 | T | T | T |
| 0.9109855801775861 | 0.5496046945546991 | 0.4005778436590675 | T | T | T |
| 0.0833333129999971 | 0.1817300920000022 | 0.4673556090000019 | F | F | F |
| 0.0833333129999971 | 0.6817300319999973 | 0.4673556090000019 | F | F | F |
| 0.4166666870000029 | 0.1817300920000022 | 0.4673556090000019 | F | F | F |
| 0.4166666870000029 | 0.6817300319999973 | 0.4673556090000019 | F | F | F |
| 0.7500000000000000 | 0.1817300920000022 | 0.4673556090000019 | F | F | F |
| 0.7500000000000000 | 0.6817300319999973 | 0.4673556090000019 | F | F | F |
| 0.2500000000000000 | 0.3182699680000027 | 0.5326443909999981 | F | F | F |
| 0.2500000000000000 | 0.8182699079999978 | 0.5326443909999981 | F | F | F |
| 0.5833333129999971 | 0.3182699680000027 | 0.5326443909999981 | F | F | F |
| 0.5833333129999971 | 0.8182699079999978 | 0.5326443909999981 | F | F | F |
| 0.9166666870000029 | 0.3182699680000027 | 0.5326443909999981 | F | F | F |
| 0.9166666870000029 | 0.8182699079999978 | 0.5326443909999981 | F | F | F |
| 0.0893509333584322 | 0.4503343205971219 | 0.5994293882620031 | T | T | T |
| 0.0806237254080269 | 0.9498756716935606 | 0.5992425600187440 | T | T | T |
| 0.7484373688048375 | 0.9508505320821991 | 0.6000605863436597 | T | T | T |
| 0.4137486813678551 | 0.9524296114147619 | 0.5999560820364690 | T | T | T |
| 0.7629749904221254 | 0.4676825396701361 | 0.6033841942468330 | T | T | T |
| 0.4179435729850404 | 0.4539626637852237 | 0.5985009465815769 | T | T | T |
| 0.7371182321750598 | 0.5448551779778558 | 0.3346419438045859 | T | T | T |
| 0.4661234889531677 | 0.3721905157241527 | 0.3647114734741495 | T | T | T |
| 0.7839623870503860 | 0.3731486223997377 | 0.3679063919891080 | T | T | T |
| 0.7558167460392136 | 0.0438187659797586 | 0.3347296143921076 | T | T | T |
| 0.0500686761783931 | 0.5335494355228986 | 0.3315600782018786 | T | T | T |
| 0.1899419985183475 | 0.3420092571565816 | 0.3476528128872058 | T | T | T |
| 0.0369096439543364 | 0.8740553896568317 | 0.3665765501229411 | T | T | T |
| 0.4217600666113325 | 0.0386905816044050 | 0.3348232138195069 | T | T | T |
| 0.3362289457538145 | 0.8719977312830001 | 0.3582626787570942 | T | T | T |
| 0.0871875352053634 | 0.0440939847682775 | 0.3355354059825066 | T | T | T |
| 0.7041156267359980 | 0.8718332155012052 | 0.3655123053862756 | T | T | T |
| 0.2583462873420483 | 0.2851037794141703 | 0.3995649389026212 | T | T | T |
| 0.2467308340655946 | 0.7896134725642654 | 0.4074862516502927 | T | T | T |
| 0.5835413636560909 | 0.2869886518100513 | 0.4045536098149657 | T | T | T |
| 0.5833984557634250 | 0.8057157183228060 | 0.4000242294773950 | T | T | T |
| 0.9151155778643649 | 0.3092458163569344 | 0.3987219911940142 | T | T | T |
| 0.9162596598542665 | 0.8043317595557062 | 0.4007347306216169 | T | T | T |
| 0.0833333129999971 | 0.4317300920000022 | 0.4673556090000019 | F | F | F |
| 0.0833333129999971 | 0.9317300920000022 | 0.4673556090000019 | F | F | F |
| 0.4166666870000029 | 0.4317300920000022 | 0.4673556090000019 | F | F | F |
| 0.4166666870000029 | 0.9317300920000022 | 0.4673556090000019 | F | F | F |
| 0.7500000000000000 | 0.4317300920000022 | 0.4673556090000019 | F | F | F |
| 0.7500000000000000 | 0.9317300920000022 | 0.4673556090000019 | F | F | F |
| 0.2500000000000000 | 0.0682699079999978 | 0.5326443909999981 | F | F | F |
| 0.2500000000000000 | 0.5682699079999978 | 0.5326443909999981 | F | F | F |
| 0.5833333129999971 | 0.0682699079999978 | 0.5326443909999981 | F | F | F |
| 0.5833333129999971 | 0.5682699079999978 | 0.5326443909999981 | F | F | F |
| 0.9166666870000029 | 0.0682699079999978 | 0.5326443909999981 | F | F | F |
| 0.9166666870000029 | 0.5682699079999978 | 0.5326443909999981 | F | F | F |
| 0.0838213950820201 | 0.1957835213755015 | 0.5991889941900748 | T | T | T |
| 0.0852378253444084 | 0.6906273181887309 | 0.6012965729533980 | T | T | T |
| 0.4164104550405923 | 0.1937290527990485 | 0.6001539392810422 | T | T | T |
| 0.4165461977189088 | 0.7131299261391276 | 0.5954381698168982 | T | T | T |
| 0.7532785066502590 | 0.2104287370314050 | 0.5925676278048141 | T | T | T |
| 0.7418842856084754 | 0.7144323899466621 | 0.6006812644504275 | T | T | T |
| 0.2949402202806071 | 0.1277977787667629 | 0.6343924377157717 | T | T | T |
| 0.9127296600482142 | 0.9558817598515033 | 0.6644330438427646 | T | T | T |
| 0.6647650061199813 | 0.1280699893352191 | 0.6420207852257602 | T | T | T |
| 0.5783248913420824 | 0.9611867429117278 | 0.6651829432454538 | T | T | T |
| 0.9633302726549720 | 0.1259294440957249 | 0.6334272287549748 | T | T | T |
| 0.8095787035260329 | 0.6586109538857429 | 0.6525156533209425 | T | T | T |
| 0.9505792224885631 | 0.4658961279954417 | 0.6685073234520439 | T | T | T |

|                    |                    |                    |   |   |   |
|--------------------|--------------------|--------------------|---|---|---|
| 0.2440950544674858 | 0.9557730689427929 | 0.6652953977813254 | T | T | T |
| 0.2169170762643461 | 0.6267506565420560 | 0.6319529239110909 | T | T | T |
| 0.5343958216801776 | 0.6279311204594195 | 0.6352709813038361 | T | T | T |
| 0.2634485600210521 | 0.4551566461220257 | 0.6653490712694005 | T | T | T |
| 0.7377486616790531 | 0.5984474382335875 | 0.3608369236065883 | T | T | T |
| 0.2691697891936703 | 0.3662700405050041 | 0.3693962980043021 | T | T | T |
| 0.5766718116284650 | 0.3876450678460414 | 0.3748707669141973 | T | T | T |
| 0.7524495727977296 | 0.0964492037204754 | 0.3611340358876155 | T | T | T |
| 0.0671893016988054 | 0.5907783387532241 | 0.3561599050495999 | T | T | T |
| 0.4199378748384137 | 0.0935913354306008 | 0.3606205433195797 | T | T | T |
| 0.2403888151057646 | 0.8882887782708214 | 0.3751841697876186 | T | T | T |
| 0.0850664234913124 | 0.0996405039049613 | 0.3611790559130489 | T | T | T |
| 0.5943741007754797 | 0.8824780354122607 | 0.3756891195686246 | T | T | T |
| 0.8969128786269192 | 0.3839940786995463 | 0.3754554142552006 | T | T | T |
| 0.9248428821560786 | 0.8835658250849963 | 0.3760726815530547 | T | T | T |
| 0.2516032349826818 | 0.2086103012286425 | 0.4263394944457526 | T | T | T |
| 0.2503828505855601 | 0.7086019323042670 | 0.4264557833566796 | T | T | T |
| 0.5835475386188271 | 0.2077592899825417 | 0.4260773360803288 | T | T | T |
| 0.5817657182862856 | 0.7078517372892472 | 0.4263796024277622 | T | T | T |
| 0.9173959327639081 | 0.2083047608176636 | 0.4268843228728557 | T | T | T |
| 0.9158940344164082 | 0.7089105423072942 | 0.4264773659168069 | T | T | T |
| 0.0852841178660902 | 0.0198897883341775 | 0.4419264757488588 | T | T | T |
| 0.0732789378954503 | 0.5195368619106432 | 0.4431109848840097 | T | T | T |
| 0.4185832114376608 | 0.0190610104050460 | 0.4416862751643265 | T | T | T |
| 0.4180378197166680 | 0.5190371187023579 | 0.4409408370424686 | T | T | T |
| 0.7514610182866127 | 0.0195154128309149 | 0.4419015704220928 | T | T | T |
| 0.7555708535987350 | 0.5206485304647187 | 0.4441800900177548 | T | T | T |
| 0.0833333129999971 | 0.3437488080000008 | 0.4914442899999969 | F | F | F |
| 0.0833333129999971 | 0.8437487779999984 | 0.4914442899999969 | F | F | F |
| 0.4166666870000029 | 0.3437488080000008 | 0.4914442899999969 | F | F | F |
| 0.4166666870000029 | 0.8437487779999984 | 0.4914442899999969 | F | F | F |
| 0.7500000000000000 | 0.3437488080000008 | 0.4914442899999969 | F | F | F |
| 0.7500000000000000 | 0.8437487779999984 | 0.4914442899999969 | F | F | F |
| 0.2500000000000000 | 0.1562512220000016 | 0.5085557100000031 | F | F | F |
| 0.2500000000000000 | 0.6562511919999992 | 0.5085557100000031 | F | F | F |
| 0.5833333129999971 | 0.1562512220000016 | 0.5085557100000031 | F | F | F |
| 0.5833333129999971 | 0.6562511919999992 | 0.5085557100000031 | F | F | F |
| 0.9166666870000029 | 0.1562512220000016 | 0.5085557100000031 | F | F | F |
| 0.9166666870000029 | 0.6562511919999992 | 0.5085557100000031 | F | F | F |
| 0.2446654800168833 | 0.4793740160213648 | 0.5558269490948156 | T | T | T |
| 0.2485461431620421 | 0.9804709430815490 | 0.5580896710767032 | T | T | T |
| 0.5823058220145154 | 0.4810080190567292 | 0.5591119031365448 | T | T | T |
| 0.5813783199181243 | 0.9809766154853365 | 0.5583203455973970 | T | T | T |
| 0.9270160116345221 | 0.4804422502035187 | 0.5568778313069241 | T | T | T |
| 0.9147446291914482 | 0.9801227333341370 | 0.5580609224345142 | T | T | T |
| 0.0841284638037528 | 0.2910598493815009 | 0.5735226067564417 | T | T | T |
| 0.0826144761904296 | 0.7916377822723563 | 0.5731087414230069 | T | T | T |
| 0.4183242286209266 | 0.2921168592654787 | 0.5736151621575496 | T | T | T |
| 0.4164548988028895 | 0.7921888779919755 | 0.5739332121996726 | T | T | T |
| 0.7496993209624200 | 0.2914544242683893 | 0.5735574484449281 | T | T | T |
| 0.7484362660924320 | 0.7914204289059088 | 0.5736329339037223 | T | T | T |
| 0.0753604659499072 | 0.1163818834819655 | 0.6238897470979331 | T | T | T |
| 0.1038050992987323 | 0.6159129630466289 | 0.6245330380615427 | T | T | T |
| 0.4049725085078976 | 0.1173410587796910 | 0.6243985648254804 | T | T | T |
| 0.9149533151134630 | 0.9002619151173842 | 0.6388113422953541 | T | T | T |
| 0.7600077341493537 | 0.1117818604289696 | 0.6248408130306737 | T | T | T |
| 0.5800747079921278 | 0.9063480477912675 | 0.6393710895226747 | T | T | T |
| 0.9330504896455114 | 0.4090346396280117 | 0.6438212978389956 | T | T | T |
| 0.2474982436897390 | 0.9033355419236609 | 0.6388431199461261 | T | T | T |
| 0.4238089879086807 | 0.6121256433332291 | 0.6251963782698732 | T | T | T |
| 0.7312302282100210 | 0.6340262843608844 | 0.6305542178290042 | T | T | T |
| 0.2625791126931244 | 0.4015270373111646 | 0.6391537477176843 | T | T | T |

E

1.0000000000000000  
8.5086002349999994 0.0000000000000000 0.0000000000000000  
0.0000000000000000 10.8548107146999993 0.0000000000000000  
0.0000000000000000 0.0000000000000000 30.0000000000000000

Co H O

24 46 58

Selective dynamics

Direct

|                    |                    |                    |   |   |   |
|--------------------|--------------------|--------------------|---|---|---|
| 0.5870075998490364 | 0.5477212754644667 | 0.4002695932781212 | T | T | T |
| 0.2523182075927644 | 0.5502373378472646 | 0.3956049148013824 | T | T | T |
| 0.5805072572851265 | 0.0484053637051820 | 0.4007030769008710 | T | T | T |
| 0.2475154047531768 | 0.0479055339056059 | 0.3991716260719868 | T | T | T |
| 0.9142034849235025 | 0.0469487224219617 | 0.4000190694055440 | T | T | T |
| 0.9169015319952545 | 0.5476718604761519 | 0.3997220240235341 | T | T | T |
| 0.0833333129999971 | 0.1817300920000022 | 0.4673556090000019 | F | F | F |
| 0.0833333129999971 | 0.6817300319999973 | 0.4673556090000019 | F | F | F |
| 0.4166666870000029 | 0.1817300920000022 | 0.4673556090000019 | F | F | F |
| 0.4166666870000029 | 0.6817300319999973 | 0.4673556090000019 | F | F | F |
| 0.7500000000000000 | 0.1817300920000022 | 0.4673556090000019 | F | F | F |
| 0.7500000000000000 | 0.6817300319999973 | 0.4673556090000019 | F | F | F |
| 0.2500000000000000 | 0.3182699680000027 | 0.5326443909999981 | F | F | F |
| 0.2500000000000000 | 0.8182699079999978 | 0.5326443909999981 | F | F | F |
| 0.5833333129999971 | 0.3182699680000027 | 0.5326443909999981 | F | F | F |
| 0.5833333129999971 | 0.8182699079999978 | 0.5326443909999981 | F | F | F |
| 0.9166666870000029 | 0.3182699680000027 | 0.5326443909999981 | F | F | F |
| 0.9166666870000029 | 0.8182699079999978 | 0.5326443909999981 | F | F | F |
| 0.0830984680047453 | 0.4523281395238482 | 0.6002779759764658 | T | T | T |
| 0.0857965150764974 | 0.9530512775780385 | 0.5999809305944557 | T | T | T |
| 0.7524845952468232 | 0.9520944660943940 | 0.6008283739280135 | T | T | T |
| 0.4194927427148732 | 0.9515946362948179 | 0.5992969230991291 | T | T | T |
| 0.7476817924072353 | 0.4497626621527355 | 0.6043950851986175 | T | T | T |
| 0.4129924001509640 | 0.4522787245355334 | 0.5997304067218789 | T | T | T |
| 0.4482312755053699 | 0.5108916398634363 | 0.3346852520320752 | T | T | T |
| 0.7504975065251829 | 0.5463318870165803 | 0.3344840635109658 | T | T | T |
| 0.7161663419176135 | 0.3741323501555859 | 0.3696866653531482 | T | T | T |
| 0.7438270674972830 | 0.0376308586313789 | 0.3355314833888888 | T | T | T |
| 0.0560636032199545 | 0.5407054492585253 | 0.3289759843833283 | T | T | T |
| 0.9778406229970554 | 0.3670543476899975 | 0.3523745599057121 | T | T | T |
| 0.1405808239810273 | 0.8732233154973059 | 0.3646940131061799 | T | T | T |
| 0.4136094126295780 | 0.0418919608239693 | 0.3348696989571938 | T | T | T |
| 0.4631480538504129 | 0.8722781826660907 | 0.3664047119321082 | T | T | T |
| 0.0781466221567666 | 0.0417539502493851 | 0.3345858604311809 | T | T | T |
| 0.813755595405244  | 0.8690438316827175 | 0.3627742761858438 | T | T | T |
| 0.2503545842474222 | 0.2801982270053888 | 0.4057890464112976 | T | T | T |
| 0.2525575522212103 | 0.7954002758101610 | 0.4083857091820743 | T | T | T |
| 0.5818581136782691 | 0.3096433697778521 | 0.3984051194289636 | T | T | T |
| 0.5839426894602715 | 0.8017675877187032 | 0.4009345963559598 | T | T | T |
| 0.9157291371951420 | 0.2884933263444588 | 0.4043176789025172 | T | T | T |
| 0.9204095069363686 | 0.7901204215046232 | 0.4041781037304985 | T | T | T |
| 0.0833333129999971 | 0.4317300920000022 | 0.4673556090000019 | F | F | F |
| 0.0833333129999971 | 0.9317300920000022 | 0.4673556090000019 | F | F | F |
| 0.4166666870000029 | 0.4317300920000022 | 0.4673556090000019 | F | F | F |
| 0.4166666870000029 | 0.9317300920000022 | 0.4673556090000019 | F | F | F |
| 0.7500000000000000 | 0.4317300920000022 | 0.4673556090000019 | F | F | F |
| 0.7500000000000000 | 0.9317300920000022 | 0.4673556090000019 | F | F | F |
| 0.2500000000000000 | 0.0682699079999978 | 0.5326443909999981 | F | F | F |
| 0.2500000000000000 | 0.5682699079999978 | 0.5326443909999981 | F | F | F |
| 0.5833333129999971 | 0.0682699079999978 | 0.5326443909999981 | F | F | F |
| 0.5833333129999971 | 0.5682699079999978 | 0.5326443909999981 | F | F | F |
| 0.9166666870000029 | 0.0682699079999978 | 0.5326443909999981 | F | F | F |
| 0.9166666870000029 | 0.5682699079999978 | 0.5326443909999981 | F | F | F |
| 0.0795904930636313 | 0.2098795784953770 | 0.5958218962695013 | T | T | T |

|                    |                    |                    |   |   |   |
|--------------------|--------------------|--------------------|---|---|---|
| 0.0842708628048651 | 0.7115066736555412 | 0.5956823210974830 | T | T | T |
| 0.4160573105397285 | 0.1982324122812968 | 0.5990654036440405 | T | T | T |
| 0.4181418863217308 | 0.6903566302221481 | 0.6015948805710366 | T | T | T |
| 0.7474424477787895 | 0.2045997241898388 | 0.5916142908179255 | T | T | T |
| 0.7496454157525780 | 0.7198017729946115 | 0.5942109535887025 | T | T | T |
| 0.1862444404594757 | 0.1309561683172821 | 0.6372257238141561 | T | T | T |
| 0.9218533778432333 | 0.9582460497506148 | 0.6654141395688190 | T | T | T |
| 0.5368519461495872 | 0.1277218173339094 | 0.6335952880678919 | T | T | T |
| 0.5863905873704147 | 0.9581080391760308 | 0.6651303010428063 | T | T | T |
| 0.8594191760189729 | 0.1267766845026938 | 0.6353059868938200 | T | T | T |
| 0.0221593770029445 | 0.6329456523100025 | 0.6476254400942877 | T | T | T |
| 0.9439363967800456 | 0.4592945507414747 | 0.6710240156166715 | T | T | T |
| 0.2561729325027171 | 0.9623691413686210 | 0.6644685166111109 | T | T | T |
| 0.2838336580823864 | 0.6258676498444141 | 0.6303133346468518 | T | T | T |
| 0.2495024934748172 | 0.4536681129834199 | 0.6655159364890343 | T | T | T |
| 0.5517687244946229 | 0.4891083601365637 | 0.6653147479679247 | T | T | T |
| 0.4323311807436067 | 0.5800471187618454 | 0.3550253236710825 | T | T | T |
| 0.7516489659290706 | 0.5983842895117666 | 0.3610360796866744 | T | T | T |
| 0.5996967436088173 | 0.3829115247732263 | 0.3752923148342205 | T | T | T |
| 0.7473356407122311 | 0.0936855777444799 | 0.3610040845838571 | T | T | T |
| 0.0722580803424721 | 0.5886003781792081 | 0.3560403490941271 | T | T | T |
| 0.4146497581036838 | 0.0966892848837400 | 0.3607235558060496 | T | T | T |
| 0.2491662767678220 | 0.8892651612390515 | 0.3747104375009569 | T | T | T |
| 0.0803953514831170 | 0.0964243759153312 | 0.3604702672951522 | T | T | T |
| 0.5738554891455673 | 0.8824058825924751 | 0.3760693021653578 | T | T | T |
| 0.9061037871696939 | 0.3821723117210755 | 0.3770864771478449 | T | T | T |
| 0.9173444461419359 | 0.8839420050183782 | 0.3761327476599367 | T | T | T |
| 0.2496130670562110 | 0.2096914614641069 | 0.4258566938688850 | T | T | T |
| 0.2505008775967790 | 0.7153554106814838 | 0.4279493408557135 | T | T | T |
| 0.5821515583695066 | 0.2069610605513051 | 0.4269234295793616 | T | T | T |
| 0.5834370684612844 | 0.7079107491954374 | 0.4263259548994862 | T | T | T |
| 0.9167057950663825 | 0.2068421414255854 | 0.4265971578319638 | T | T | T |
| 0.9181646525983371 | 0.7075741695098333 | 0.4262385663529070 | T | T | T |
| 0.0826150289887234 | 0.0192840306344704 | 0.4415702560430424 | T | T | T |
| 0.0813504815431755 | 0.5185742536783317 | 0.4422011376838241 | T | T | T |
| 0.4133770571678602 | 0.0194531453475910 | 0.4417557143221164 | T | T | T |
| 0.4212340176366284 | 0.5179402234123178 | 0.4422440421684067 | T | T | T |
| 0.7485312454663439 | 0.0188741455856196 | 0.4419517712152749 | T | T | T |
| 0.7520071515767801 | 0.5204328826778140 | 0.4423066582299127 | T | T | T |
| 0.0833333129999971 | 0.3437488080000008 | 0.4914442899999969 | F | F | F |
| 0.0833333129999971 | 0.8437487779999984 | 0.4914442899999969 | F | F | F |
| 0.4166666870000029 | 0.3437488080000008 | 0.4914442899999969 | F | F | F |
| 0.4166666870000029 | 0.8437487779999984 | 0.4914442899999969 | F | F | F |
| 0.7500000000000000 | 0.3437488080000008 | 0.4914442899999969 | F | F | F |
| 0.7500000000000000 | 0.8437487779999984 | 0.4914442899999969 | F | F | F |
| 0.2500000000000000 | 0.1562512220000016 | 0.5085557100000031 | F | F | F |
| 0.2500000000000000 | 0.6562511919999992 | 0.5085557100000031 | F | F | F |
| 0.5833333129999971 | 0.1562512220000016 | 0.5085557100000031 | F | F | F |
| 0.5833333129999971 | 0.6562511919999992 | 0.5085557100000031 | F | F | F |
| 0.9166666870000029 | 0.1562512220000016 | 0.5085557100000031 | F | F | F |
| 0.9166666870000029 | 0.6562511919999992 | 0.5085557100000031 | F | F | F |
| 0.2479928484232199 | 0.4795671173221857 | 0.5576933417700872 | T | T | T |
| 0.2514687545336563 | 0.9811258544143804 | 0.5580482287847321 | T | T | T |
| 0.5787659823633718 | 0.4820597765876822 | 0.5577559578316006 | T | T | T |
| 0.5866229428321397 | 0.9805468546524090 | 0.5582442856778836 | T | T | T |
| 0.9186495184568245 | 0.4814257463216683 | 0.5577988623161758 | T | T | T |
| 0.9173849710112767 | 0.9807159693655297 | 0.5584297439569577 | T | T | T |
| 0.0818353474016628 | 0.2924258304901665 | 0.5737614336470928 | T | T | T |
| 0.0832942049336176 | 0.7931578585744147 | 0.5734028421680363 | T | T | T |
| 0.4165629315387159 | 0.2920892508045626 | 0.5736740451005138 | T | T | T |
| 0.4178484416304932 | 0.7930389394487024 | 0.5730765704206380 | T | T | T |
| 0.7494991224032211 | 0.2846445893185163 | 0.5720506591442864 | T | T | T |
| 0.7503869329437891 | 0.7903085385358930 | 0.5741433061311081 | T | T | T |

|                    |                    |                    |   |   |   |
|--------------------|--------------------|--------------------|---|---|---|
| 0.082655538580643  | 0.1160579949816218 | 0.6238672523400633 | T | T | T |
| 0.0938962128303056 | 0.6178276882789177 | 0.6229135228521552 | T | T | T |
| 0.4261445108544328 | 0.1175941174075247 | 0.6239306978346495 | T | T | T |
| 0.9196046485168832 | 0.9035756240846688 | 0.6395297327048474 | T | T | T |
| 0.7508337232321782 | 0.1107348387609487 | 0.6252895624990430 | T | T | T |
| 0.5853502418963163 | 0.9033107151162596 | 0.6392764441939502 | T | T | T |
| 0.9277419196575278 | 0.4113996218207990 | 0.6439596509058658 | T | T | T |
| 0.2526643592877618 | 0.9063144222555202 | 0.6389959154161428 | T | T | T |
| 0.4003032563911826 | 0.6170884752267739 | 0.6247076851657865 | T | T | T |
| 0.2483510340709294 | 0.4016157104882334 | 0.6389639203133258 | T | T | T |
| 0.5676688192563929 | 0.4199528812381547 | 0.6449746763289174 | T | T | T |

1

1.00000000000000  
8.5086002349999994 0.000000000000000 0.000000000000000  
0.000000000000000 10.8548107146999993 0.000000000000000  
0.000000000000000 0.000000000000000 30.000000000000000

Co H O

24 44 60

Selective dynamics

Direct

|                    |                    |                    |   |   |   |
|--------------------|--------------------|--------------------|---|---|---|
| 0.5801534956689551 | 0.5503281227063778 | 0.3999493874448730 | T | T | T |
| 0.2524824210095809 | 0.5491097825454402 | 0.3999587811790269 | T | T | T |
| 0.5818751744068683 | 0.0506478449782914 | 0.4004780169262522 | T | T | T |
| 0.2485125196461912 | 0.0501054676520764 | 0.4002148269485969 | T | T | T |
| 0.9159416543969833 | 0.0509866370883631 | 0.4007646621032195 | T | T | T |
| 0.9159952953208137 | 0.5521165161694895 | 0.3997266818731265 | T | T | T |
| 0.0833333129999971 | 0.1817300920000022 | 0.4673556090000019 | F | F | F |
| 0.0833333129999971 | 0.6817300319999973 | 0.4673556090000019 | F | F | F |
| 0.4166666870000029 | 0.1817300920000022 | 0.4673556090000019 | F | F | F |
| 0.4166666870000029 | 0.6817300319999973 | 0.4673556090000019 | F | F | F |
| 0.7500000000000000 | 0.1817300920000022 | 0.4673556090000019 | F | F | F |
| 0.7500000000000000 | 0.6817300319999973 | 0.4673556090000019 | F | F | F |
| 0.2500000000000000 | 0.3182699680000027 | 0.5326443909999981 | F | F | F |
| 0.2500000000000000 | 0.8182699079999978 | 0.5326443909999981 | F | F | F |
| 0.5833333129999971 | 0.3182699680000027 | 0.5326443909999981 | F | F | F |
| 0.5833333129999971 | 0.8182699079999978 | 0.5326443909999981 | F | F | F |
| 0.9166666870000029 | 0.3182699680000027 | 0.5326443909999981 | F | F | F |
| 0.9166666870000029 | 0.8182699079999978 | 0.5326443909999981 | F | F | F |
| 0.0840047046791863 | 0.4478834838305034 | 0.6002733181268735 | T | T | T |
| 0.0840583456030169 | 0.9490133629116371 | 0.5992353378967804 | T | T | T |
| 0.7514874803538089 | 0.9498945323479238 | 0.5997851730514030 | T | T | T |
| 0.4181248255931318 | 0.9493521550217087 | 0.5995219830737479 | T | T | T |
| 0.7475175789904192 | 0.4508902174545600 | 0.6000412188209731 | T | T | T |
| 0.4198465043310450 | 0.4496718772936292 | 0.6000506125551270 | T | T | T |
| 0.7450613698597007 | 0.5525627348003233 | 0.3346144338925792 | T | T | T |
| 0.7322570957221900 | 0.3848712141058943 | 0.3722620571115592 | T | T | T |
| 0.7459655700237966 | 0.0440482218388133 | 0.3354156033709065 | T | T | T |
| 0.0876140105666449 | 0.5490131307748033 | 0.3349187113752174 | T | T | T |
| 0.1164084454317559 | 0.3837732202085452 | 0.3713196945403373 | T | T | T |
| 0.1267638516742847 | 0.8761042469031040 | 0.3666635234016651 | T | T | T |
| 0.4134581969160058 | 0.0504692305640045 | 0.3339928650146899 | T | T | T |
| 0.4726354976777499 | 0.8735865096448511 | 0.3608790383570893 | T | T | T |
| 0.0806112363866838 | 0.0520998748209158 | 0.3344852278950687 | T | T | T |
| 0.8486135675154016 | 0.8668240432714359 | 0.3542468140802003 | T | T | T |
| 0.2499145460738624 | 0.2908212198173849 | 0.4053092353141607 | T | T | T |
| 0.2530190379981459 | 0.8124291458474618 | 0.3980737804553833 | T | T | T |
| 0.5880312659203377 | 0.3114241742900863 | 0.3998515964703877 | T | T | T |
| 0.5862543114991901 | 0.8118149034796270 | 0.3966125173471249 | T | T | T |
| 0.9174435770465775 | 0.3252861732580712 | 0.3959627560391061 | T | T | T |
| 0.9195512885075766 | 0.7997649684247560 | 0.4025840442154384 | T | T | T |
| 0.0833333129999971 | 0.4317300920000022 | 0.4673556090000019 | F | F | F |
| 0.0833333129999971 | 0.9317300920000022 | 0.4673556090000019 | F | F | F |

|                    |                    |                    |   |   |   |
|--------------------|--------------------|--------------------|---|---|---|
| 0.4166666870000029 | 0.4317300920000022 | 0.4673556090000019 | F | F | F |
| 0.4166666870000029 | 0.9317300920000022 | 0.4673556090000019 | F | F | F |
| 0.7500000000000000 | 0.4317300920000022 | 0.4673556090000019 | F | F | F |
| 0.7500000000000000 | 0.9317300920000022 | 0.4673556090000019 | F | F | F |
| 0.2500000000000000 | 0.0682699079999978 | 0.5326443909999981 | F | F | F |
| 0.2500000000000000 | 0.5682699079999978 | 0.5326443909999981 | F | F | F |
| 0.5833333129999971 | 0.0682699079999978 | 0.5326443909999981 | F | F | F |
| 0.5833333129999971 | 0.5682699079999978 | 0.5326443909999981 | F | F | F |
| 0.9166666870000029 | 0.0682699079999978 | 0.5326443909999981 | F | F | F |
| 0.9166666870000029 | 0.5682699079999978 | 0.5326443909999981 | F | F | F |
| 0.0804487114924235 | 0.2002350315752441 | 0.5974159557845616 | T | T | T |
| 0.0825564229534225 | 0.6747138267419288 | 0.6040372439609010 | T | T | T |
| 0.4137456885008097 | 0.1881850965203728 | 0.6033874826528751 | T | T | T |
| 0.4119687340796620 | 0.6885758257099137 | 0.6001484035296124 | T | T | T |
| 0.7469809620018539 | 0.1875708541525384 | 0.6019262195446167 | T | T | T |
| 0.7500854539261378 | 0.7091787801826152 | 0.5946907646858391 | T | T | T |
| 0.1513864324845982 | 0.1331759567285641 | 0.6457531859197998 | T | T | T |
| 0.9193887636133163 | 0.9479001251790842 | 0.6655147721049312 | T | T | T |
| 0.5273645023222497 | 0.1264134903551489 | 0.6391209616429107 | T | T | T |
| 0.5865418030839941 | 0.9495307694359955 | 0.6660071349853102 | T | T | T |
| 0.8732361483257153 | 0.1238957530968888 | 0.6333364765983280 | T | T | T |
| 0.8835915545682439 | 0.6162267797914549 | 0.6286803054596628 | T | T | T |
| 0.9123859894333551 | 0.4509868692251968 | 0.6650812886247827 | T | T | T |
| 0.2540344299762034 | 0.9559517781611868 | 0.6645843966290935 | T | T | T |
| 0.2677429042778101 | 0.6151287858941058 | 0.6277379428884480 | T | T | T |
| 0.2549386301402993 | 0.4474372651996769 | 0.6653855661074205 | T | T | T |
| 0.4185196410369157 | 0.5871795652035628 | 0.3645472528560212 | T | T | T |
| 0.7462769671780475 | 0.6034943250774958 | 0.3615640455152127 | T | T | T |
| 0.2314618189107464 | 0.3902758658082734 | 0.3792491888741936 | T | T | T |
| 0.6104068306494628 | 0.3889927402422202 | 0.3778166041542841 | T | T | T |
| 0.7487859830560196 | 0.0974323195823675 | 0.3616356424097328 | T | T | T |
| 0.0869880517089603 | 0.6011829616773573 | 0.3615679863773074 | T | T | T |
| 0.4148592443863621 | 0.0985659011884010 | 0.3615253483642961 | T | T | T |
| 0.2408215209026336 | 0.8853483756532348 | 0.3750786257358064 | T | T | T |
| 0.0827111264449181 | 0.1009487167535991 | 0.3618518146632936 | T | T | T |
| 0.5775247886287824 | 0.8851206352802949 | 0.3740232379870578 | T | T | T |
| 0.9117363536278129 | 0.3944256879930966 | 0.3731450051963328 | T | T | T |
| 0.9292494509515276 | 0.8835652558427158 | 0.3766126193513374 | T | T | T |
| 0.2508759916154948 | 0.2085696369848248 | 0.4265611537802396 | T | T | T |
| 0.2525356835009733 | 0.7061378618200027 | 0.4267116938089370 | T | T | T |
| 0.5824518948725984 | 0.2084906846396760 | 0.4267400366926174 | T | T | T |
| 0.5824450233113044 | 0.7063346229642953 | 0.4266559748576113 | T | T | T |
| 0.9165073853206810 | 0.2080803830737181 | 0.4272528203397437 | T | T | T |
| 0.9167478255740339 | 0.7112325668143892 | 0.4270357753123789 | T | T | T |
| 0.0833598197396751 | 0.0201847267985061 | 0.4421123335196677 | T | T | T |
| 0.0816674530842709 | 0.5207936908081230 | 0.4414665699873716 | T | T | T |
| 0.4151459971666208 | 0.0196639300046957 | 0.4419405543626339 | T | T | T |
| 0.4167689066360315 | 0.5186043703729184 | 0.4419514725062993 | T | T | T |
| 0.7487310106188064 | 0.0195217426597505 | 0.4420095346859185 | T | T | T |
| 0.7506231857429675 | 0.5208853693852364 | 0.4414374680469207 | T | T | T |
| 0.0833333129999971 | 0.3437488080000008 | 0.4914442899999969 | F | F | F |
| 0.0833333129999971 | 0.8437487779999984 | 0.4914442899999969 | F | F | F |
| 0.4166666870000029 | 0.3437488080000008 | 0.4914442899999969 | F | F | F |
| 0.4166666870000029 | 0.8437487779999984 | 0.4914442899999969 | F | F | F |
| 0.7500000000000000 | 0.3437488080000008 | 0.4914442899999969 | F | F | F |
| 0.7500000000000000 | 0.8437487779999984 | 0.4914442899999969 | F | F | F |
| 0.2500000000000000 | 0.1562512220000016 | 0.5085557100000031 | F | F | F |
| 0.2500000000000000 | 0.6562511919999992 | 0.5085557100000031 | F | F | F |
| 0.5833333129999971 | 0.1562512220000016 | 0.5085557100000031 | F | F | F |
| 0.5833333129999971 | 0.6562511919999992 | 0.5085557100000031 | F | F | F |
| 0.9166666870000029 | 0.1562512220000016 | 0.5085557100000031 | F | F | F |
| 0.9166666870000029 | 0.6562511919999992 | 0.5085557100000031 | F | F | F |
| 0.2493768142570323 | 0.4791146306147634 | 0.5585625319530796 | T | T | T |



|                    |                    |                    |   |   |   |
|--------------------|--------------------|--------------------|---|---|---|
| 0.2512689893811936 | 0.9804782573402495 | 0.5579904653140816 | T | T | T |
| 0.5832310933639684 | 0.4813956296270744 | 0.5580485274937006 | T | T | T |
| 0.5848540028333793 | 0.9803360699953044 | 0.5580594456373660 | T | T | T |
| 0.9183325469157291 | 0.4792063091918771 | 0.5585334300126283 | T | T | T |
| 0.9166401802603249 | 0.9798152732014939 | 0.5578876664803323 | T | T | T |
| 0.0832521744259589 | 0.2887674331856108 | 0.5729642246876211 | T | T | T |
| 0.0834926146793191 | 0.7919196169262819 | 0.5727471796602563 | T | T | T |
| 0.4175549766886956 | 0.2936653770357045 | 0.5733440251423887 | T | T | T |
| 0.4175481051274017 | 0.7915093153603241 | 0.5732599633073826 | T | T | T |
| 0.7474643164990266 | 0.2938621381799973 | 0.5732883061910632 | T | T | T |
| 0.7491240083845053 | 0.7914303630151751 | 0.5734388462197606 | T | T | T |
| 0.0707505490484724 | 0.1164347441572770 | 0.6233873806486626 | T | T | T |
| 0.0882636463721800 | 0.6055743120069034 | 0.6268549948036672 | T | T | T |
| 0.4224752113712104 | 0.1148793647197051 | 0.6259767620129422 | T | T | T |
| 0.9172888735550819 | 0.8990512832464009 | 0.6381481853366991 | T | T | T |
| 0.7591784790973664 | 0.1146516243467652 | 0.6249213742641935 | T | T | T |
| 0.5851407556136380 | 0.9014340988115990 | 0.6384746516357042 | T | T | T |
| 0.9130119482910396 | 0.3988170383226429 | 0.6384320136226926 | T | T | T |
| 0.2512140169439804 | 0.9025676804176325 | 0.6383643575902671 | T | T | T |
| 0.3895931693505372 | 0.6110072597577728 | 0.6221833958457157 | T | T | T |
| 0.7685381810892536 | 0.6097241341917268 | 0.6207508111258062 | T | T | T |
| 0.2537230328219526 | 0.3965056749225039 | 0.6384359544847873 | T | T | T |
| 0.5814803589630843 | 0.4128204347964372 | 0.6354527471439788 | T | T | T |

1'

|                    |                     |                     |
|--------------------|---------------------|---------------------|
| 1.0000000000000000 |                     |                     |
| 8.5086002349999994 | 0.0000000000000000  | 0.0000000000000000  |
| 0.0000000000000000 | 10.8548107146999993 | 0.0000000000000000  |
| 0.0000000000000000 | 0.0000000000000000  | 30.0000000000000000 |

Co H O

24 44 60

Selective dynamics

Direct

|                    |                    |                    |   |   |   |
|--------------------|--------------------|--------------------|---|---|---|
| 0.5836594244086486 | 0.5471629938457970 | 0.4006184348537364 | T | T | T |
| 0.2485571167953080 | 0.5517831533660752 | 0.3998787763268779 | T | T | T |
| 0.5856323741923163 | 0.0492694353343099 | 0.4007482261107888 | T | T | T |
| 0.2512796600224711 | 0.0493468295321563 | 0.4006439730278628 | T | T | T |
| 0.9185194407923963 | 0.0515713911936376 | 0.4011281938970885 | T | T | T |
| 0.9185259370277726 | 0.5527437786402237 | 0.4004405447207123 | T | T | T |
| 0.0833333129999971 | 0.1817300920000022 | 0.4673556090000019 | F | F | F |
| 0.0833333129999971 | 0.6817300319999973 | 0.4673556090000019 | F | F | F |
| 0.4166666870000029 | 0.1817300920000022 | 0.4673556090000019 | F | F | F |
| 0.4166666870000029 | 0.6817300319999973 | 0.4673556090000019 | F | F | F |
| 0.7500000000000000 | 0.1817300920000022 | 0.4673556090000019 | F | F | F |
| 0.7500000000000000 | 0.6817300319999973 | 0.4673556090000019 | F | F | F |
| 0.2500000000000000 | 0.3182699680000027 | 0.5326443909999981 | F | F | F |
| 0.2500000000000000 | 0.8182699079999978 | 0.5326443909999981 | F | F | F |
| 0.5833333129999971 | 0.3182699680000027 | 0.5326443909999981 | F | F | F |
| 0.5833333129999971 | 0.8182699079999978 | 0.5326443909999981 | F | F | F |
| 0.9166666870000029 | 0.3182699680000027 | 0.5326443909999981 | F | F | F |
| 0.9166666870000029 | 0.8182699079999978 | 0.5326443909999981 | F | F | F |
| 0.0814740629722273 | 0.4472562213597764 | 0.5995594552792879 | T | T | T |
| 0.0814805592076042 | 0.9484286088063631 | 0.5988718061029114 | T | T | T |
| 0.7487203399775283 | 0.9506531704678437 | 0.5993560269721440 | T | T | T |
| 0.4143676258076842 | 0.9507305646656901 | 0.5992517738892116 | T | T | T |
| 0.7514428832046922 | 0.4482168466339251 | 0.6001212236731226 | T | T | T |
| 0.4163405755913514 | 0.4528370061542020 | 0.5993815651462641 | T | T | T |
| 0.4167069499771228 | 0.5267690221319848 | 0.3395047169756774 | T | T | T |
| 0.7492190820295113 | 0.5299983958987947 | 0.3387620994157372 | T | T | T |
| 0.7527185888595435 | 0.0520507249441130 | 0.3349485701565078 | T | T | T |
| 0.0832188355041680 | 0.5579455217859582 | 0.3349539408236457 | T | T | T |
| 0.0668685924121909 | 0.3870222992626660 | 0.3711036293930449 | T | T | T |
| 0.0350309508460115 | 0.8748777709221880 | 0.3660857328972938 | T | T | T |

|                    |                    |                    |   |   |   |
|--------------------|--------------------|--------------------|---|---|---|
| 0.4224853359168111 | 0.0411803229733480 | 0.3353800544375422 | T | T | T |
| 0.3208792354195790 | 0.8686687892417855 | 0.3550701252846039 | T | T | T |
| 0.0861029506737521 | 0.0515850830613384 | 0.3353082560421119 | T | T | T |
| 0.7044567018337616 | 0.8746848852369001 | 0.3638229615332947 | T | T | T |
| 0.2629396917873181 | 0.3303996952968993 | 0.3918801989808654 | T | T | T |
| 0.2480399997300091 | 0.7959113014919451 | 0.4039240256091458 | T | T | T |
| 0.5786759502131545 | 0.3301616292904659 | 0.3976137749329121 | T | T | T |
| 0.5834216684368160 | 0.8102584240856666 | 0.3976031127445677 | T | T | T |
| 0.9138920266163819 | 0.3226646038434752 | 0.3946287450578517 | T | T | T |
| 0.9142752565934402 | 0.8104284250836699 | 0.3999637288426733 | T | T | T |
| 0.0833333129999971 | 0.4317300920000022 | 0.4673556090000019 | F | F | F |
| 0.0833333129999971 | 0.9317300920000022 | 0.4673556090000019 | F | F | F |
| 0.4166666870000029 | 0.4317300920000022 | 0.4673556090000019 | F | F | F |
| 0.4166666870000029 | 0.9317300920000022 | 0.4673556090000019 | F | F | F |
| 0.7500000000000000 | 0.4317300920000022 | 0.4673556090000019 | F | F | F |
| 0.7500000000000000 | 0.9317300920000022 | 0.4673556090000019 | F | F | F |
| 0.2500000000000000 | 0.0682699079999978 | 0.5326443909999981 | F | F | F |
| 0.2500000000000000 | 0.5682699079999978 | 0.5326443909999981 | F | F | F |
| 0.5833333129999971 | 0.0682699079999978 | 0.5326443909999981 | F | F | F |
| 0.5833333129999971 | 0.5682699079999978 | 0.5326443909999981 | F | F | F |
| 0.9166666870000029 | 0.0682699079999978 | 0.5326443909999981 | F | F | F |
| 0.9166666870000029 | 0.5682699079999978 | 0.5326443909999981 | F | F | F |
| 0.0857247434065607 | 0.1895715749163299 | 0.6000362711573265 | T | T | T |
| 0.0861079733836178 | 0.6773353961565247 | 0.6053712549421481 | T | T | T |
| 0.4165783315631844 | 0.1897415759143335 | 0.6023968872554325 | T | T | T |
| 0.4213240497868451 | 0.6698383707095406 | 0.6023862250670883 | T | T | T |
| 0.7519600002699911 | 0.2040886985080545 | 0.5960759743908541 | T | T | T |
| 0.7370603082126814 | 0.6696003047031002 | 0.6081198010191347 | T | T | T |
| 0.2955432981662383 | 0.1253151147630998 | 0.6361770384667050 | T | T | T |
| 0.9138970493262477 | 0.9484149169386618 | 0.6646917439578887 | T | T | T |
| 0.6791207645804213 | 0.1313312107582143 | 0.6449298747153953 | T | T | T |
| 0.5775146640831957 | 0.9588196770266521 | 0.6646199455624572 | T | T | T |
| 0.9649690491539882 | 0.1251222290778121 | 0.6339142671027059 | T | T | T |
| 0.9331314075878165 | 0.6129777007373409 | 0.6288963706069546 | T | T | T |
| 0.9167811644958319 | 0.4420544782140420 | 0.6650460591763542 | T | T | T |
| 0.2472814111404566 | 0.9479492750558868 | 0.6650514298434925 | T | T | T |
| 0.2507809179704888 | 0.4700016041012052 | 0.6612379005842628 | T | T | T |
| 0.5832930500228770 | 0.4732309778680149 | 0.6604952830243227 | T | T | T |
| 0.4184737052831479 | 0.5950726184890589 | 0.3610147634875771 | T | T | T |
| 0.7487820941278215 | 0.5956817017097450 | 0.3612471772430649 | T | T | T |
| 0.2317940604762131 | 0.3983376377370893 | 0.3715775209854763 | T | T | T |
| 0.5850793989980730 | 0.4005579521505699 | 0.3756713944349336 | T | T | T |
| 0.7511677058933809 | 0.1001148364855874 | 0.3625083907606899 | T | T | T |
| 0.0832513370141333 | 0.6077261535168124 | 0.3621391382065247 | T | T | T |
| 0.4189663459224738 | 0.0942153954631577 | 0.3616922381829298 | T | T | T |
| 0.2384214160403575 | 0.8845671911036829 | 0.3769728198944194 | T | T | T |
| 0.0854411576688630 | 0.1011227472547914 | 0.3625338029837220 | T | T | T |
| 0.5955522130875310 | 0.8850728763401722 | 0.3746693510443005 | T | T | T |
| 0.9397610826124267 | 0.3933438196548081 | 0.3734700216241904 | T | T | T |
| 0.9232968133930362 | 0.8852343910592034 | 0.3758143100540796 | T | T | T |
| 0.2560447790760095 | 0.2060523579776789 | 0.4278131211143081 | T | T | T |
| 0.2513936667156517 | 0.7110218724693734 | 0.4271816738816842 | T | T | T |
| 0.5791070026691291 | 0.2063559638431063 | 0.4275909856709614 | T | T | T |
| 0.5821096496757348 | 0.7075726516644848 | 0.4263236727263677 | T | T | T |
| 0.9156891797687023 | 0.2087713763928816 | 0.4273077355615025 | T | T | T |
| 0.9145374617226324 | 0.7103786060574803 | 0.4273698216193972 | T | T | T |
| 0.0847841324424841 | 0.0201856387741320 | 0.4423611834745287 | T | T | T |
| 0.0837175479998015 | 0.5212938316367581 | 0.4420231951970452 | T | T | T |
| 0.4182313227754582 | 0.0189171012592471 | 0.4424670422047589 | T | T | T |
| 0.4164732727607908 | 0.5191868236384055 | 0.4420682425346491 | T | T | T |
| 0.7512880971788648 | 0.0191519341138457 | 0.4424926276183273 | T | T | T |
| 0.7499623367740811 | 0.5198628263072813 | 0.4418915086804887 | T | T | T |
| 0.0833333129999971 | 0.3437488080000008 | 0.4914442899999969 | F | F | F |

|                    |                    |                    |       |
|--------------------|--------------------|--------------------|-------|
| 0.0833333129999971 | 0.8437487779999984 | 0.4914442899999969 | F F F |
| 0.4166666870000029 | 0.3437488080000008 | 0.4914442899999969 | F F F |
| 0.4166666870000029 | 0.8437487779999984 | 0.4914442899999969 | F F F |
| 0.7500000000000000 | 0.3437488080000008 | 0.4914442899999969 | F F F |
| 0.7500000000000000 | 0.8437487779999984 | 0.4914442899999969 | F F F |
| 0.2500000000000000 | 0.1562512220000016 | 0.5085557100000031 | F F F |
| 0.2500000000000000 | 0.6562511919999992 | 0.5085557100000031 | F F F |
| 0.5833333129999971 | 0.1562512220000016 | 0.5085557100000031 | F F F |
| 0.5833333129999971 | 0.6562511919999992 | 0.5085557100000031 | F F F |
| 0.9166666870000029 | 0.1562512220000016 | 0.5085557100000031 | F F F |
| 0.9166666870000029 | 0.6562511919999992 | 0.5085557100000031 | F F F |
| 0.2500376632259192 | 0.4801371736927194 | 0.5581084913195116 | T T T |
| 0.2487119028211349 | 0.9808480658861547 | 0.5575073723816731 | T T T |
| 0.5835267272392092 | 0.4808131763615949 | 0.5579317574653516 | T T T |
| 0.5817686772245421 | 0.9810828987407533 | 0.5575329577952410 | T T T |
| 0.9162824520001984 | 0.4787061683632419 | 0.5579768048029544 | T T T |
| 0.9152158675575155 | 0.9798143612258756 | 0.5576388165254712 | T T T |
| 0.0854625382773606 | 0.2896213939425194 | 0.5726301783806024 | T T T |
| 0.0843108202312977 | 0.7912286236071185 | 0.5726922644384974 | T T T |
| 0.4178903503242651 | 0.2924273483355153 | 0.5736763272736327 | T T T |
| 0.4208929973308708 | 0.7936440361568938 | 0.5724090143290386 | T T T |
| 0.7486063332843480 | 0.2889781275306267 | 0.5728183261183155 | T T T |
| 0.7439552209239905 | 0.7939476420223209 | 0.5721868788856992 | T T T |
| 0.0767031866069636 | 0.1147656089407967 | 0.6241856899459207 | T T T |
| 0.0602389173875735 | 0.6066561803451986 | 0.6265299783758091 | T T T |
| 0.4044477869124689 | 0.1149271236598137 | 0.6253306489557144 | T T T |
| 0.9145588423311374 | 0.8988772527452082 | 0.6374661970162784 | T T T |
| 0.7615785839596494 | 0.1154328088963172 | 0.6230271801055811 | T T T |
| 0.5810336540775264 | 0.9057846045368421 | 0.6383077618170562 | T T T |
| 0.9167486629858669 | 0.3922738464831875 | 0.6378608617934751 | T T T |
| 0.2488322941066194 | 0.8998851635144132 | 0.6374916092393103 | T T T |
| 0.4149206010019268 | 0.5994420478494298 | 0.6243286055650659 | T T T |
| 0.7682059395237870 | 0.6016623622629175 | 0.6284224790145237 | T T T |
| 0.2512179058721794 | 0.4043182982902551 | 0.6387528227569345 | T T T |
| 0.5815262947168518 | 0.4049273815109413 | 0.6389852365124230 | T T T |

1"

|                    |                     |                     |
|--------------------|---------------------|---------------------|
| 1.0000000000000000 |                     |                     |
| 8.5086002349999994 | 0.0000000000000000  | 0.0000000000000000  |
| 0.0000000000000000 | 10.8548107146999993 | 0.0000000000000000  |
| 0.0000000000000000 | 0.0000000000000000  | 30.0000000000000000 |

Co H O

24 44 60

Selective dynamics

Direct

|                    |                    |                    |       |
|--------------------|--------------------|--------------------|-------|
| 0.5817301808139155 | 0.5503230396579886 | 0.4000289281107650 | T T T |
| 0.2536459484737963 | 0.5520620456731553 | 0.3997099037661507 | T T T |
| 0.5846965135535256 | 0.0498969406952166 | 0.4005858130472944 | T T T |
| 0.2518779048701695 | 0.0506535564099459 | 0.4005525831045196 | T T T |
| 0.9183832344558761 | 0.0489531400439146 | 0.4001225803874373 | T T T |
| 0.9091594825428205 | 0.5527220273724047 | 0.3998183023058066 | T T T |
| 0.0833333129999971 | 0.1817300920000022 | 0.4673556090000019 | F F F |
| 0.0833333129999971 | 0.6817300319999973 | 0.4673556090000019 | F F F |
| 0.4166666870000029 | 0.1817300920000022 | 0.4673556090000019 | F F F |
| 0.4166666870000029 | 0.6817300319999973 | 0.4673556090000019 | F F F |
| 0.7500000000000000 | 0.1817300920000022 | 0.4673556090000019 | F F F |
| 0.7500000000000000 | 0.6817300319999973 | 0.4673556090000019 | F F F |
| 0.2500000000000000 | 0.3182699680000027 | 0.5326443909999981 | F F F |
| 0.2500000000000000 | 0.8182699079999978 | 0.5326443909999981 | F F F |
| 0.5833333129999971 | 0.3182699680000027 | 0.5326443909999981 | F F F |
| 0.5833333129999971 | 0.8182699079999978 | 0.5326443909999981 | F F F |
| 0.9166666870000029 | 0.3182699680000027 | 0.5326443909999981 | F F F |
| 0.9166666870000029 | 0.8182699079999978 | 0.5326443909999981 | F F F |

|                    |                    |                    |   |   |   |
|--------------------|--------------------|--------------------|---|---|---|
| 0.0908405174571794 | 0.4472779726275952 | 0.6001816976941936 | T | T | T |
| 0.0816167655441238 | 0.9510468599560855 | 0.5998774196125627 | T | T | T |
| 0.7481220951298306 | 0.9493464435900542 | 0.5994474168954803 | T | T | T |
| 0.4153034864464745 | 0.9501030593047832 | 0.5994141869527058 | T | T | T |
| 0.7463540515262037 | 0.4479379543268446 | 0.6002900962338564 | T | T | T |
| 0.4182698191860916 | 0.4496769603420114 | 0.5999710718892350 | T | T | T |
| 0.4759394544156290 | 0.3759459557712453 | 0.3607264885342368 | T | T | T |
| 0.8280441598064836 | 0.3754797302197386 | 0.3587338915757782 | T | T | T |
| 0.7535588043753377 | 0.0462507167693589 | 0.3344700717297865 | T | T | T |
| 0.0803578347344127 | 0.5524146883941250 | 0.3342799591048389 | T | T | T |
| 0.1230079695163735 | 0.3778594113075380 | 0.3688426106360550 | T | T | T |
| 0.0229763153130134 | 0.8712000345465031 | 0.3610862965604431 | T | T | T |
| 0.4197208896796094 | 0.0512631591448518 | 0.3344748875124320 | T | T | T |
| 0.3664640028533539 | 0.8747948950048569 | 0.3643059818128520 | T | T | T |
| 0.0880779325439384 | 0.0493543116231149 | 0.3341894933077722 | T | T | T |
| 0.6702921370804865 | 0.8687744511199943 | 0.3576799728010480 | T | T | T |
| 0.2489659159967783 | 0.3067181756547404 | 0.4012799871507346 | T | T | T |
| 0.2477118856815003 | 0.8104463554014429 | 0.3984104788218807 | T | T | T |
| 0.5820720561644286 | 0.3072308811306637 | 0.3991613016511243 | T | T | T |
| 0.5809520853031719 | 0.8015594366465368 | 0.4013930122052049 | T | T | T |
| 0.9167607030826892 | 0.2918587464061314 | 0.4045402050551341 | T | T | T |
| 0.9146855389494831 | 0.8083836679960298 | 0.3992397633412881 | T | T | T |
| 0.0833333129999971 | 0.4317300920000022 | 0.4673556090000019 | F | F | F |
| 0.0833333129999971 | 0.9317300920000022 | 0.4673556090000019 | F | F | F |
| 0.4166666870000029 | 0.4317300920000022 | 0.4673556090000019 | F | F | F |
| 0.4166666870000029 | 0.9317300920000022 | 0.4673556090000019 | F | F | F |
| 0.7500000000000000 | 0.4317300920000022 | 0.4673556090000019 | F | F | F |
| 0.7500000000000000 | 0.9317300920000022 | 0.4673556090000019 | F | F | F |
| 0.2500000000000000 | 0.0682699079999978 | 0.5326443909999981 | F | F | F |
| 0.2500000000000000 | 0.5682699079999978 | 0.5326443909999981 | F | F | F |
| 0.5833333129999971 | 0.0682699079999978 | 0.5326443909999981 | F | F | F |
| 0.5833333129999971 | 0.5682699079999978 | 0.5326443909999981 | F | F | F |
| 0.9166666870000029 | 0.0682699079999978 | 0.5326443909999981 | F | F | F |
| 0.9166666870000029 | 0.5682699079999978 | 0.5326443909999981 | F | F | F |
| 0.0853144610505170 | 0.1916163320039702 | 0.6007602366587119 | T | T | T |
| 0.0832392969173107 | 0.7081412535938685 | 0.5954597949448660 | T | T | T |
| 0.4190479146968281 | 0.1984405633534632 | 0.5986069877947950 | T | T | T |
| 0.4179279438355715 | 0.6927691188693363 | 0.6008386983488757 | T | T | T |
| 0.7522881143184997 | 0.1895536445985572 | 0.6015895211781194 | T | T | T |
| 0.7510340840032217 | 0.6932818243452596 | 0.5987200128492653 | T | T | T |
| 0.3297078629195205 | 0.1312255488800056 | 0.6423200271989519 | T | T | T |
| 0.9119220674560615 | 0.9506456883768851 | 0.6658105066922279 | T | T | T |
| 0.6335359971466462 | 0.1252051049951431 | 0.6356940181871479 | T | T | T |
| 0.5802791103203835 | 0.9487368408551481 | 0.6655251124875680 | T | T | T |
| 0.9770236846869865 | 0.1287999654534970 | 0.6389137034395570 | T | T | T |
| 0.8769920304836266 | 0.6221405886924620 | 0.6311573893639451 | T | T | T |
| 0.9196421652655802 | 0.4475853116058751 | 0.6657200408951613 | T | T | T |
| 0.2464411956246623 | 0.9537492832306412 | 0.6655299282702133 | T | T | T |
| 0.1719558401935164 | 0.6245202697802614 | 0.6412661084242218 | T | T | T |
| 0.5240605455843710 | 0.6240540442287547 | 0.6392735114657629 | T | T | T |
| 0.4115136310653822 | 0.5880005301326019 | 0.3640486737837512 | T | T | T |
| 0.7507899960775586 | 0.5882214397807448 | 0.3641881632618396 | T | T | T |
| 0.2363798584980664 | 0.3852229832939248 | 0.3773402334531359 | T | T | T |
| 0.5784385409728038 | 0.3836803411620668 | 0.3755160829366521 | T | T | T |
| 0.7516859071626770 | 0.0969284663079745 | 0.3613840794513618 | T | T | T |
| 0.0816051228295135 | 0.6021413442557209 | 0.3614787571472115 | T | T | T |
| 0.4183758130243859 | 0.1001860933279382 | 0.3618215821561273 | T | T | T |
| 0.2565543198983056 | 0.8847207449222155 | 0.3749978548027141 | T | T | T |
| 0.0850314536912059 | 0.0982950800060481 | 0.3615150723433909 | T | T | T |
| 0.5775091860649184 | 0.8826404800289133 | 0.3763514914492397 | T | T | T |
| 0.9211445584936947 | 0.3865400799926829 | 0.3775448516181100 | T | T | T |
| 0.9199842240647048 | 0.8838168766669872 | 0.3752900436516270 | T | T | T |
| 0.2504257169807140 | 0.2085996564677967 | 0.4268798081540129 | T | T | T |

|                    |                    |                    |   |   |   |
|--------------------|--------------------|--------------------|---|---|---|
| 0.2497815757723982 | 0.7078246146195181 | 0.4267738715652558 | T | T | T |
| 0.5842084653335671 | 0.2080808585167410 | 0.4268296264409846 | T | T | T |
| 0.5829893697319861 | 0.7086672058111870 | 0.4266920743276562 | T | T | T |
| 0.9167471490064824 | 0.2081267155354165 | 0.4264575797779115 | T | T | T |
| 0.9154306850516614 | 0.7088834654966394 | 0.4268970472867880 | T | T | T |
| 0.0844141326260303 | 0.0195835409725451 | 0.4418763650035169 | T | T | T |
| 0.0818108684968510 | 0.5200121448088137 | 0.4410667143365317 | T | T | T |
| 0.4177051736333882 | 0.0197863493359907 | 0.4420435451517115 | T | T | T |
| 0.4149156969744720 | 0.5198134477263030 | 0.4420545918417783 | T | T | T |
| 0.7516316851252420 | 0.0193158841030337 | 0.4418847726027463 | T | T | T |
| 0.7491145854509735 | 0.5199531400112036 | 0.4422008765572850 | T | T | T |
| 0.0833333129999971 | 0.3437488080000008 | 0.4914442899999969 | F | F | F |
| 0.0833333129999971 | 0.8437487779999984 | 0.4914442899999969 | F | F | F |
| 0.4166666870000029 | 0.3437488080000008 | 0.4914442899999969 | F | F | F |
| 0.4166666870000029 | 0.8437487779999984 | 0.4914442899999969 | F | F | F |
| 0.7500000000000000 | 0.3437488080000008 | 0.4914442899999969 | F | F | F |
| 0.7500000000000000 | 0.8437487779999984 | 0.4914442899999969 | F | F | F |
| 0.2500000000000000 | 0.1562512220000016 | 0.5085557100000031 | F | F | F |
| 0.2500000000000000 | 0.6562511919999992 | 0.5085557100000031 | F | F | F |
| 0.5833333129999971 | 0.1562512220000016 | 0.5085557100000031 | F | F | F |
| 0.5833333129999971 | 0.6562511919999992 | 0.5085557100000031 | F | F | F |
| 0.9166666870000029 | 0.1562512220000016 | 0.5085557100000031 | F | F | F |
| 0.9166666870000029 | 0.6562511919999992 | 0.5085557100000031 | F | F | F |
| 0.2508854145490265 | 0.4800468599887964 | 0.5577991234427151 | T | T | T |
| 0.2483683148747579 | 0.9806841158969661 | 0.5581152273972536 | T | T | T |
| 0.5850843030255279 | 0.4801865522736971 | 0.5579454081582216 | T | T | T |
| 0.5822948263666117 | 0.9802136506640093 | 0.5579564548482886 | T | T | T |
| 0.9181891315031490 | 0.4799878551911862 | 0.5589332856634682 | T | T | T |
| 0.9155858673739697 | 0.9804164590274549 | 0.5581236349964831 | T | T | T |
| 0.0845693149483384 | 0.2911165345033606 | 0.5731029527132120 | T | T | T |
| 0.0832528509935177 | 0.7918732844645835 | 0.5735424202220885 | T | T | T |
| 0.4170106302680138 | 0.2913327941888130 | 0.5733079256723437 | T | T | T |
| 0.4157915346664330 | 0.7919191414832590 | 0.5731703735590153 | T | T | T |
| 0.7502184242276017 | 0.2921753853804819 | 0.5732261284347442 | T | T | T |
| 0.7495742830192931 | 0.7914003435322032 | 0.5731201918459872 | T | T | T |
| 0.0800157759352951 | 0.1161831233330058 | 0.6247099563483730 | T | T | T |
| 0.0788554415063053 | 0.6134599200073170 | 0.6224551483818901 | T | T | T |
| 0.4224908139350816 | 0.1173595199710867 | 0.6236485085507603 | T | T | T |
| 0.9149685463087942 | 0.9017049199939520 | 0.6384849276566091 | T | T | T |
| 0.7434456801016945 | 0.1152792550777846 | 0.6250021451972859 | T | T | T |
| 0.5816241869756140 | 0.8998139066720617 | 0.6381784178438726 | T | T | T |
| 0.9183948771704864 | 0.3978586557442792 | 0.6385212428527886 | T | T | T |
| 0.2483140928373231 | 0.9030715336920256 | 0.6386159205486381 | T | T | T |
| 0.4215614590271963 | 0.6163196588379332 | 0.6244839170633479 | T | T | T |
| 0.7636201415019407 | 0.6147770167060750 | 0.6226597665468642 | T | T | T |
| 0.2492100039224414 | 0.4117785602192550 | 0.6358118367381602 | T | T | T |
| 0.5884863689346179 | 0.4119994698673981 | 0.6359513262162487 | T | T | T |

2

|                    |                     |                     |  |  |  |
|--------------------|---------------------|---------------------|--|--|--|
| 1.0000000000000000 |                     |                     |  |  |  |
| 8.5086002349999994 | 0.0000000000000000  | 0.0000000000000000  |  |  |  |
| 0.0000000000000000 | 10.8548107146999993 | 0.0000000000000000  |  |  |  |
| 0.0000000000000000 | 0.0000000000000000  | 30.0000000000000000 |  |  |  |

Co H O

24 46 62

Selective dynamics

Direct

|                    |                    |                    |   |   |   |
|--------------------|--------------------|--------------------|---|---|---|
| 0.5821001492430715 | 0.5515647728527839 | 0.3999301443462611 | T | T | T |
| 0.2580243009724292 | 0.5532306828452401 | 0.3994609627718794 | T | T | T |
| 0.5809265983745873 | 0.0488440734050981 | 0.4008014751768574 | T | T | T |
| 0.2470973322565397 | 0.0462365438575669 | 0.4000721937710137 | T | T | T |
| 0.9141496080624507 | 0.0477907615913443 | 0.4002114854227563 | T | T | T |
| 0.9189769224864559 | 0.5502549194079706 | 0.3999148727472051 | T | T | T |

|                    |                    |                    |       |
|--------------------|--------------------|--------------------|-------|
| 0.0833333129999971 | 0.1817300920000022 | 0.4673556090000019 | F F F |
| 0.0833333129999971 | 0.6817300319999973 | 0.4673556090000019 | F F F |
| 0.4166666870000029 | 0.1817300920000022 | 0.4673556090000019 | F F F |
| 0.4166666870000029 | 0.6817300319999973 | 0.4673556090000019 | F F F |
| 0.7500000000000000 | 0.1817300920000022 | 0.4673556090000019 | F F F |
| 0.7500000000000000 | 0.6817300319999973 | 0.4673556090000019 | F F F |
| 0.2500000000000000 | 0.3182699680000027 | 0.5326443909999981 | F F F |
| 0.2500000000000000 | 0.8182699079999978 | 0.5326443909999981 | F F F |
| 0.5833333129999971 | 0.3182699680000027 | 0.5326443909999981 | F F F |
| 0.5833333129999971 | 0.8182699079999978 | 0.5326443909999981 | F F F |
| 0.9166666870000029 | 0.3182699680000027 | 0.5326443909999981 | F F F |
| 0.9166666870000029 | 0.8182699079999978 | 0.5326443909999981 | F F F |
| 0.0810230775135370 | 0.4497450805920293 | 0.6000851272527949 | T T T |
| 0.0858503919375492 | 0.9522092384086558 | 0.5997885145772437 | T T T |
| 0.7529026677434605 | 0.9537634561424331 | 0.5999278062289863 | T T T |
| 0.4190734016254128 | 0.9511559265949020 | 0.5991985248231426 | T T T |
| 0.7419756990275708 | 0.4467693171547600 | 0.6005390372281207 | T T T |
| 0.4178998507569282 | 0.4484352271472161 | 0.6000698556537389 | T T T |
| 0.3120005765044797 | 0.3849955702306967 | 0.3183484842481512 | T T T |
| 0.7504137360311612 | 0.5497762572294334 | 0.3345677286688725 | T T T |
| 0.7152727141658936 | 0.3784955601419459 | 0.3697027085407733 | T T T |
| 0.7440213889224612 | 0.0406897621285206 | 0.3353636815545908 | T T T |
| 0.0991851511608621 | 0.5393200687453332 | 0.3363813884933837 | T T T |
| 0.9873231174750305 | 0.3685492152506838 | 0.3545730487520349 | T T T |
| 0.1296867084355416 | 0.8716717275351589 | 0.3658645193851932 | T T T |
| 0.4130039317048491 | 0.0419424461444134 | 0.3347039320068333 | T T T |
| 0.4772626018598778 | 0.8695356844108501 | 0.3619518555038491 | T T T |
| 0.0783850035514326 | 0.0438915131538752 | 0.3345025736263155 | T T T |
| 0.8191434093581336 | 0.8686884322396455 | 0.3611940186399316 | T T T |
| 0.2481557230406307 | 0.2807082554446682 | 0.4047286185576776 | T T T |
| 0.2505557288318565 | 0.8055344312454727 | 0.4004556070701996 | T T T |
| 0.5767392542560885 | 0.3157303476129562 | 0.3964336714017844 | T T T |
| 0.5852787262472587 | 0.8041731230864340 | 0.4005607823398941 | T T T |
| 0.9154864052462144 | 0.2916893166876912 | 0.4042541296840312 | T T T |
| 0.9191448062377684 | 0.7933298584576060 | 0.4041075124161595 | T T T |
| 0.0833333129999971 | 0.4317300920000022 | 0.4673556090000019 | F F F |
| 0.0833333129999971 | 0.9317300920000022 | 0.4673556090000019 | F F F |
| 0.4166666870000029 | 0.4317300920000022 | 0.4673556090000019 | F F F |
| 0.4166666870000029 | 0.9317300920000022 | 0.4673556090000019 | F F F |
| 0.7500000000000000 | 0.4317300920000022 | 0.4673556090000019 | F F F |
| 0.7500000000000000 | 0.9317300920000022 | 0.4673556090000019 | F F F |
| 0.2500000000000000 | 0.0682699079999978 | 0.5326443909999981 | F F F |
| 0.2500000000000000 | 0.5682699079999978 | 0.5326443909999981 | F F F |
| 0.5833333129999971 | 0.0682699079999978 | 0.5326443909999981 | F F F |
| 0.5833333129999971 | 0.5682699079999978 | 0.5326443909999981 | F F F |
| 0.9166666870000029 | 0.0682699079999978 | 0.5326443909999981 | F F F |
| 0.9166666870000029 | 0.5682699079999978 | 0.5326443909999981 | F F F |
| 0.0808551937622318 | 0.2066701415423939 | 0.5958924875838404 | T T T |
| 0.0845135947537854 | 0.7083106833123090 | 0.5957458703159688 | T T T |
| 0.4147212737527413 | 0.1958268769135659 | 0.5994392176601060 | T T T |
| 0.4232607457439116 | 0.6842696523870438 | 0.6035663285982156 | T T T |
| 0.7494442711681435 | 0.1944655687545275 | 0.5995443929298008 | T T T |
| 0.7518442769593691 | 0.7192917445553315 | 0.5952713814423223 | T T T |
| 0.1808565906418665 | 0.1313115677603542 | 0.6388059813600684 | T T T |
| 0.9216149964485675 | 0.9561084868461247 | 0.6654974263736846 | T T T |
| 0.5227373981401223 | 0.1304643155891501 | 0.6380481444961510 | T T T |
| 0.5869960682951511 | 0.9580575538555866 | 0.6652960679931669 | T T T |
| 0.8703132915644586 | 0.1283282724648412 | 0.6341354806148066 | T T T |
| 0.0126768825249695 | 0.6314507847493160 | 0.6454269512479652 | T T T |
| 0.9008148488391379 | 0.4606799312546668 | 0.6636186115066162 | T T T |
| 0.2559786110775389 | 0.9593102378714794 | 0.6646363184454093 | T T T |
| 0.2847272858341064 | 0.6215044398580539 | 0.6302972914592265 | T T T |
| 0.2495862639688387 | 0.4502237427705666 | 0.6654322713311274 | T T T |

|                    |                    |                    |   |   |   |
|--------------------|--------------------|--------------------|---|---|---|
| 0.6879994234955205 | 0.6150044297693034 | 0.6816515157518488 | T | T | T |
| 0.2100618095404551 | 0.3787000224713288 | 0.3336312593208289 | T | T | T |
| 0.4144597490754613 | 0.5935500962434226 | 0.3642674531539242 | T | T | T |
| 0.7506387255207009 | 0.6015073295138109 | 0.3612204260305461 | T | T | T |
| 0.2551316209318130 | 0.3918965379410876 | 0.3797739479495558 | T | T | T |
| 0.5982912158543149 | 0.3873430300882216 | 0.3741108272877799 | T | T | T |
| 0.7475792882182684 | 0.0950959964242753 | 0.3613002757138328 | T | T | T |
| 0.0884600504554203 | 0.5988181559253467 | 0.3608893871206421 | T | T | T |
| 0.4135768281085321 | 0.0938162248126056 | 0.3613151035149921 | T | T | T |
| 0.2406169739627545 | 0.8821666339363924 | 0.3757544504209632 | T | T | T |
| 0.0808618680994481 | 0.0952823455143743 | 0.3612393646211945 | T | T | T |
| 0.5805949304576954 | 0.8822711999536438 | 0.3758114546255713 | T | T | T |
| 0.9068547578066191 | 0.3851368918530006 | 0.3770385129212854 | T | T | T |
| 0.9190658544756859 | 0.8836989049103977 | 0.3766230612417690 | T | T | T |
| 0.2493899149040857 | 0.2055093497623463 | 0.4262497519527205 | T | T | T |
| 0.2506885095030900 | 0.7098980107283411 | 0.4271631225352648 | T | T | T |
| 0.5817272143247352 | 0.2073200626549163 | 0.4268579180203698 | T | T | T |
| 0.5836701307551823 | 0.7092734096410642 | 0.4269798068644769 | T | T | T |
| 0.9166484373622054 | 0.2082525558110084 | 0.4264918460037643 | T | T | T |
| 0.9177709438408240 | 0.7090531751007308 | 0.4266710492916947 | T | T | T |
| 0.0815473775367762 | 0.0193303544997542 | 0.4419983057858385 | T | T | T |
| 0.0851908414888390 | 0.5203305897982281 | 0.4416477208806564 | T | T | T |
| 0.4140949956414473 | 0.0189119350193762 | 0.4420390039451749 | T | T | T |
| 0.4185167490269188 | 0.5197986726388187 | 0.4421666194783128 | T | T | T |
| 0.7486196113026403 | 0.0194458907672744 | 0.4420834184013301 | T | T | T |
| 0.7523756841307817 | 0.5202158034910591 | 0.4416628536915221 | T | T | T |
| 0.0833333129999971 | 0.3437488080000008 | 0.4914442899999969 | F | F | F |
| 0.0833333129999971 | 0.8437487779999984 | 0.4914442899999969 | F | F | F |
| 0.4166666870000029 | 0.3437488080000008 | 0.4914442899999969 | F | F | F |
| 0.4166666870000029 | 0.8437487779999984 | 0.4914442899999969 | F | F | F |
| 0.7500000000000000 | 0.3437488080000008 | 0.4914442899999969 | F | F | F |
| 0.7500000000000000 | 0.8437487779999984 | 0.4914442899999969 | F | F | F |
| 0.2500000000000000 | 0.1562512220000016 | 0.5085557100000031 | F | F | F |
| 0.2500000000000000 | 0.6562511919999992 | 0.5085557100000031 | F | F | F |
| 0.5833333129999971 | 0.1562512220000016 | 0.5085557100000031 | F | F | F |
| 0.5833333129999971 | 0.6562511919999992 | 0.5085557100000031 | F | F | F |
| 0.9166666870000029 | 0.1562512220000016 | 0.5085557100000031 | F | F | F |
| 0.9166666870000029 | 0.6562511919999992 | 0.5085557100000031 | F | F | F |
| 0.2476243158692184 | 0.4797841965089409 | 0.5583371463084780 | T | T | T |
| 0.2513803886973597 | 0.9805541092327256 | 0.5579165815986696 | T | T | T |
| 0.5814832509730812 | 0.4802013273611814 | 0.5578333805216873 | T | T | T |
| 0.5859050043585525 | 0.9810880649806238 | 0.5579609960548251 | T | T | T |
| 0.9148091585111611 | 0.4796694102017720 | 0.5583522791193436 | T | T | T |
| 0.9184526224632238 | 0.9806696455002457 | 0.5580016942141616 | T | T | T |
| 0.0822290561591759 | 0.2909468248992691 | 0.5733289507083051 | T | T | T |
| 0.0833515626377947 | 0.7917474441889916 | 0.5735081539962354 | T | T | T |
| 0.4163298692448179 | 0.2907265903589358 | 0.5730201931355160 | T | T | T |
| 0.4182727856752649 | 0.7926799373450839 | 0.5731420819796300 | T | T | T |
| 0.7493114904969099 | 0.2901019892716588 | 0.5728368774647351 | T | T | T |
| 0.7506100850959141 | 0.7944906502376539 | 0.5737502480472793 | T | T | T |
| 0.0809341455243140 | 0.1163010950896025 | 0.6233769387582381 | T | T | T |
| 0.0931452421933881 | 0.6148631081469993 | 0.6229614870787146 | T | T | T |
| 0.4194050695423048 | 0.1177288000463562 | 0.6241885453744287 | T | T | T |
| 0.9191381319005519 | 0.9047176544856258 | 0.6387606353788055 | T | T | T |
| 0.7593830260372455 | 0.1178333660636077 | 0.6242455495790369 | T | T | T |
| 0.5864231718914678 | 0.9061837751873946 | 0.6386848964850079 | T | T | T |
| 0.9115399495445796 | 0.4011818440746535 | 0.6391106128793578 | T | T | T |
| 0.2524207117817316 | 0.9049040035757246 | 0.6386997242861673 | T | T | T |
| 0.4017087841456853 | 0.6126569699117784 | 0.6258891727122202 | T | T | T |
| 0.7448683790681869 | 0.6081034620589124 | 0.6202260520504442 | T | T | T |
| 0.2493612744792991 | 0.3984926704861890 | 0.6387795739694538 | T | T | T |
| 0.5855402509245385 | 0.4064499037565774 | 0.6357325468460758 | T | T | T |
| 0.7899381904595449 | 0.6212999775286713 | 0.6663687406791711 | T | T | T |

2'

1.0000000000000000  
8.5086002349999994 0.0000000000000000 0.0000000000000000  
0.0000000000000000 10.8548107146999993 0.0000000000000000  
0.0000000000000000 0.0000000000000000 30.0000000000000000

Co H O

24 46 62

Selective dynamics

Direct

|                    |                    |                    |   |   |   |
|--------------------|--------------------|--------------------|---|---|---|
| 0.2485125906754912 | 0.0476130528365507 | 0.4000056335010070 | T | T | T |
| 0.2498233069684604 | 0.5532356988868905 | 0.3996793564279762 | T | T | T |
| 0.5816241432229399 | 0.0508495251037123 | 0.4008553793826573 | T | T | T |
| 0.5832058045086496 | 0.5477738643556314 | 0.4006944396008482 | T | T | T |
| 0.9146937376926539 | 0.0497486756530494 | 0.4007267392242392 | T | T | T |
| 0.9178422126635116 | 0.5510948589794168 | 0.4006086343488786 | T | T | T |
| 0.0833333129999971 | 0.1817300920000022 | 0.4673556090000019 | F | F | F |
| 0.0833333129999971 | 0.6817300319999973 | 0.4673556090000019 | F | F | F |
| 0.4166666870000029 | 0.1817300920000022 | 0.4673556090000019 | F | F | F |
| 0.4166666870000029 | 0.6817300319999973 | 0.4673556090000019 | F | F | F |
| 0.7500000000000000 | 0.1817300920000022 | 0.4673556090000019 | F | F | F |
| 0.7500000000000000 | 0.6817300319999973 | 0.4673556090000019 | F | F | F |
| 0.2500000000000000 | 0.3182699680000027 | 0.5326443909999981 | F | F | F |
| 0.2500000000000000 | 0.8182699079999978 | 0.5326443909999981 | F | F | F |
| 0.5833333129999971 | 0.3182699680000027 | 0.5326443909999981 | F | F | F |
| 0.5833333129999971 | 0.8182699079999978 | 0.5326443909999981 | F | F | F |
| 0.9166666870000029 | 0.3182699680000027 | 0.5326443909999981 | F | F | F |
| 0.9166666870000029 | 0.8182699079999978 | 0.5326443909999981 | F | F | F |
| 0.0821577873364878 | 0.4489051410205828 | 0.5993913656511221 | T | T | T |
| 0.0853062623073464 | 0.9502513243469503 | 0.5992732607757608 | T | T | T |
| 0.4167941954913504 | 0.4522261356443690 | 0.5993055603991526 | T | T | T |
| 0.4183758567770605 | 0.9491504748962872 | 0.5991446206173414 | T | T | T |
| 0.7501766930315396 | 0.4467643011131095 | 0.6003206435720233 | T | T | T |
| 0.7514874093245084 | 0.9523869471634495 | 0.5999943664989934 | T | T | T |
| 0.4379523308540743 | 0.3682102457489035 | 0.3488366702440910 | T | T | T |
| 0.4104612885307230 | 0.5386934810884991 | 0.3373704621542307 | T | T | T |
| 0.7470308303588443 | 0.5294167410174412 | 0.3386721956912420 | T | T | T |
| 0.7450991376422612 | 0.0454108818103428 | 0.3351845888332100 | T | T | T |
| 0.0831929347919958 | 0.5539067092656892 | 0.3346431390139919 | T | T | T |
| 0.0449321746005654 | 0.3791428619501366 | 0.3687220893522299 | T | T | T |
| 0.1573508022081525 | 0.8687248211952809 | 0.3598658554735502 | T | T | T |
| 0.4153855192685545 | 0.0485973978339405 | 0.3345371484965787 | T | T | T |
| 0.4636200307436015 | 0.8747263804368824 | 0.3649254287736123 | T | T | T |
| 0.0777666843764458 | 0.0433703630157737 | 0.3348882132702179 | T | T | T |
| 0.8138734155922943 | 0.8706685515532406 | 0.3602213260696243 | T | T | T |
| 0.2521133478392371 | 0.2830600313779740 | 0.4045549576521294 | T | T | T |
| 0.2525821381876170 | 0.7976937572315955 | 0.4036859556119172 | T | T | T |
| 0.5889993323915987 | 0.3241021522782927 | 0.3992230336118990 | T | T | T |
| 0.5854603797868524 | 0.8108655931957288 | 0.3977260266228622 | T | T | T |
| 0.9102035104275809 | 0.3142331333294276 | 0.3972008460777189 | T | T | T |
| 0.9181021769300559 | 0.8073032635892037 | 0.3994858757749692 | T | T | T |
| 0.0833333129999971 | 0.4317300920000022 | 0.4673556090000019 | F | F | F |
| 0.0833333129999971 | 0.9317300920000022 | 0.4673556090000019 | F | F | F |
| 0.4166666870000029 | 0.4317300920000022 | 0.4673556090000019 | F | F | F |
| 0.4166666870000029 | 0.9317300920000022 | 0.4673556090000019 | F | F | F |
| 0.7500000000000000 | 0.4317300920000022 | 0.4673556090000019 | F | F | F |
| 0.7500000000000000 | 0.9317300920000022 | 0.4673556090000019 | F | F | F |
| 0.2500000000000000 | 0.0682699079999978 | 0.5326443909999981 | F | F | F |
| 0.2500000000000000 | 0.5682699079999978 | 0.5326443909999981 | F | F | F |
| 0.5833333129999971 | 0.0682699079999978 | 0.5326443909999981 | F | F | F |
| 0.5833333129999971 | 0.5682699079999978 | 0.5326443909999981 | F | F | F |
| 0.9166666870000029 | 0.0682699079999978 | 0.5326443909999981 | F | F | F |
| 0.9166666870000029 | 0.5682699079999978 | 0.5326443909999981 | F | F | F |



|                    |                    |                    |   |   |   |
|--------------------|--------------------|--------------------|---|---|---|
| 0.0818978230699439 | 0.1926967364107958 | 0.6005141242250308 | T | T | T |
| 0.0897964895724192 | 0.6857668666705727 | 0.6027991539222810 | T | T | T |
| 0.4145396202131478 | 0.1891344068042711 | 0.6022739733771382 | T | T | T |
| 0.4110006676084018 | 0.6758978477217066 | 0.6007769663881013 | T | T | T |
| 0.7474178618123820 | 0.2023062427684045 | 0.5963140443880818 | T | T | T |
| 0.7478866521607626 | 0.7169399686220255 | 0.5954450423478713 | T | T | T |
| 0.1861265844077052 | 0.1293314484467585 | 0.6397786739303754 | T | T | T |
| 0.9222333156235544 | 0.9566296369842262 | 0.6651117867297819 | T | T | T |
| 0.5363799692563987 | 0.1252736195631179 | 0.6350745712263880 | T | T | T |
| 0.5846144807314456 | 0.9514026021660599 | 0.6654628515034198 | T | T | T |
| 0.8426491977918485 | 0.1312751788047191 | 0.6401341445264495 | T | T | T |
| 0.9550678253994347 | 0.6208571380498629 | 0.6312779106477704 | T | T | T |
| 0.9168070652080043 | 0.4460932907343104 | 0.6653568609860088 | T | T | T |
| 0.2549008623577392 | 0.9545891181896565 | 0.6648154111667905 | T | T | T |
| 0.2529691696411555 | 0.4705832589825584 | 0.6613278043087567 | T | T | T |
| 0.5895387114692769 | 0.4613065189115018 | 0.6626295378457697 | T | T | T |
| 0.5620476691459247 | 0.6317897542510963 | 0.6511633297559083 | T | T | T |
| 0.3263610679617701 | 0.3749109607907639 | 0.3347212031128826 | T | T | T |
| 0.4185449520447138 | 0.6005953190755461 | 0.3614297875936054 | T | T | T |
| 0.7486878277010403 | 0.5946602697253028 | 0.3612993612100602 | T | T | T |
| 0.2357559350164741 | 0.3920962184586914 | 0.3754041360269239 | T | T | T |
| 0.5803763877309766 | 0.3962627134455646 | 0.3767459191125833 | T | T | T |
| 0.7481565818334246 | 0.0976453621650203 | 0.3616885794455740 | T | T | T |
| 0.0828119862703723 | 0.6042803408934442 | 0.3616658548256336 | T | T | T |
| 0.4151132214312963 | 0.0982055086131141 | 0.3617106557979284 | T | T | T |
| 0.2542815157867707 | 0.8834850832577997 | 0.3766922859224552 | T | T | T |
| 0.0818015115662036 | 0.0957910876707114 | 0.3613340241078983 | T | T | T |
| 0.5745308005846377 | 0.8848186377827945 | 0.3746902057801403 | T | T | T |
| 0.9290135389574469 | 0.3878188391932392 | 0.3748252233757487 | T | T | T |
| 0.9145820249210362 | 0.8834048843988027 | 0.3754062208307315 | T | T | T |
| 0.2503001596102650 | 0.2078958906184149 | 0.4260917430163147 | T | T | T |
| 0.2508513511019332 | 0.7110058188125832 | 0.4271224196893902 | T | T | T |
| 0.5833768527351786 | 0.2084592609296300 | 0.4270886737502700 | T | T | T |
| 0.5849598763026214 | 0.7071062073056653 | 0.4262205183903867 | T | T | T |
| 0.9158381035530213 | 0.2079784670949324 | 0.4268152800512497 | T | T | T |
| 0.9163291126636274 | 0.7090104214620645 | 0.4269335327676822 | T | T | T |
| 0.0826833644961439 | 0.0194153359944625 | 0.4420340284037756 | T | T | T |
| 0.0844066130524015 | 0.5201067596225938 | 0.4416783505566546 | T | T | T |
| 0.4149387332278279 | 0.0197077536551863 | 0.4421593112848893 | T | T | T |
| 0.4168770653558846 | 0.5200908559275840 | 0.4415770161300653 | T | T | T |
| 0.7486349579115915 | 0.0194272467910465 | 0.4422033661630998 | T | T | T |
| 0.7498259121594995 | 0.5191396546933602 | 0.4418447061151096 | T | T | T |
| 0.0833333129999971 | 0.3437488080000008 | 0.4914442899999969 | F | F | F |
| 0.0833333129999971 | 0.8437487779999984 | 0.4914442899999969 | F | F | F |
| 0.4166666870000029 | 0.3437488080000008 | 0.4914442899999969 | F | F | F |
| 0.4166666870000029 | 0.8437487779999984 | 0.4914442899999969 | F | F | F |
| 0.7500000000000000 | 0.3437488080000008 | 0.4914442899999969 | F | F | F |
| 0.7500000000000000 | 0.8437487779999984 | 0.4914442899999969 | F | F | F |
| 0.2500000000000000 | 0.1562512220000016 | 0.5085557100000031 | F | F | F |
| 0.2500000000000000 | 0.6562511919999992 | 0.5085557100000031 | F | F | F |
| 0.5833333129999971 | 0.1562512220000016 | 0.5085557100000031 | F | F | F |
| 0.5833333129999971 | 0.6562511919999992 | 0.5085557100000031 | F | F | F |
| 0.9166666870000029 | 0.1562512220000016 | 0.5085557100000031 | F | F | F |
| 0.9166666870000029 | 0.6562511919999992 | 0.5085557100000031 | F | F | F |
| 0.2501740878405010 | 0.4808603453066402 | 0.5581552938848899 | T | T | T |
| 0.2513650420884077 | 0.9805727532089543 | 0.5577966338368999 | T | T | T |
| 0.5831229346441166 | 0.4799091440724168 | 0.5584229838699335 | T | T | T |
| 0.5850612667721715 | 0.9802922463448142 | 0.5578406887151111 | T | T | T |
| 0.9155933869475980 | 0.4798932403774059 | 0.5583216494433449 | T | T | T |
| 0.9173166355038566 | 0.9805846640055379 | 0.5579659715962246 | T | T | T |
| 0.0836708873363717 | 0.2909895785379358 | 0.5730664672323170 | T | T | T |
| 0.0841618964469777 | 0.7920215329050676 | 0.5731847199487494 | T | T | T |
| 0.4150401236973800 | 0.2928937926943352 | 0.5737794816096133 | T | T | T |

|                    |                    |                    |   |   |   |
|--------------------|--------------------|--------------------|---|---|---|
| 0.4166231472648212 | 0.7915407390703708 | 0.5729113262497302 | T | T | T |
| 0.7491486488980655 | 0.2889941811874172 | 0.5728775803106104 | T | T | T |
| 0.7496998403897349 | 0.7921041093815849 | 0.5739082569836854 | T | T | T |
| 0.0854179750789648 | 0.1165951156011976 | 0.6245937791692696 | T | T | T |
| 0.0709864610425525 | 0.6121811608067611 | 0.6251747766242515 | T | T | T |
| 0.4254691994153625 | 0.1151813622172055 | 0.6253097942198584 | T | T | T |
| 0.9181984884337963 | 0.9042089123292881 | 0.6386659758921022 | T | T | T |
| 0.7457184842132297 | 0.1165149167422002 | 0.6233077140775455 | T | T | T |
| 0.5848867785687036 | 0.9017944913868863 | 0.6382893442020718 | T | T | T |
| 0.9171880137296275 | 0.3957196591065553 | 0.6383341451743656 | T | T | T |
| 0.2518434181665745 | 0.9023546378349794 | 0.6383114205544265 | T | T | T |
| 0.4196236122690228 | 0.6037372865544347 | 0.6232540808874170 | T | T | T |
| 0.7642440649835258 | 0.6079037815413091 | 0.6245958639730761 | T | T | T |
| 0.2513121722989597 | 0.4053397302746974 | 0.6387006387899394 | T | T | T |
| 0.5814550479552860 | 0.3994046809244535 | 0.6385702124063947 | T | T | T |
| 0.6736389320382296 | 0.6250890392092361 | 0.6652787968871168 | T | T | T |

2"

|                    |                     |                     |  |  |  |
|--------------------|---------------------|---------------------|--|--|--|
| 1.0000000000000000 |                     |                     |  |  |  |
| 8.5086002349999994 | 0.0000000000000000  | 0.0000000000000000  |  |  |  |
| 0.0000000000000000 | 10.8548107146999993 | 0.0000000000000000  |  |  |  |
| 0.0000000000000000 | 0.0000000000000000  | 30.0000000000000000 |  |  |  |

Co H O

24 46 62

Selective dynamics

Direct

|                    |                    |                    |   |   |   |
|--------------------|--------------------|--------------------|---|---|---|
| 0.5840564239713769 | 0.5487817405663196 | 0.4005796548467557 | T | T | T |
| 0.2396925201536682 | 0.5487222718982843 | 0.3969861146977367 | T | T | T |
| 0.5873454172567208 | 0.0494849181914507 | 0.4001443636308770 | T | T | T |
| 0.2524417053649471 | 0.0491034060694438 | 0.4003713841631742 | T | T | T |
| 0.9194080271274940 | 0.0521824181127473 | 0.4006190661720192 | T | T | T |
| 0.9061630477254090 | 0.5525556428549558 | 0.3936396133950306 | T | T | T |
| 0.0833333129999971 | 0.1817300920000022 | 0.4673556090000019 | F | F | F |
| 0.0833333129999971 | 0.6817300319999973 | 0.4673556090000019 | F | F | F |
| 0.4166666870000029 | 0.1817300920000022 | 0.4673556090000019 | F | F | F |
| 0.4166666870000029 | 0.6817300319999973 | 0.4673556090000019 | F | F | F |
| 0.7500000000000000 | 0.1817300920000022 | 0.4673556090000019 | F | F | F |
| 0.7500000000000000 | 0.6817300319999973 | 0.4673556090000019 | F | F | F |
| 0.2500000000000000 | 0.3182699680000027 | 0.5326443909999981 | F | F | F |
| 0.2500000000000000 | 0.8182699079999978 | 0.5326443909999981 | F | F | F |
| 0.5833333129999971 | 0.3182699680000027 | 0.5326443909999981 | F | F | F |
| 0.5833333129999971 | 0.8182699079999978 | 0.5326443909999981 | F | F | F |
| 0.9166666870000029 | 0.3182699680000027 | 0.5326443909999981 | F | F | F |
| 0.9166666870000029 | 0.8182699079999978 | 0.5326443909999981 | F | F | F |
| 0.0938369522745910 | 0.4474443571450444 | 0.6063603866049695 | T | T | T |
| 0.0805919728725061 | 0.9478175818872527 | 0.5993809338279805 | T | T | T |
| 0.7475582946350534 | 0.9508965939305567 | 0.5996286158368256 | T | T | T |
| 0.4126545827432785 | 0.9505150818085493 | 0.5998556363691231 | T | T | T |
| 0.7603074798463322 | 0.4512777281017157 | 0.6030138853022630 | T | T | T |
| 0.4159435760286231 | 0.4512182594336799 | 0.5994203451532445 | T | T | T |
| 0.5636188464392567 | 0.6897036956045155 | 0.3303486038695460 | T | T | T |
| 0.4926190885506518 | 0.3791957955878367 | 0.3585192332339899 | T | T | T |
| 0.7953699992470986 | 0.3652011394354198 | 0.3603888863858588 | T | T | T |
| 0.7551151452324130 | 0.0528662629921419 | 0.3346238263394608 | T | T | T |
| 0.0866139243421595 | 0.5511448111960152 | 0.3260632920873647 | T | T | T |
| 0.1297183869981608 | 0.3588604162832782 | 0.3604311098061588 | T | T | T |
| 0.0150034898595060 | 0.8729314945589109 | 0.3617455462292426 | T | T | T |
| 0.4225073553815401 | 0.0408410066762901 | 0.3348658496161777 | T | T | T |
| 0.3331908782967625 | 0.8618040356164069 | 0.3568650443202541 | T | T | T |
| 0.0865824683865166 | 0.0470143336941228 | 0.3352719671786483 | T | T | T |
| 0.7233750912199846 | 0.8790456526082109 | 0.3684467319139413 | T | T | T |
| 0.2475849231429364 | 0.2989955826968425 | 0.3978913012216792 | T | T | T |
| 0.2450556588767401 | 0.8075956849318987 | 0.4014246408269501 | T | T | T |

|                    |                    |                    |   |   |   |
|--------------------|--------------------|--------------------|---|---|---|
| 0.5820866242284255 | 0.2876750041321718 | 0.4054986269251230 | T | T | T |
| 0.5856843906155592 | 0.8153939811816253 | 0.3964609376711969 | T | T | T |
| 0.9135752399216540 | 0.3035141504464719 | 0.3959737970745817 | T | T | T |
| 0.9155698189062799 | 0.7974885574402061 | 0.4067633996542552 | T | T | T |
| 0.0833333129999971 | 0.4317300920000022 | 0.4673556090000019 | F | F | F |
| 0.0833333129999971 | 0.9317300920000022 | 0.4673556090000019 | F | F | F |
| 0.4166666870000029 | 0.4317300920000022 | 0.4673556090000019 | F | F | F |
| 0.4166666870000029 | 0.9317300920000022 | 0.4673556090000019 | F | F | F |
| 0.7500000000000000 | 0.4317300920000022 | 0.4673556090000019 | F | F | F |
| 0.7500000000000000 | 0.9317300920000022 | 0.4673556090000019 | F | F | F |
| 0.2500000000000000 | 0.0682699079999978 | 0.5326443909999981 | F | F | F |
| 0.2500000000000000 | 0.5682699079999978 | 0.5326443909999981 | F | F | F |
| 0.5833333129999971 | 0.0682699079999978 | 0.5326443909999981 | F | F | F |
| 0.5833333129999971 | 0.5682699079999978 | 0.5326443909999981 | F | F | F |
| 0.9166666870000029 | 0.0682699079999978 | 0.5326443909999981 | F | F | F |
| 0.9166666870000029 | 0.5682699079999978 | 0.5326443909999981 | F | F | F |
| 0.0844301810937200 | 0.2025114425597932 | 0.5932366003457447 | T | T | T |
| 0.0864247600783459 | 0.6964858495535281 | 0.6040262029254184 | T | T | T |
| 0.4143156093844407 | 0.1846060188183750 | 0.6035390623288026 | T | T | T |
| 0.4179133757715739 | 0.7123249958678280 | 0.5945013730748766 | T | T | T |
| 0.7549443411232599 | 0.1924043150681015 | 0.5985753591730497 | T | T | T |
| 0.7524150768570638 | 0.7010044173031578 | 0.6021086987783207 | T | T | T |
| 0.2766249087800157 | 0.1209543473917891 | 0.6315532680860585 | T | T | T |
| 0.9134175316134837 | 0.9529856663058774 | 0.6647280328213518 | T | T | T |
| 0.6668091217032371 | 0.1381959643835931 | 0.6431349556797457 | T | T | T |
| 0.5774926446184602 | 0.9591589933237096 | 0.6651341503838228 | T | T | T |
| 0.9849965101404938 | 0.1270685054410887 | 0.6382544537707565 | T | T | T |
| 0.8702816130018395 | 0.6411395837167218 | 0.6395688901938414 | T | T | T |
| 0.9133860756578405 | 0.4488551888039854 | 0.6739367079126352 | T | T | T |
| 0.2448848547675863 | 0.9471337370078579 | 0.6653761736605389 | T | T | T |
| 0.2046300007529015 | 0.6347988605645729 | 0.6396111136141418 | T | T | T |
| 0.5073809114493487 | 0.6208042044121628 | 0.6414807667660093 | T | T | T |
| 0.4363811535607430 | 0.3102963043954849 | 0.6696513961304466 | T | T | T |
| 0.4468359017935815 | 0.6911599186378531 | 0.3329194501722907 | T | T | T |
| 0.4247671102351276 | 0.5768613872016999 | 0.3567721077487379 | T | T | T |
| 0.7316556283646241 | 0.5992340516935667 | 0.3614625563869316 | T | T | T |
| 0.2344916460362683 | 0.3746214839445069 | 0.3732244210200913 | T | T | T |
| 0.5837308996139765 | 0.3871297587597372 | 0.3783770382727948 | T | T | T |
| 0.7524888033956045 | 0.1027234898416970 | 0.3617450455395709 | T | T | T |
| 0.0818463377275200 | 0.6000235371465403 | 0.3533394090886486 | T | T | T |
| 0.4201939184253964 | 0.0943947032878754 | 0.3610283385891792 | T | T | T |
| 0.2434058637634417 | 0.8838611374329060 | 0.3757530076047011 | T | T | T |
| 0.0863541810407982 | 0.0999585927983416 | 0.3616214039815992 | T | T | T |
| 0.6068827856771102 | 0.8875285897426177 | 0.3744885861394784 | T | T | T |
| 0.9058162453343485 | 0.3735688014162469 | 0.3703509357342083 | T | T | T |
| 0.9136754360485688 | 0.8889103732065164 | 0.3763868279629063 | T | T | T |
| 0.2517004165249714 | 0.2070803580858847 | 0.4266972887162608 | T | T | T |
| 0.2505850168536119 | 0.7118751247841534 | 0.4267190250695155 | T | T | T |
| 0.5827287479808161 | 0.2073847532265156 | 0.4267210356546221 | T | T | T |
| 0.5818631325804389 | 0.7061030180577506 | 0.4264279811299564 | T | T | T |
| 0.9174408470911267 | 0.2098510887686102 | 0.4271174683554316 | T | T | T |
| 0.9165681991819632 | 0.7141548374145292 | 0.4272472333136830 | T | T | T |
| 0.0852292423969932 | 0.0197513446246051 | 0.4420495452968746 | T | T | T |
| 0.0767172517257349 | 0.5183946270532719 | 0.4414089308454606 | T | T | T |
| 0.4194785173931783 | 0.0187611527188559 | 0.4418063149593345 | T | T | T |
| 0.4164238805464607 | 0.5188919355545648 | 0.4414337312713332 | T | T | T |
| 0.7518734287005870 | 0.0204230691008456 | 0.4420737327844958 | T | T | T |
| 0.7463963520454117 | 0.5200442026121491 | 0.4426461703402140 | T | T | T |
| 0.0833333129999971 | 0.3437488080000008 | 0.4914442899999969 | F | F | F |
| 0.0833333129999971 | 0.8437487779999984 | 0.4914442899999969 | F | F | F |
| 0.4166666870000029 | 0.3437488080000008 | 0.4914442899999969 | F | F | F |
| 0.4166666870000029 | 0.8437487779999984 | 0.4914442899999969 | F | F | F |
| 0.7500000000000000 | 0.3437488080000008 | 0.4914442899999969 | F | F | F |

|                    |                    |                    |       |
|--------------------|--------------------|--------------------|-------|
| 0.7500000000000000 | 0.8437487779999984 | 0.4914442899999969 | F F F |
| 0.2500000000000000 | 0.1562512220000016 | 0.5085557100000031 | F F F |
| 0.2500000000000000 | 0.6562511919999992 | 0.5085557100000031 | F F F |
| 0.5833333129999971 | 0.1562512220000016 | 0.5085557100000031 | F F F |
| 0.5833333129999971 | 0.6562511919999992 | 0.5085557100000031 | F F F |
| 0.9166666870000029 | 0.1562512220000016 | 0.5085557100000031 | F F F |
| 0.9166666870000029 | 0.6562511919999992 | 0.5085557100000031 | F F F |
| 0.2536036479545878 | 0.4799557973878508 | 0.5573538296597857 | T T T |
| 0.2481265712994130 | 0.9795769308991543 | 0.5579262672155042 | T T T |
| 0.5835761194535387 | 0.4811080644454276 | 0.5585662687286596 | T T T |
| 0.5805214826068222 | 0.9812388472811446 | 0.5581936850406654 | T T T |
| 0.9232827482742650 | 0.4816053729467287 | 0.5585910691545396 | T T T |
| 0.9147707576030067 | 0.9802486553753946 | 0.5579504547031258 | T T T |
| 0.0834318008180367 | 0.2858451625854708 | 0.5727527666863174 | T T T |
| 0.0825591529088735 | 0.7901489112313900 | 0.5728825316445680 | T T T |
| 0.4181368674195610 | 0.2938969819422496 | 0.5735720188700439 | T T T |
| 0.4172712520191850 | 0.7926152467734836 | 0.5732789643453775 | T T T |
| 0.7494149831463878 | 0.2881248752158468 | 0.5732809749304847 | T T T |
| 0.7482995834750289 | 0.7929196419141155 | 0.5733027112837390 | T T T |
| 0.0863245639514311 | 0.1110896267934830 | 0.6236131720370934 | T T T |
| 0.0941837546656515 | 0.6264311985837535 | 0.6296490642657917 | T T T |
| 0.3931172143228902 | 0.1124714102573825 | 0.6255114138605212 | T T T |
| 0.9136458189592017 | 0.9000414072016583 | 0.6383785960184006 | T T T |
| 0.7565941362365585 | 0.1161388625670939 | 0.6242469923952982 | T T T |
| 0.5798060815746031 | 0.9056052967121251 | 0.6389716614108211 | T T T |
| 0.9181536622724799 | 0.3999764628534598 | 0.6466605909113515 | T T T |
| 0.2475111966043952 | 0.8972765101583035 | 0.6382549544604288 | T T T |
| 0.4162691003860232 | 0.6128702412402629 | 0.6216229617272051 | T T T |
| 0.7655083539637316 | 0.6253785160554931 | 0.6267755789799091 | T T T |
| 0.2683443716353759 | 0.4007659483064331 | 0.6385374436130684 | T T T |
| 0.5752328897648720 | 0.4231386127982998 | 0.6432278922512619 | T T T |
| 0.5531640982064185 | 0.3088400813621474 | 0.6670805498277094 | T T T |

2'''

|                    |                     |                     |  |
|--------------------|---------------------|---------------------|--|
| 1.0000000000000000 |                     |                     |  |
| 8.5086002349999994 | 0.0000000000000000  | 0.0000000000000000  |  |
| 0.0000000000000000 | 10.8548107146999993 | 0.0000000000000000  |  |
| 0.0000000000000000 | 0.0000000000000000  | 30.0000000000000000 |  |

Co H O  
24 46 62

Selective dynamics

Direct

|                    |                    |                    |       |
|--------------------|--------------------|--------------------|-------|
| 0.2482886314022864 | 0.0499111675862275 | 0.4008751191022143 | T T T |
| 0.2487205547989651 | 0.5501959503684672 | 0.4005365980581867 | T T T |
| 0.5814537636789802 | 0.0498438480281218 | 0.4008235073885036 | T T T |
| 0.5857018132899542 | 0.5501809936479688 | 0.4005422268722404 | T T T |
| 0.9150936358036162 | 0.0502080537480295 | 0.4009347953111790 | T T T |
| 0.9172418649292003 | 0.5516447577077211 | 0.4001925545381260 | T T T |
| 0.0833333129999971 | 0.1817300920000022 | 0.4673556090000019 | F F F |
| 0.0833333129999971 | 0.6817300319999973 | 0.4673556090000019 | F F F |
| 0.4166666870000029 | 0.1817300920000022 | 0.4673556090000019 | F F F |
| 0.4166666870000029 | 0.6817300319999973 | 0.4673556090000019 | F F F |
| 0.7500000000000000 | 0.1817300920000022 | 0.4673556090000019 | F F F |
| 0.7500000000000000 | 0.6817300319999973 | 0.4673556090000019 | F F F |
| 0.2500000000000000 | 0.3182699680000027 | 0.5326443909999981 | F F F |
| 0.2500000000000000 | 0.8182699079999978 | 0.5326443909999981 | F F F |
| 0.5833333129999971 | 0.3182699680000027 | 0.5326443909999981 | F F F |
| 0.5833333129999971 | 0.8182699079999978 | 0.5326443909999981 | F F F |
| 0.9166666870000029 | 0.3182699680000027 | 0.5326443909999981 | F F F |
| 0.9166666870000029 | 0.8182699079999978 | 0.5326443909999981 | F F F |
| 0.0827581350707995 | 0.4483552422922787 | 0.5998074454618746 | T T T |
| 0.0849063641963836 | 0.9497919462519702 | 0.5990652046888211 | T T T |
| 0.4142981867100459 | 0.4498190063520315 | 0.5994577731277594 | T T T |

|                    |                    |                    |   |   |   |
|--------------------|--------------------|--------------------|---|---|---|
| 0.4185462363210198 | 0.9501561519718785 | 0.5991764926114961 | T | T | T |
| 0.7512794452010347 | 0.4498040496315329 | 0.5994634019418127 | T | T | T |
| 0.7517113685977138 | 0.9500888324137722 | 0.5991248808977853 | T | T | T |
| 0.4173449755348237 | 0.4476587908520714 | 0.3281777695205276 | T | T | T |
| 0.7507895571932955 | 0.5537123150393006 | 0.3348282189833260 | T | T | T |
| 0.7220413118539813 | 0.3816503741746854 | 0.3691598703723354 | T | T | T |
| 0.7460635282213235 | 0.0463499937327719 | 0.3352577114326557 | T | T | T |
| 0.0840180005194999 | 0.5536612523208648 | 0.3348343900532862 | T | T | T |
| 0.1122289498077362 | 0.3817018416930810 | 0.3691448010374488 | T | T | T |
| 0.1398639111129435 | 0.8714980041989013 | 0.3632105075817128 | T | T | T |
| 0.4124861253096261 | 0.0471433668289831 | 0.3349991641048638 | T | T | T |
| 0.4761103015548998 | 0.8716532814700729 | 0.3617796117613377 | T | T | T |
| 0.0794537643190650 | 0.0483086047788080 | 0.3351834358426361 | T | T | T |
| 0.8201988817070154 | 0.8692711290226941 | 0.3602241902206543 | T | T | T |
| 0.2482101428873598 | 0.3137209562603203 | 0.3971946311329952 | T | T | T |
| 0.2521771072400877 | 0.8071091201387692 | 0.3999949577847079 | T | T | T |
| 0.5856536746074686 | 0.3137322156457971 | 0.3971569691336808 | T | T | T |
| 0.5849189243132813 | 0.8073618359969814 | 0.3996355414045362 | T | T | T |
| 0.9169776341927682 | 0.3262176343240603 | 0.3957756880370926 | T | T | T |
| 0.9191358281971449 | 0.8042625914310854 | 0.4015801606498610 | T | T | T |
| 0.0833333129999971 | 0.4317300920000022 | 0.4673556090000019 | F | F | F |
| 0.0833333129999971 | 0.9317300920000022 | 0.4673556090000019 | F | F | F |
| 0.4166666870000029 | 0.4317300920000022 | 0.4673556090000019 | F | F | F |
| 0.4166666870000029 | 0.9317300920000022 | 0.4673556090000019 | F | F | F |
| 0.7500000000000000 | 0.4317300920000022 | 0.4673556090000019 | F | F | F |
| 0.7500000000000000 | 0.9317300920000022 | 0.4673556090000019 | F | F | F |
| 0.2500000000000000 | 0.0682699079999978 | 0.5326443909999981 | F | F | F |
| 0.2500000000000000 | 0.5682699079999978 | 0.5326443909999981 | F | F | F |
| 0.5833333129999971 | 0.0682699079999978 | 0.5326443909999981 | F | F | F |
| 0.5833333129999971 | 0.5682699079999978 | 0.5326443909999981 | F | F | F |
| 0.9166666870000029 | 0.0682699079999978 | 0.5326443909999981 | F | F | F |
| 0.9166666870000029 | 0.5682699079999978 | 0.5326443909999981 | F | F | F |
| 0.0808641718028547 | 0.1957374085689145 | 0.5984198393501385 | T | T | T |
| 0.0830223658072319 | 0.6737823656759396 | 0.6042243119629074 | T | T | T |
| 0.4150810756867183 | 0.1926381640030190 | 0.6003644585954638 | T | T | T |
| 0.4143463253925310 | 0.6862677843542028 | 0.6028430308663192 | T | T | T |
| 0.7478228927599120 | 0.1928908798612310 | 0.6000050422152923 | T | T | T |
| 0.7517898571126399 | 0.6862790437396796 | 0.6028053688670050 | T | T | T |
| 0.1798011182929844 | 0.1307288709773059 | 0.6397758097793455 | T | T | T |
| 0.9205462356809347 | 0.9516913952211917 | 0.6648165641573639 | T | T | T |
| 0.5238896984451001 | 0.1283467185299271 | 0.6382203882386622 | T | T | T |
| 0.5875138746903737 | 0.9528566331710167 | 0.6650008358951369 | T | T | T |
| 0.8601360888870562 | 0.1285019958010983 | 0.6367894924182874 | T | T | T |
| 0.8877710501922569 | 0.6182981583069188 | 0.6308551989625514 | T | T | T |
| 0.9159819994805004 | 0.4463387476791348 | 0.6651656099467137 | T | T | T |
| 0.2539364717786760 | 0.9536500062672282 | 0.6647422885673437 | T | T | T |
| 0.2779586881460187 | 0.6183496258253147 | 0.6308401296276640 | T | T | T |
| 0.2492104428067041 | 0.4462876849606990 | 0.6651717810166744 | T | T | T |
| 0.5826550244651769 | 0.5523412091479285 | 0.6718222304794722 | T | T | T |
| 0.4171698371479312 | 0.5353434947193100 | 0.3192214569429776 | T | T | T |
| 0.4172485502978399 | 0.5971927218293325 | 0.3621015139686948 | T | T | T |
| 0.7504247166738657 | 0.6038418841945755 | 0.3619136330475951 | T | T | T |
| 0.2298438055839285 | 0.3871310719558525 | 0.3749669745282684 | T | T | T |
| 0.6043561972966787 | 0.3871490363649701 | 0.3749537103992658 | T | T | T |
| 0.7482097861456773 | 0.0975981533736830 | 0.3620337071398159 | T | T | T |
| 0.0842069541540460 | 0.6037656986814043 | 0.3619243334229945 | T | T | T |
| 0.4147238946109178 | 0.0976259500581038 | 0.3619645099847378 | T | T | T |
| 0.2458248521193571 | 0.8835699809738162 | 0.3758785246155951 | T | T | T |
| 0.0817375929867794 | 0.0987654450738799 | 0.3621578465815665 | T | T | T |
| 0.5796355291578206 | 0.8837316963760058 | 0.3756876761466099 | T | T | T |
| 0.9171145046944355 | 0.3951583480999564 | 0.3730946285662903 | T | T | T |
| 0.9182976738970469 | 0.8837834693359458 | 0.3765598857145082 | T | T | T |
| 0.2505128397512270 | 0.2074720240253675 | 0.4270390579361097 | T | T | T |

0.2517852236443934 0.7085104355429162 0.4268843110865838 T T T  
 0.5826684497778519 0.2073991071704705 0.4269987264556250 T T T  
 0.5828312260863413 0.7084936675297990 0.4268679773152748 T T T  
 0.9164035001654983 0.2066113104930727 0.4274631364206056 T T T  
 0.9172068562819684 0.7106061975468773 0.4272616111157578 T T T  
 0.0822524037081694 0.0198341834238027 0.4422952603872812 T T T  
 0.0827407897929833 0.5204675143537976 0.4420871255993500 T T T  
 0.4153461173038460 0.0196139697642360 0.4422295769456698 T T T  
 0.4170820508413522 0.5186857709304630 0.4417018444708879 T T T  
 0.7485511900848060 0.0196862706588193 0.4422351458978933 T T T  
 0.7514261940831517 0.5204846509809798 0.4420786696493060 T T T  
 0.0833333129999971 0.3437488080000008 0.4914442899999969 F F F  
 0.0833333129999971 0.8437487779999984 0.4914442899999969 F F F  
 0.4166666870000029 0.3437488080000008 0.4914442899999969 F F F  
 0.4166666870000029 0.8437487779999984 0.4914442899999969 F F F  
 0.7500000000000000 0.3437488080000008 0.4914442899999969 F F F  
 0.7500000000000000 0.8437487779999984 0.4914442899999969 F F F  
 0.2500000000000000 0.1562512220000016 0.5085557100000031 F F F  
 0.2500000000000000 0.6562511919999992 0.5085557100000031 F F F  
 0.5833333129999971 0.1562512220000016 0.5085557100000031 F F F  
 0.5833333129999971 0.6562511919999992 0.5085557100000031 F F F  
 0.9166666870000029 0.1562512220000016 0.5085557100000031 F F F  
 0.9166666870000029 0.6562511919999992 0.5085557100000031 F F F  
 0.2485738059168485 0.4795153490190200 0.5579213303506939 T T T  
 0.2514488099151944 0.9803137293411802 0.5577648541021069 T T T  
 0.5829179491586487 0.4813142290695372 0.5582981555291118 T T T  
 0.5846538826961545 0.9803860302357640 0.5577704230543298 T T T  
 0.9172592102070170 0.4795324856462022 0.5579128744006504 T T T  
 0.9177475962918309 0.9801658165761979 0.5577047396127190 T T T  
 0.0827931437180320 0.2893938024531232 0.5727383888842421 T T T  
 0.0835964998345012 0.7933886895069271 0.5725368635793946 T T T  
 0.4171687739136588 0.2915063324702014 0.5731320226847251 T T T  
 0.4173315502221481 0.7926008928295296 0.5730012735443744 T T T  
 0.7482147763556068 0.2914895644570837 0.5731156889134164 T T T  
 0.7494871602487729 0.7925279759746329 0.5729609420638903 T T T  
 0.0817023261029530 0.1162165306640543 0.6234401142854922 T T T  
 0.0828854953055644 0.6048416519000435 0.6269053714337097 T T T  
 0.4203644708421799 0.1162683036239943 0.6243123238533902 T T T  
 0.9182624070132204 0.9012345549261199 0.6378421534184332 T T T  
 0.7541751478806427 0.1164300190261841 0.6241214753844050 T T T  
 0.5852761053890825 0.9023740499418963 0.6380354900152618 T T T  
 0.9157930458459541 0.3962343013185956 0.6380756665770052 T T T  
 0.2517902138543224 0.9024018466263174 0.6379662928601840 T T T  
 0.3956438027033211 0.6128509636350297 0.6250462896007343 T T T  
 0.7701561944160720 0.6128689280441476 0.6250330254717317 T T T  
 0.2495752833261344 0.3961581158054244 0.6380863669524046 T T T  
 0.5827514497021601 0.4028072781706677 0.6378984860313057 T T T  
 0.5828301628520688 0.4646565052806902 0.6807785430570232 T T T

3

1.00000000000000  
 8.5086002349999994 0.0000000000000000 0.0000000000000000  
 0.0000000000000000 10.8548107146999993 0.0000000000000000  
 0.0000000000000000 0.0000000000000000 30.0000000000000000

Co H O

24 44 62

Selective dynamics

Direct

0.5791976069059431 0.5531041526651422 0.3997407084395946 T T T  
 0.2547784882231738 0.5532265063195325 0.3993043798906726 T T T  
 0.5809199454280647 0.0495768370107754 0.4006459326265102 T T T  
 0.2479494838892009 0.0458040891074489 0.3999196892545242 T T T  
 0.9146014568097626 0.0473064008034783 0.4001331364258718 T T T

|                    |                    |                    |   |   |   |
|--------------------|--------------------|--------------------|---|---|---|
| 0.9174838122117633 | 0.5509832542096121 | 0.3999925067003147 | T | T | T |
| 0.0833333129999971 | 0.1817300920000022 | 0.4673556090000019 | F | F | F |
| 0.0833333129999971 | 0.6817300319999973 | 0.4673556090000019 | F | F | F |
| 0.4166666870000029 | 0.1817300920000022 | 0.4673556090000019 | F | F | F |
| 0.4166666870000029 | 0.6817300319999973 | 0.4673556090000019 | F | F | F |
| 0.7500000000000000 | 0.1817300920000022 | 0.4673556090000019 | F | F | F |
| 0.7500000000000000 | 0.6817300319999973 | 0.4673556090000019 | F | F | F |
| 0.2500000000000000 | 0.3182699680000027 | 0.5326443909999981 | F | F | F |
| 0.2500000000000000 | 0.8182699079999978 | 0.5326443909999981 | F | F | F |
| 0.5833333129999971 | 0.3182699680000027 | 0.5326443909999981 | F | F | F |
| 0.5833333129999971 | 0.8182699079999978 | 0.5326443909999981 | F | F | F |
| 0.9166666870000029 | 0.3182699680000027 | 0.5326443909999981 | F | F | F |
| 0.9166666870000029 | 0.8182699079999978 | 0.5326443909999981 | F | F | F |
| 0.0825161877882294 | 0.4490167457903809 | 0.6000074932996854 | T | T | T |
| 0.0853985431902373 | 0.9526935991965216 | 0.5998668635741283 | T | T | T |
| 0.7520505161107991 | 0.9541959108925511 | 0.6000803107454757 | T | T | T |
| 0.4190800545719355 | 0.9504231629892246 | 0.5993540673734897 | T | T | T |
| 0.7452215117768262 | 0.4467734936804675 | 0.6006956201093204 | T | T | T |
| 0.4208023930940570 | 0.4468958473348579 | 0.6002592915604055 | T | T | T |
| 0.7466804903340858 | 0.5547836261823207 | 0.3341709660882586 | T | T | T |
| 0.7158133867652338 | 0.3803972269092597 | 0.3706304769581408 | T | T | T |
| 0.7440720151886139 | 0.0444601802643945 | 0.3346905133086864 | T | T | T |
| 0.0978023131417203 | 0.5395323666881352 | 0.3364808188784138 | T | T | T |
| 0.9786954693946939 | 0.3688667730345543 | 0.3530944353762706 | T | T | T |
| 0.1439125808105289 | 0.8697174832194249 | 0.3632314627604672 | T | T | T |
| 0.4142944872500252 | 0.0485842954914162 | 0.3340686101351125 | T | T | T |
| 0.4648108975543508 | 0.8733583911832882 | 0.3640192353574249 | T | T | T |
| 0.0792171965528823 | 0.0453842883077229 | 0.3340929462585648 | T | T | T |
| 0.8275578292679526 | 0.8671735318250101 | 0.3580343427509618 | T | T | T |
| 0.2518435669617176 | 0.2773639988322784 | 0.4044117021121494 | T | T | T |
| 0.2520902173501014 | 0.7991874022194096 | 0.4031371985827193 | T | T | T |
| 0.5790460649878001 | 0.3153504724598335 | 0.3984279686401777 | T | T | T |
| 0.5852189523552555 | 0.8104819657123200 | 0.3979597663283058 | T | T | T |
| 0.9149363141551988 | 0.2918731311658150 | 0.4038098349507351 | T | T | T |
| 0.9187188948649024 | 0.7997056247818790 | 0.4020144653994180 | T | T | T |
| 0.0833333129999971 | 0.4317300920000022 | 0.4673556090000019 | F | F | F |
| 0.0833333129999971 | 0.9317300920000022 | 0.4673556090000019 | F | F | F |
| 0.4166666870000029 | 0.4317300920000022 | 0.4673556090000019 | F | F | F |
| 0.4166666870000029 | 0.9317300920000022 | 0.4673556090000019 | F | F | F |
| 0.7500000000000000 | 0.4317300920000022 | 0.4673556090000019 | F | F | F |
| 0.7500000000000000 | 0.9317300920000022 | 0.4673556090000019 | F | F | F |
| 0.2500000000000000 | 0.0682699079999978 | 0.5326443909999981 | F | F | F |
| 0.2500000000000000 | 0.5682699079999978 | 0.5326443909999981 | F | F | F |
| 0.5833333129999971 | 0.0682699079999978 | 0.5326443909999981 | F | F | F |
| 0.5833333129999971 | 0.5682699079999978 | 0.5326443909999981 | F | F | F |
| 0.9166666870000029 | 0.0682699079999978 | 0.5326443909999981 | F | F | F |
| 0.9166666870000029 | 0.5682699079999978 | 0.5326443909999981 | F | F | F |
| 0.0812811051350977 | 0.2002943752181210 | 0.5979855346005820 | T | T | T |
| 0.0850636858447942 | 0.7081268688341851 | 0.5961901650492720 | T | T | T |
| 0.4147810476447447 | 0.1895180342876799 | 0.6020402336716941 | T | T | T |
| 0.4209539350122001 | 0.6846495275401665 | 0.6015720313598293 | T | T | T |
| 0.7479097826498986 | 0.2008125977805903 | 0.5968628014172809 | T | T | T |
| 0.7481564330382823 | 0.7226360011677216 | 0.5955882978878505 | T | T | T |
| 0.1724421707320474 | 0.1328264681749900 | 0.6419656572490383 | T | T | T |
| 0.9207828034471176 | 0.9546157116922771 | 0.6659070537414351 | T | T | T |
| 0.5351891024456491 | 0.1266416088167120 | 0.6359807646425821 | T | T | T |
| 0.5857055127499750 | 0.9514157045085838 | 0.6659313898648876 | T | T | T |
| 0.8560874191894711 | 0.1302825167805679 | 0.6367685372395258 | T | T | T |
| 0.0213045306053061 | 0.6311332269654458 | 0.6469055646237294 | T | T | T |
| 0.9021976868582798 | 0.4604676333118647 | 0.6635191811215861 | T | T | T |
| 0.2559279848113861 | 0.9555398197356054 | 0.6653094866913137 | T | T | T |
| 0.2841866132347662 | 0.6196027730907474 | 0.6293695230418662 | T | T | T |
| 0.2533195096659143 | 0.4452163738176793 | 0.6658290339117415 | T | T | T |

|                    |                    |                    |   |   |   |
|--------------------|--------------------|--------------------|---|---|---|
| 0.2009598948924491 | 0.3832296916078377 | 0.3337660379570409 | T | T | T |
| 0.4221570774382641 | 0.5928158146660393 | 0.3642435284932403 | T | T | T |
| 0.7483696981760345 | 0.6032318889242205 | 0.3616568129194348 | T | T | T |
| 0.2534017975554476 | 0.3954016846669432 | 0.3752848093742643 | T | T | T |
| 0.5986030016265859 | 0.3884936121028417 | 0.3759992225253086 | T | T | T |
| 0.7480520506037250 | 0.0954961163126100 | 0.3615141421825570 | T | T | T |
| 0.0861424703837557 | 0.5998259310974773 | 0.3609314083539700 | T | T | T |
| 0.4138997616588397 | 0.0964725422593204 | 0.3616635631998192 | T | T | T |
| 0.2490044409190943 | 0.8822926740524509 | 0.3765055481147642 | T | T | T |
| 0.0815022181695682 | 0.0945330986603352 | 0.3613903245278607 | T | T | T |
| 0.5742524901736205 | 0.8840800642510515 | 0.3746347115290121 | T | T | T |
| 0.9042407595512287 | 0.3849403856751507 | 0.3773488825042363 | T | T | T |
| 0.9204429315627252 | 0.8823736228101139 | 0.3765279397559525 | T | T | T |
| 0.2496953764259260 | 0.2060591305316350 | 0.4261007418578515 | T | T | T |
| 0.2509938984616084 | 0.7107103178745221 | 0.4272079375609081 | T | T | T |
| 0.5820785752732009 | 0.2076147986114663 | 0.4269653138232811 | T | T | T |
| 0.5835396024898217 | 0.7085327743188899 | 0.4270778698282741 | T | T | T |
| 0.9167469788403794 | 0.2076876227603890 | 0.4263961194856876 | T | T | T |
| 0.9174697269513247 | 0.7092853293733655 | 0.4268021370975532 | T | T | T |
| 0.0820030497523376 | 0.0190728893852992 | 0.4419995222308444 | T | T | T |
| 0.0840994078631141 | 0.5199955797387190 | 0.4414663769554678 | T | T | T |
| 0.4146257565078600 | 0.0191496581385024 | 0.4420869262468231 | T | T | T |
| 0.4168756974524470 | 0.5195632317920698 | 0.4420031041432751 | T | T | T |
| 0.7485920915089750 | 0.0192097006754395 | 0.4420194413876146 | T | T | T |
| 0.7504333110079173 | 0.5204834070281733 | 0.4416119434921697 | T | T | T |
| 0.0833333129999971 | 0.3437488080000008 | 0.4914442899999969 | F | F | F |
| 0.0833333129999971 | 0.8437487779999984 | 0.4914442899999969 | F | F | F |
| 0.4166666870000029 | 0.3437488080000008 | 0.4914442899999969 | F | F | F |
| 0.4166666870000029 | 0.8437487779999984 | 0.4914442899999969 | F | F | F |
| 0.7500000000000000 | 0.3437488080000008 | 0.4914442899999969 | F | F | F |
| 0.7500000000000000 | 0.8437487779999984 | 0.4914442899999969 | F | F | F |
| 0.2500000000000000 | 0.1562512220000016 | 0.5085557100000031 | F | F | F |
| 0.2500000000000000 | 0.6562511919999992 | 0.5085557100000031 | F | F | F |
| 0.5833333129999971 | 0.1562512220000016 | 0.5085557100000031 | F | F | F |
| 0.5833333129999971 | 0.6562511919999992 | 0.5085557100000031 | F | F | F |
| 0.9166666870000029 | 0.1562512220000016 | 0.5085557100000031 | F | F | F |
| 0.9166666870000029 | 0.6562511919999992 | 0.5085557100000031 | F | F | F |
| 0.2495666889920827 | 0.4795165929718266 | 0.5583880565078302 | T | T | T |
| 0.2514079084910250 | 0.9807902993245605 | 0.5579805586123853 | T | T | T |
| 0.5831243025475530 | 0.4804367682079302 | 0.5579968958567249 | T | T | T |
| 0.5853742434921401 | 0.9808503418614976 | 0.5579130737531770 | T | T | T |
| 0.9159005921368860 | 0.4800044202612810 | 0.5585336230445321 | T | T | T |
| 0.9179969502476624 | 0.9809271106147009 | 0.5580004777691556 | T | T | T |
| 0.0825302730486683 | 0.2907146706266346 | 0.5731978629024468 | T | T | T |
| 0.0832530211596207 | 0.7923123772396110 | 0.5736038805143053 | T | T | T |
| 0.4164603975101783 | 0.2914672256811102 | 0.5729221301717260 | T | T | T |
| 0.4179214247267993 | 0.7923852013885339 | 0.5730346861767116 | T | T | T |
| 0.7490061015383914 | 0.2892896821254710 | 0.5727920624390919 | T | T | T |
| 0.7503046235740740 | 0.7939408694683651 | 0.5738992581421485 | T | T | T |
| 0.0795570684372748 | 0.1176263771898860 | 0.6234720602440477 | T | T | T |
| 0.0957592404487713 | 0.6150596143248492 | 0.6226511174957635 | T | T | T |
| 0.4257475098263797 | 0.1159199357489484 | 0.6253652884709878 | T | T | T |
| 0.9184977818304317 | 0.9054669013396648 | 0.6386096754721322 | T | T | T |
| 0.7509955590809057 | 0.1177073259475492 | 0.6234944518852360 | T | T | T |
| 0.5861002383411601 | 0.9035274577406796 | 0.6383364368001807 | T | T | T |
| 0.9138575296162442 | 0.4001740689025226 | 0.6390685916460298 | T | T | T |
| 0.2519479493962750 | 0.9045038836873900 | 0.6384858578174429 | T | T | T |
| 0.4013969983734142 | 0.6115063878971584 | 0.6240007774746985 | T | T | T |
| 0.7465982024445522 | 0.6045983153330566 | 0.6247151906257358 | T | T | T |
| 0.2516303018239653 | 0.3967681110757794 | 0.6383431870805650 | T | T | T |
| 0.5778429225617359 | 0.4071841853339606 | 0.6357564715067596 | T | T | T |
| 0.7990401051075506 | 0.6167703083921622 | 0.6662339620429593 | T | T | T |



3'

1.0000000000000000  
8.5086002349999994 0.0000000000000000 0.0000000000000000  
0.0000000000000000 10.8548107146999993 0.0000000000000000  
0.0000000000000000 0.0000000000000000 30.0000000000000000

Co H O

24 44 62

Selective dynamics

Direct

|                    |                    |                    |       |
|--------------------|--------------------|--------------------|-------|
| 0.2482831340190049 | 0.0462792768820614 | 0.4000259898829107 | T T T |
| 0.2506910891196494 | 0.5539586038694918 | 0.3998071845356814 | T T T |
| 0.5816189040890984 | 0.0503217632493503 | 0.4007961842143548 | T T T |
| 0.5838133053875342 | 0.5481329191314469 | 0.4005275013649708 | T T T |
| 0.9148546515251949 | 0.0492545460941437 | 0.4006769283588424 | T T T |
| 0.9180443853479892 | 0.5503067175020631 | 0.4003182841464357 | T T T |
| 0.0833333129999971 | 0.1817300920000022 | 0.4673556090000019 | F F F |
| 0.0833333129999971 | 0.6817300319999973 | 0.4673556090000019 | F F F |
| 0.4166666870000029 | 0.1817300920000022 | 0.4673556090000019 | F F F |
| 0.4166666870000029 | 0.6817300319999973 | 0.4673556090000019 | F F F |
| 0.7500000000000000 | 0.1817300920000022 | 0.4673556090000019 | F F F |
| 0.7500000000000000 | 0.6817300319999973 | 0.4673556090000019 | F F F |
| 0.2500000000000000 | 0.3182699680000027 | 0.5326443909999981 | F F F |
| 0.2500000000000000 | 0.8182699079999978 | 0.5326443909999981 | F F F |
| 0.5833333129999971 | 0.3182699680000027 | 0.5326443909999981 | F F F |
| 0.5833333129999971 | 0.8182699079999978 | 0.5326443909999981 | F F F |
| 0.9166666870000029 | 0.3182699680000027 | 0.5326443909999981 | F F F |
| 0.9166666870000029 | 0.8182699079999978 | 0.5326443909999981 | F F F |
| 0.0819556146520109 | 0.4496932824979369 | 0.5996817158535643 | T T T |
| 0.0851453484748051 | 0.9507454539058564 | 0.5993230716411575 | T T T |
| 0.4161866946124657 | 0.4518670808685530 | 0.5994724986350293 | T T T |
| 0.4183810959109015 | 0.9496782367506498 | 0.5992038157856451 | T T T |
| 0.7493089108803509 | 0.4460413961305082 | 0.6001928154643188 | T T T |
| 0.7517168659809952 | 0.9537207231179385 | 0.5999740101170893 | T T T |
| 0.4209788977802810 | 0.5452424995725431 | 0.3363120758832787 | T T T |
| 0.7478880343868531 | 0.5296026493241572 | 0.3387020662105769 | T T T |
| 0.7449959155895669 | 0.0436106822536753 | 0.3352679649972996 | T T T |
| 0.0953639029587801 | 0.5449203035600371 | 0.3360855562593270 | T T T |
| 0.0031723257434096 | 0.3688193417051008 | 0.3560104765962160 | T T T |
| 0.1422241397007397 | 0.8706252464357217 | 0.3632751797039670 | T T T |
| 0.4143362640526393 | 0.0464979614654333 | 0.3343621803957623 | T T T |
| 0.4691004277180477 | 0.8725495940072268 | 0.3633710675337252 | T T T |
| 0.0785825785489206 | 0.0472918055718740 | 0.3343425644713804 | T T T |
| 0.8238432034045156 | 0.8686022132261856 | 0.3584449903737508 | T T T |
| 0.2528585202894881 | 0.2766353371095037 | 0.4043102989960071 | T T T |
| 0.2519225005233409 | 0.8020328122323536 | 0.4022274100508132 | T T T |
| 0.5825670676313811 | 0.3291023899950022 | 0.3977653953226168 | T T T |
| 0.5861948568840447 | 0.8094208809263131 | 0.3982108937688040 | T T T |
| 0.9117868236759272 | 0.3084577472929433 | 0.3988296584446152 | T T T |
| 0.9184259561873176 | 0.8039166124331343 | 0.4004439471120140 | T T T |
| 0.0833333129999971 | 0.4317300920000022 | 0.4673556090000019 | F F F |
| 0.0833333129999971 | 0.9317300920000022 | 0.4673556090000019 | F F F |
| 0.4166666870000029 | 0.4317300920000022 | 0.4673556090000019 | F F F |
| 0.4166666870000029 | 0.9317300920000022 | 0.4673556090000019 | F F F |
| 0.7500000000000000 | 0.4317300920000022 | 0.4673556090000019 | F F F |
| 0.7500000000000000 | 0.9317300920000022 | 0.4673556090000019 | F F F |
| 0.2500000000000000 | 0.0682699079999978 | 0.5326443909999981 | F F F |
| 0.2500000000000000 | 0.5682699079999978 | 0.5326443909999981 | F F F |
| 0.5833333129999971 | 0.0682699079999978 | 0.5326443909999981 | F F F |
| 0.5833333129999971 | 0.5682699079999978 | 0.5326443909999981 | F F F |
| 0.9166666870000029 | 0.0682699079999978 | 0.5326443909999981 | F F F |
| 0.9166666870000029 | 0.5682699079999978 | 0.5326443909999981 | F F F |
| 0.0815740438126824 | 0.1960833875668658 | 0.5995560528879861 | T T T |
| 0.0882131763240728 | 0.6915422527070566 | 0.6011703415553847 | T T T |

|                    |                    |                    |   |   |   |
|--------------------|--------------------|--------------------|---|---|---|
| 0.4138051431159552 | 0.1905791190736939 | 0.6017891062311960 | T | T | T |
| 0.4174329323686187 | 0.6708976100049978 | 0.6022346046773831 | T | T | T |
| 0.7480774994766662 | 0.1979671877676465 | 0.5977725899491865 | T | T | T |
| 0.7471414797105119 | 0.7233646628904965 | 0.5956897010039930 | T | T | T |
| 0.1761567965954845 | 0.1313977867738146 | 0.6415550096262422 | T | T | T |
| 0.9214174214510793 | 0.9527081944281260 | 0.6656574355286197 | T | T | T |
| 0.5308995722819523 | 0.1274504059927733 | 0.6366289324662749 | T | T | T |
| 0.5856637359473607 | 0.9535020385345667 | 0.6656378196042378 | T | T | T |
| 0.8577758602992603 | 0.1293747535642784 | 0.6367248202960329 | T | T | T |
| 0.9968276738190380 | 0.6311806582948991 | 0.6439895234037840 | T | T | T |
| 0.9046360970412199 | 0.4550796964399630 | 0.6639144437406730 | T | T | T |
| 0.2550040844104330 | 0.9563893177463247 | 0.6647320350026933 | T | T | T |
| 0.2521119656131470 | 0.4703973506758428 | 0.6612979337894230 | T | T | T |
| 0.5790211022197190 | 0.4547575004274568 | 0.6636879241167213 | T | T | T |
| 0.7857734137169894 | 0.6101923955152067 | 0.6674710006498457 | T | T | T |
| 0.4192881670799578 | 0.6027381742918348 | 0.3615460626857759 | T | T | T |
| 0.7495466465887319 | 0.595540555307408  | 0.3610849725253858 | T | T | T |
| 0.2518568595383580 | 0.3977295031808761 | 0.3756615443015077 | T | T | T |
| 0.5786425497607623 | 0.4015158633671028 | 0.3757991699666468 | T | T | T |
| 0.7484712145404468 | 0.0964157350483462 | 0.3616313842717069 | T | T | T |
| 0.0839695958978478 | 0.6016722198576497 | 0.3615653169306798 | T | T | T |
| 0.4141925404383661 | 0.0961580185975516 | 0.3615295082118786 | T | T | T |
| 0.2478294359821157 | 0.8826274075278350 | 0.3762733543559622 | T | T | T |
| 0.0819175060924691 | 0.0965061709981178 | 0.3616012380867333 | T | T | T |
| 0.5771153212282857 | 0.8839798864288098 | 0.3747595743260588 | T | T | T |
| 0.9135897932533222 | 0.3854110195367612 | 0.3756648618466471 | T | T | T |
| 0.9193510144511776 | 0.8824912522118743 | 0.3760180885313068 | T | T | T |
| 0.2501510234829017 | 0.2060658684073650 | 0.4260637745960011 | T | T | T |
| 0.2508442625981385 | 0.7112256139190336 | 0.4272411847041589 | T | T | T |
| 0.5828738075440935 | 0.2084015698031936 | 0.4269397797192254 | T | T | T |
| 0.5846966006811544 | 0.7079021455625275 | 0.4264429692902663 | T | T | T |
| 0.9163542263412187 | 0.2080143460640484 | 0.4267191605403796 | T | T | T |
| 0.9166851367581117 | 0.7083066080276057 | 0.4267408471318381 | T | T | T |
| 0.0825591511431980 | 0.0193802743697320 | 0.4420889379474935 | T | T | T |
| 0.0849286801924604 | 0.5202085507008518 | 0.4416256401316040 | T | T | T |
| 0.4148484366618847 | 0.0193053827087896 | 0.4420987683893302 | T | T | T |
| 0.4172143898623991 | 0.5202693326654468 | 0.4416102510951733 | T | T | T |
| 0.7487309031204412 | 0.0194383177795188 | 0.4421600921120329 | T | T | T |
| 0.7497811952456443 | 0.5194227178029442 | 0.4416682475945604 | T | T | T |
| 0.0833333129999971 | 0.3437488080000008 | 0.4914442899999969 | F | F | F |
| 0.0833333129999971 | 0.8437487779999984 | 0.4914442899999969 | F | F | F |
| 0.4166666870000029 | 0.3437488080000008 | 0.4914442899999969 | F | F | F |
| 0.4166666870000029 | 0.8437487779999984 | 0.4914442899999969 | F | F | F |
| 0.7500000000000000 | 0.3437488080000008 | 0.4914442899999969 | F | F | F |
| 0.7500000000000000 | 0.8437487779999984 | 0.4914442899999969 | F | F | F |
| 0.2500000000000000 | 0.1562512220000016 | 0.5085557100000031 | F | F | F |
| 0.2500000000000000 | 0.6562511919999992 | 0.5085557100000031 | F | F | F |
| 0.5833333129999971 | 0.1562512220000016 | 0.5085557100000031 | F | F | F |
| 0.5833333129999971 | 0.6562511919999992 | 0.5085557100000031 | F | F | F |
| 0.9166666870000029 | 0.1562512220000016 | 0.5085557100000031 | F | F | F |
| 0.9166666870000029 | 0.6562511919999992 | 0.5085557100000031 | F | F | F |
| 0.2502188047543558 | 0.4805772821970557 | 0.5583317524054395 | T | T | T |
| 0.2512690968795587 | 0.9805616822204811 | 0.5578399078879670 | T | T | T |
| 0.5827856101375939 | 0.4797306673345532 | 0.5583897489048268 | T | T | T |
| 0.5851515633381154 | 0.9806946172912033 | 0.5579012316106698 | T | T | T |
| 0.9150713198075396 | 0.4797914492991483 | 0.5583743598683961 | T | T | T |
| 0.9174408488568018 | 0.9806197256302680 | 0.5579110620525066 | T | T | T |
| 0.0833148632418882 | 0.2916933919723945 | 0.5732591528681619 | T | T | T |
| 0.0836457736587813 | 0.7919856539359517 | 0.5732808394596204 | T | T | T |
| 0.4153033993188457 | 0.2920978544374725 | 0.5735570307097336 | T | T | T |
| 0.4171261924559136 | 0.7915984301968066 | 0.5730602202807745 | T | T | T |
| 0.7491557374018616 | 0.2887743860809663 | 0.5727588152958411 | T | T | T |
| 0.7498489765170983 | 0.7939341315926352 | 0.5739362254039989 | T | T | T |

|                    |                    |                    |   |   |   |
|--------------------|--------------------|--------------------|---|---|---|
| 0.080648985488224  | 0.1175087477881258 | 0.6239819114686932 | T | T | T |
| 0.0864102067466778 | 0.6145889804632388 | 0.6243351381533528 | T | T | T |
| 0.4228846787717140 | 0.1160201135711900 | 0.6252404256739412 | T | T | T |
| 0.9180824939075309 | 0.9034938290018824 | 0.6383987619132666 | T | T | T |
| 0.7521705640178844 | 0.1173725924721650 | 0.6237266456440377 | T | T | T |
| 0.5858074595616337 | 0.9038419814024485 | 0.6384704917881213 | T | T | T |
| 0.9160304041021522 | 0.3983277801423503 | 0.6384346830693204 | T | T | T |
| 0.2515287854595530 | 0.9035842649516539 | 0.6383686157282932 | T | T | T |
| 0.4213574502392446 | 0.5984841366328973 | 0.6242008300333531 | T | T | T |
| 0.7481431404616419 | 0.6022704968191240 | 0.6243384556984993 | T | T | T |
| 0.2504533534112681 | 0.4044594444692592 | 0.6389150274746142 | T | T | T |
| 0.5807118329200422 | 0.3972618257081652 | 0.6384539373142240 | T | T | T |
| 0.2142265862830105 | 0.3898076044847935 | 0.3325289993501543 | T | T | T |

3"

|                    |                     |                     |  |  |  |
|--------------------|---------------------|---------------------|--|--|--|
| 1.00000000000000   |                     |                     |  |  |  |
| 8.5086002349999994 | 0.0000000000000000  | 0.0000000000000000  |  |  |  |
| 0.0000000000000000 | 10.8548107146999993 | 0.0000000000000000  |  |  |  |
| 0.0000000000000000 | 0.0000000000000000  | 30.0000000000000000 |  |  |  |

Co H O  
24 44 62

Selective dynamics

Direct

|                    |                    |                    |   |   |   |
|--------------------|--------------------|--------------------|---|---|---|
| 0.5873745835876542 | 0.5497823848901392 | 0.4002074023051713 | T | T | T |
| 0.2438470969795877 | 0.5507093546410414 | 0.4003181646395365 | T | T | T |
| 0.5846385238680573 | 0.0500266209743724 | 0.4005070527383213 | T | T | T |
| 0.2516032688816391 | 0.0509833368877221 | 0.4006532418440204 | T | T | T |
| 0.9184187211109119 | 0.0490437765471618 | 0.4001187959772473 | T | T | T |
| 0.9093534254981682 | 0.5524061675451725 | 0.4000327283025519 | T | T | T |
| 0.0833333129999971 | 0.1817300920000022 | 0.4673556090000019 | F | F | F |
| 0.0833333129999971 | 0.6817300319999973 | 0.4673556090000019 | F | F | F |
| 0.4166666870000029 | 0.1817300920000022 | 0.4673556090000019 | F | F | F |
| 0.4166666870000029 | 0.6817300319999973 | 0.4673556090000019 | F | F | F |
| 0.7500000000000000 | 0.1817300920000022 | 0.4673556090000019 | F | F | F |
| 0.7500000000000000 | 0.6817300319999973 | 0.4673556090000019 | F | F | F |
| 0.2500000000000000 | 0.3182699680000027 | 0.5326443909999981 | F | F | F |
| 0.2500000000000000 | 0.8182699079999978 | 0.5326443909999981 | F | F | F |
| 0.5833333129999971 | 0.3182699680000027 | 0.5326443909999981 | F | F | F |
| 0.5833333129999971 | 0.8182699079999978 | 0.5326443909999981 | F | F | F |
| 0.9166666870000029 | 0.3182699680000027 | 0.5326443909999981 | F | F | F |
| 0.9166666870000029 | 0.8182699079999978 | 0.5326443909999981 | F | F | F |
| 0.0906465745018317 | 0.4475938324548277 | 0.5999672716974483 | T | T | T |
| 0.0815812788890879 | 0.9509562234528381 | 0.5998812040227527 | T | T | T |
| 0.7483967311183538 | 0.9490166631122778 | 0.5993467581559797 | T | T | T |
| 0.4153614761319429 | 0.9499733790256276 | 0.5994929472616786 | T | T | T |
| 0.7561529030204124 | 0.4492906453589656 | 0.5996818353604634 | T | T | T |
| 0.4126254164123458 | 0.4502176151098609 | 0.5997925976948287 | T | T | T |
| 0.4801130508754774 | 0.3731523813840167 | 0.3608353773337424 | T | T | T |
| 0.8267068336834840 | 0.3752943225946824 | 0.3592224070268728 | T | T | T |
| 0.7536250407068268 | 0.0473113784503279 | 0.3342822159578518 | T | T | T |
| 0.0743766198808950 | 0.5522095379699677 | 0.3345505124198372 | T | T | T |
| 0.1238575502947506 | 0.3751941359043454 | 0.3667592749659896 | T | T | T |
| 0.0267649176268412 | 0.8719079074592384 | 0.3621426742850762 | T | T | T |
| 0.4194164901313544 | 0.0514159761222341 | 0.3344614303170211 | T | T | T |
| 0.3608873505157556 | 0.8743988173451031 | 0.3633940948105954 | T | T | T |
| 0.0879502808186383 | 0.0496562244084233 | 0.3342771266308302 | T | T | T |
| 0.6716061137245687 | 0.8693983837769580 | 0.3573565725264638 | T | T | T |
| 0.2491326764761281 | 0.3095804769883433 | 0.3993790563747485 | T | T | T |
| 0.2472643377676870 | 0.8083976843836507 | 0.3996787626782779 | T | T | T |
| 0.5846405560298208 | 0.3052171513252441 | 0.3998901548891290 | T | T | T |
| 0.5821123111080931 | 0.8044902651720576 | 0.4004721415890951 | T | T | T |
| 0.9173598696797942 | 0.2912508996065653 | 0.4046272440455677 | T | T | T |
| 0.9146547039363433 | 0.8091238941985063 | 0.3989588472529129 | T | T | T |

|                    |                    |                    |       |
|--------------------|--------------------|--------------------|-------|
| 0.0833333129999971 | 0.4317300920000022 | 0.4673556090000019 | F F F |
| 0.0833333129999971 | 0.9317300920000022 | 0.4673556090000019 | F F F |
| 0.4166666870000029 | 0.4317300920000022 | 0.4673556090000019 | F F F |
| 0.4166666870000029 | 0.9317300920000022 | 0.4673556090000019 | F F F |
| 0.7500000000000000 | 0.4317300920000022 | 0.4673556090000019 | F F F |
| 0.7500000000000000 | 0.9317300920000022 | 0.4673556090000019 | F F F |
| 0.2500000000000000 | 0.0682699079999978 | 0.5326443909999981 | F F F |
| 0.2500000000000000 | 0.5682699079999978 | 0.5326443909999981 | F F F |
| 0.5833333129999971 | 0.0682699079999978 | 0.5326443909999981 | F F F |
| 0.5833333129999971 | 0.5682699079999978 | 0.5326443909999981 | F F F |
| 0.9166666870000029 | 0.0682699079999978 | 0.5326443909999981 | F F F |
| 0.9166666870000029 | 0.5682699079999978 | 0.5326443909999981 | F F F |
| 0.0853452960636566 | 0.1908761058014939 | 0.6010411527470872 | T T T |
| 0.0826401303202057 | 0.7087491003934347 | 0.5953727559544324 | T T T |
| 0.4178876888919070 | 0.1955097348279424 | 0.5995278584109048 | T T T |
| 0.4153594439701793 | 0.6947828486747559 | 0.6001098451108708 | T T T |
| 0.7527356622323058 | 0.1916023156163494 | 0.6003212373217222 | T T T |
| 0.7508673235238718 | 0.6904195230116567 | 0.6006209436252514 | T T T |
| 0.3283938862754312 | 0.1306016162230420 | 0.6426434274735363 | T T T |
| 0.9120497191813545 | 0.9503437755915767 | 0.6657228733691696 | T T T |
| 0.6391126494842444 | 0.1256011826548971 | 0.6366059051894047 | T T T |
| 0.5805835098686456 | 0.9485840238777660 | 0.6655385696829791 | T T T |
| 0.9732350823731589 | 0.1280920925407617 | 0.6378573257149238 | T T T |
| 0.8761424497052493 | 0.6248058640956546 | 0.6332407250340103 | T T T |
| 0.9256233801190978 | 0.4477904620300324 | 0.6654494875801629 | T T T |
| 0.2463749592931733 | 0.9526886215496719 | 0.6657177840421482 | T T T |
| 0.1732931663165162 | 0.6247056774053175 | 0.6407775929731271 | T T T |
| 0.5198869491245227 | 0.6268476186159830 | 0.6391646226662574 | T T T |
| 0.4159180997315207 | 0.6344728771786676 | 0.3222277386574128 | T T T |
| 0.4162788082183649 | 0.5889188265202870 | 0.3627367476580602 | T T T |
| 0.7535316718006249 | 0.5880899506136008 | 0.3643083745381376 | T T T |
| 0.2364096197139137 | 0.3850885290242720 | 0.3756046697298468 | T T T |
| 0.5819727638137795 | 0.3828790682120946 | 0.3758216664712357 | T T T |
| 0.7517357870172127 | 0.0972288886370550 | 0.3613814522688713 | T T T |
| 0.0770643432539749 | 0.6021867086608870 | 0.3616774319612567 | T T T |
| 0.4182399854236873 | 0.1002739616502258 | 0.3618240332257963 | T T T |
| 0.2534808980301888 | 0.8846249506082294 | 0.3755400089413447 | T T T |
| 0.0848186399820427 | 0.0988233083105687 | 0.3615540111676399 | T T T |
| 0.5785899928875549 | 0.8829896984060234 | 0.3759790895505016 | T T T |
| 0.9212768539505012 | 0.3864632017924211 | 0.3774628884824054 | T T T |
| 0.9214267803140064 | 0.8839953587106922 | 0.3751640432406668 | T T T |
| 0.2504874887146461 | 0.2090080314871678 | 0.4268972674087783 | T T T |
| 0.2489752042688897 | 0.7089215628045901 | 0.4266040953793234 | T T T |
| 0.5843361021592156 | 0.2081561066547815 | 0.4267883132226075 | T T T |
| 0.5836420408428953 | 0.7082638985994498 | 0.4265285474850357 | T T T |
| 0.9167495621503233 | 0.2080607491011723 | 0.4264806872579336 | T T T |
| 0.9153114724698901 | 0.7086457524438324 | 0.4269591644590933 | T T T |
| 0.0842145971776443 | 0.0197304927869712 | 0.4419239855172140 | T T T |
| 0.0803183344664203 | 0.5199301570473072 | 0.4415689089320953 | T T T |
| 0.4178298432207199 | 0.0198026785443245 | 0.4420102751218796 | T T T |
| 0.4139231029557884 | 0.5194443824076037 | 0.4412105366907049 | T T T |
| 0.7515258221688974 | 0.0193071369440552 | 0.4418492743134703 | T T T |
| 0.7487158985134326 | 0.5197897331767095 | 0.4424355316825810 | T T T |
| 0.0833333129999971 | 0.3437488080000008 | 0.4914442899999969 | F F F |
| 0.0833333129999971 | 0.8437487779999984 | 0.4914442899999969 | F F F |
| 0.4166666870000029 | 0.3437488080000008 | 0.4914442899999969 | F F F |
| 0.4166666870000029 | 0.8437487779999984 | 0.4914442899999969 | F F F |
| 0.7500000000000000 | 0.3437488080000008 | 0.4914442899999969 | F F F |
| 0.7500000000000000 | 0.8437487779999984 | 0.4914442899999969 | F F F |
| 0.2500000000000000 | 0.1562512220000016 | 0.5085557100000031 | F F F |
| 0.2500000000000000 | 0.6562511919999992 | 0.5085557100000031 | F F F |
| 0.5833333129999971 | 0.1562512220000016 | 0.5085557100000031 | F F F |
| 0.5833333129999971 | 0.6562511919999992 | 0.5085557100000031 | F F F |

|                    |                    |                    |   |   |   |
|--------------------|--------------------|--------------------|---|---|---|
| 0.9166666870000029 | 0.1562512220000016 | 0.5085557100000031 | F | F | F |
| 0.9166666870000029 | 0.6562511919999992 | 0.5085557100000031 | F | F | F |
| 0.2512841014865673 | 0.4802102668232905 | 0.5575644683174189 | T | T | T |
| 0.2484741778311027 | 0.9806928630559447 | 0.5581507256865295 | T | T | T |
| 0.5860768970442116 | 0.4805556175923965 | 0.5587894633092949 | T | T | T |
| 0.5821701567792802 | 0.9801973214556755 | 0.5579897248781202 | T | T | T |
| 0.9196816655335798 | 0.4800698429526929 | 0.5584310910679046 | T | T | T |
| 0.9157854028223557 | 0.9802695072130289 | 0.5580760144827861 | T | T | T |
| 0.0846885275301098 | 0.2913542475561675 | 0.5730408355409066 | T | T | T |
| 0.0832504378496767 | 0.7919392508988277 | 0.5735193127420665 | T | T | T |
| 0.4163579591571047 | 0.2917361014005502 | 0.5734714525149641 | T | T | T |
| 0.4156638978407843 | 0.7918438933452182 | 0.5732116876773926 | T | T | T |
| 0.7510247957311103 | 0.2910784371954100 | 0.5733959046206768 | T | T | T |
| 0.7495125112853469 | 0.7909919685128322 | 0.5731027325912218 | T | T | T |
| 0.0785732196859936 | 0.1160046412893079 | 0.6248359567593331 | T | T | T |
| 0.0787231460494988 | 0.6135367982075790 | 0.6225371115175945 | T | T | T |
| 0.4214100071124451 | 0.1170103015939767 | 0.6240209104494981 | T | T | T |
| 0.9151813600179570 | 0.9011766916894310 | 0.6384459888323601 | T | T | T |
| 0.7465191019698112 | 0.1153750493917707 | 0.6244599910586554 | T | T | T |
| 0.5817600145763127 | 0.8997260383497743 | 0.6381759667742035 | T | T | T |
| 0.9229356567460251 | 0.3978132913391130 | 0.6383225680387431 | T | T | T |
| 0.2482642129827872 | 0.9027711113629450 | 0.6386185477311288 | T | T | T |
| 0.4180272361862205 | 0.6171209317879053 | 0.6241783335287643 | T | T | T |
| 0.7635903802860934 | 0.6149114709757280 | 0.6243953302701533 | T | T | T |
| 0.2464683281993751 | 0.4119100493863992 | 0.6356916254618624 | T | T | T |
| 0.5837211917816351 | 0.4110811734797130 | 0.6372632523419397 | T | T | T |
| 0.5840819002684795 | 0.3655271228213324 | 0.6777722613425869 | T | T | T |

3'''

|                    |                     |                     |
|--------------------|---------------------|---------------------|
| 1.0000000000000000 |                     |                     |
| 8.5086002349999994 | 0.0000000000000000  | 0.0000000000000000  |
| 0.0000000000000000 | 10.8548107146999993 | 0.0000000000000000  |
| 0.0000000000000000 | 0.0000000000000000  | 30.0000000000000000 |

Co H O

24 44 62

Selective dynamics

Direct

|                    |                    |                    |   |   |   |
|--------------------|--------------------|--------------------|---|---|---|
| 0.5876842309966337 | 0.5508679152404183 | 0.4002773907533007 | T | T | T |
| 0.2463304715890918 | 0.5502097180540294 | 0.4003383145774046 | T | T | T |
| 0.5815897143294521 | 0.0490391698152006 | 0.4006950677723394 | T | T | T |
| 0.2482769115382106 | 0.0498063743058195 | 0.4009110917393890 | T | T | T |
| 0.9150176536077680 | 0.0491884852695483 | 0.4007257501175241 | T | T | T |
| 0.9170005840901403 | 0.5527258570935351 | 0.4001034414476099 | T | T | T |
| 0.0833333129999971 | 0.1817300920000022 | 0.4673556090000019 | F | F | F |
| 0.0833333129999971 | 0.6817300319999973 | 0.4673556090000019 | F | F | F |
| 0.4166666870000029 | 0.1817300920000022 | 0.4673556090000019 | F | F | F |
| 0.4166666870000029 | 0.6817300319999973 | 0.4673556090000019 | F | F | F |
| 0.7500000000000000 | 0.1817300920000022 | 0.4673556090000019 | F | F | F |
| 0.7500000000000000 | 0.6817300319999973 | 0.4673556090000019 | F | F | F |
| 0.2500000000000000 | 0.3182699680000027 | 0.5326443909999981 | F | F | F |
| 0.2500000000000000 | 0.8182699079999978 | 0.5326443909999981 | F | F | F |
| 0.5833333129999971 | 0.3182699680000027 | 0.5326443909999981 | F | F | F |
| 0.5833333129999971 | 0.8182699079999978 | 0.5326443909999981 | F | F | F |
| 0.9166666870000029 | 0.3182699680000027 | 0.5326443909999981 | F | F | F |
| 0.9166666870000029 | 0.8182699079999978 | 0.5326443909999981 | F | F | F |
| 0.0829994159098595 | 0.4472741429064648 | 0.5998965585523904 | T | T | T |
| 0.0849823463922319 | 0.9508115147304518 | 0.5992742498824760 | T | T | T |
| 0.7517230884617894 | 0.9501936256941879 | 0.5990889082606111 | T | T | T |
| 0.4184102856705483 | 0.9509608301847990 | 0.5993049322276602 | T | T | T |
| 0.7536695284109010 | 0.4497902819459706 | 0.5996616854225953 | T | T | T |
| 0.4123157690033661 | 0.4491320847595889 | 0.5997226092466995 | T | T | T |
| 0.7511247007414488 | 0.5554852536647487 | 0.3346440880964386 | T | T | T |
| 0.7290810989603519 | 0.3843899346645732 | 0.3689096614922985 | T | T | T |

|                    |                    |                    |   |   |   |
|--------------------|--------------------|--------------------|---|---|---|
| 0.7460662218581335 | 0.0475728714596088 | 0.3348100651214244 | T | T | T |
| 0.0828131764580258 | 0.5538999815496232 | 0.3347024571460811 | T | T | T |
| 0.1081404862379420 | 0.3820439712657878 | 0.3691145095134992 | T | T | T |
| 0.1354937086241542 | 0.8729240053315416 | 0.3636565620671271 | T | T | T |
| 0.4130888967298851 | 0.0505198308534535 | 0.3347445583569115 | T | T | T |
| 0.4799277384410414 | 0.8721154923388647 | 0.3601706138454953 | T | T | T |
| 0.0797182067011046 | 0.0521817059200655 | 0.3349132970730102 | T | T | T |
| 0.8244802284979460 | 0.8696335913759086 | 0.3596301041717262 | T | T | T |
| 0.2467637192869975 | 0.3155533038601218 | 0.3963771719968947 | T | T | T |
| 0.2513904767213642 | 0.8093659363426475 | 0.3990657298507124 | T | T | T |
| 0.5870407598873258 | 0.3192379534475809 | 0.3946561253567764 | T | T | T |
| 0.5840501675754460 | 0.8072803166637152 | 0.3996104869078640 | T | T | T |
| 0.9150900316744478 | 0.3283186464833103 | 0.3956805418185819 | T | T | T |
| 0.9195891938163037 | 0.8002459983931655 | 0.4029712281098339 | T | T | T |
| 0.0833333129999971 | 0.4317300920000022 | 0.4673556090000019 | F | F | F |
| 0.0833333129999971 | 0.9317300920000022 | 0.4673556090000019 | F | F | F |
| 0.4166666870000029 | 0.4317300920000022 | 0.4673556090000019 | F | F | F |
| 0.4166666870000029 | 0.9317300920000022 | 0.4673556090000019 | F | F | F |
| 0.7500000000000000 | 0.4317300920000022 | 0.4673556090000019 | F | F | F |
| 0.7500000000000000 | 0.9317300920000022 | 0.4673556090000019 | F | F | F |
| 0.2500000000000000 | 0.0682699079999978 | 0.5326443909999981 | F | F | F |
| 0.2500000000000000 | 0.5682699079999978 | 0.5326443909999981 | F | F | F |
| 0.5833333129999971 | 0.0682699079999978 | 0.5326443909999981 | F | F | F |
| 0.5833333129999971 | 0.5682699079999978 | 0.5326443909999981 | F | F | F |
| 0.9166666870000029 | 0.0682699079999978 | 0.5326443909999981 | F | F | F |
| 0.9166666870000029 | 0.5682699079999978 | 0.5326443909999981 | F | F | F |
| 0.0804108061837037 | 0.1997540016068344 | 0.5970287718901661 | T | T | T |
| 0.0849099683255524 | 0.6716813535166899 | 0.6043194581814182 | T | T | T |
| 0.4159498324245542 | 0.1927196833362844 | 0.6003895130921356 | T | T | T |
| 0.4129592401126810 | 0.6807620465524192 | 0.6053438746432307 | T | T | T |
| 0.7486095232786359 | 0.1906340636573452 | 0.6009342701492875 | T | T | T |
| 0.7532362807130025 | 0.6844466961398781 | 0.6036228280031053 | T | T | T |
| 0.1755197715020540 | 0.1303664086240917 | 0.6403698958282735 | T | T | T |
| 0.9202817932988955 | 0.9478182940799342 | 0.6650867029269903 | T | T | T |
| 0.5200722615589587 | 0.1278845076611352 | 0.6398293861545044 | T | T | T |
| 0.5869111032701150 | 0.9494801691465464 | 0.6652554416430956 | T | T | T |
| 0.8645062913758387 | 0.1270759946684588 | 0.6363434379328726 | T | T | T |
| 0.8918595137620438 | 0.6179560287342120 | 0.6308854904865011 | T | T | T |
| 0.9171868235419739 | 0.4461000184503765 | 0.6652975428539194 | T | T | T |
| 0.2539337781418735 | 0.9524271285403982 | 0.6651899348785755 | T | T | T |
| 0.2709189010396476 | 0.6156100653354267 | 0.6310903385077018 | T | T | T |
| 0.2488752992585583 | 0.4445147463352510 | 0.6653559119035615 | T | T | T |
| 0.4172909813657011 | 0.5762120705650745 | 0.3189921111687077 | T | T | T |
| 0.4169720009373285 | 0.5881542262603948 | 0.3625089394286071 | T | T | T |
| 0.7509955529499833 | 0.6052937352620983 | 0.3618339324524425 | T | T | T |
| 0.2262980589909838 | 0.3880536910314701 | 0.374389000015619  | T | T | T |
| 0.6089617040124000 | 0.3899875834605176 | 0.3733048985626854 | T | T | T |
| 0.7482821713287522 | 0.0968965462737817 | 0.3620752267183316 | T | T | T |
| 0.0831753957249167 | 0.6041497900348721 | 0.3617846296405320 | T | T | T |
| 0.4154247341942463 | 0.0982758845863676 | 0.3623751781465409 | T | T | T |
| 0.2439767597108976 | 0.8839418715698537 | 0.3751658119363803 | T | T | T |
| 0.0812898386870882 | 0.0997892192424660 | 0.3625893003013858 | T | T | T |
| 0.5807356644992078 | 0.8839486948003269 | 0.3756116648683361 | T | T | T |
| 0.9150877833374573 | 0.3953142785259068 | 0.3727702708179302 | T | T | T |
| 0.9208067071608298 | 0.8842457409606733 | 0.3768118909999912 | T | T | T |
| 0.2506451712294269 | 0.2076787268470264 | 0.4270918240135383 | T | T | T |
| 0.2514042367267532 | 0.7084923588944120 | 0.4269020885774352 | T | T | T |
| 0.5858636674456754 | 0.2064064063533499 | 0.4274369297712649 | T | T | T |
| 0.5826378037887989 | 0.7088770323342930 | 0.4268673261859929 | T | T | T |
| 0.9122369418559633 | 0.2060519150383635 | 0.4279723687410694 | T | T | T |
| 0.9175180398127616 | 0.7115565806136314 | 0.4273154971944437 | T | T | T |
| 0.0817992422618793 | 0.0189799896123599 | 0.4424868898632174 | T | T | T |
| 0.0821538519862683 | 0.5206861630017576 | 0.4421465919537097 | T | T | T |

|                    |                    |                    |   |   |   |
|--------------------|--------------------|--------------------|---|---|---|
| 0.4158111083210900 | 0.0185927984837852 | 0.4424161474240270 | T | T | T |
| 0.4171448519912104 | 0.5188459488975061 | 0.4414491371915181 | T | T | T |
| 0.7483941348316779 | 0.0200674016524087 | 0.4423868616693838 | T | T | T |
| 0.7515640243027163 | 0.5200942611213147 | 0.4422822312096302 | T | T | T |
| 0.0833333129999971 | 0.3437488080000008 | 0.4914442899999969 | F | F | F |
| 0.0833333129999971 | 0.8437487779999984 | 0.4914442899999969 | F | F | F |
| 0.4166666870000029 | 0.3437488080000008 | 0.4914442899999969 | F | F | F |
| 0.4166666870000029 | 0.8437487779999984 | 0.4914442899999969 | F | F | F |
| 0.7500000000000000 | 0.3437488080000008 | 0.4914442899999969 | F | F | F |
| 0.7500000000000000 | 0.8437487779999984 | 0.4914442899999969 | F | F | F |
| 0.2500000000000000 | 0.1562512220000016 | 0.5085557100000031 | F | F | F |
| 0.2500000000000000 | 0.6562511919999992 | 0.5085557100000031 | F | F | F |
| 0.5833333129999971 | 0.1562512220000016 | 0.5085557100000031 | F | F | F |
| 0.5833333129999971 | 0.6562511919999992 | 0.5085557100000031 | F | F | F |
| 0.9166666870000029 | 0.1562512220000016 | 0.5085557100000031 | F | F | F |
| 0.9166666870000029 | 0.6562511919999992 | 0.5085557100000031 | F | F | F |
| 0.2484359756972838 | 0.4799057388786852 | 0.5577177687903700 | T | T | T |
| 0.2516058651683218 | 0.9799325983475983 | 0.5576131383306233 | T | T | T |
| 0.5828551480087897 | 0.4811540511024941 | 0.5585508628084751 | T | T | T |
| 0.5841888916789101 | 0.9814072015162147 | 0.5575838525759728 | T | T | T |
| 0.9178461480137390 | 0.4793138369982421 | 0.5578534080462901 | T | T | T |
| 0.9182007577381210 | 0.9810200103876403 | 0.5575131101367828 | T | T | T |
| 0.0824819601872386 | 0.2884434193863687 | 0.5726845028055563 | T | T | T |
| 0.0877630581440438 | 0.7939480849616358 | 0.5720276312589376 | T | T | T |
| 0.4173621962112012 | 0.2911229676657069 | 0.5731326738140141 | T | T | T |
| 0.4141363325543241 | 0.7935935936466501 | 0.5725630702287353 | T | T | T |
| 0.7485957632732467 | 0.2915076411055882 | 0.5730979114225646 | T | T | T |
| 0.7493548287705730 | 0.7923212731529664 | 0.5729081759864616 | T | T | T |
| 0.0791932928391700 | 0.1157542590393267 | 0.6231881090000093 | T | T | T |
| 0.0849122166625427 | 0.6046857214740929 | 0.6272297291820698 | T | T | T |
| 0.4192643355007923 | 0.1160513051996731 | 0.6243883351316639 | T | T | T |
| 0.9187101613129118 | 0.9002107807575341 | 0.6374106996986144 | T | T | T |
| 0.7560232402891027 | 0.1160581284301461 | 0.6248341880636197 | T | T | T |
| 0.5845752658057537 | 0.9017241154136321 | 0.6376248218534589 | T | T | T |
| 0.9168246042750831 | 0.3958502099651278 | 0.6382153703594683 | T | T | T |
| 0.2517178286712481 | 0.9031034537262184 | 0.6379247732816681 | T | T | T |
| 0.3910382959875996 | 0.6100124165394827 | 0.6266951014373146 | T | T | T |
| 0.7737019410090163 | 0.6119463089685300 | 0.6256109999984379 | T | T | T |
| 0.2490044470500168 | 0.3947062647379091 | 0.6381660675475503 | T | T | T |
| 0.5830279990626644 | 0.4118457737396123 | 0.6374910605713929 | T | T | T |
| 0.5827090186342987 | 0.4237879294349254 | 0.6810078888312922 | T | T | T |

4

|                    |                     |                     |  |  |  |
|--------------------|---------------------|---------------------|--|--|--|
| 1.0000000000000000 |                     |                     |  |  |  |
| 8.5086002349999994 | 0.0000000000000000  | 0.0000000000000000  |  |  |  |
| 0.0000000000000000 | 10.8548107146999993 | 0.0000000000000000  |  |  |  |
| 0.0000000000000000 | 0.0000000000000000  | 30.0000000000000000 |  |  |  |

Co H O

24 44 58

Selective dynamics

Direct

|                    |                    |                    |   |   |   |
|--------------------|--------------------|--------------------|---|---|---|
| 0.2544807596463272 | 0.5522462300957116 | 0.3991969384385641 | T | T | T |
| 0.5804284746088584 | 0.5462823520414588 | 0.3995709860502856 | T | T | T |
| 0.5847855443809209 | 0.0478028911189767 | 0.4006359473579835 | T | T | T |
| 0.2521041248625551 | 0.0468874097362502 | 0.3994825768713497 | T | T | T |
| 0.9188948621994442 | 0.0472994053536908 | 0.4003350961294174 | T | T | T |
| 0.9162517297346113 | 0.5489200708439270 | 0.3998768429776547 | T | T | T |
| 0.0833333129999971 | 0.1817300920000022 | 0.4673556090000019 | F | F | F |
| 0.0833333129999971 | 0.6817300319999973 | 0.4673556090000019 | F | F | F |
| 0.4166666870000029 | 0.1817300920000022 | 0.4673556090000019 | F | F | F |
| 0.4166666870000029 | 0.6817300319999973 | 0.4673556090000019 | F | F | F |
| 0.7500000000000000 | 0.1817300920000022 | 0.4673556090000019 | F | F | F |
| 0.7500000000000000 | 0.6817300319999973 | 0.4673556090000019 | F | F | F |

|                    |                    |                    |       |
|--------------------|--------------------|--------------------|-------|
| 0.2500000000000000 | 0.3182699680000027 | 0.5326443909999981 | F F F |
| 0.2500000000000000 | 0.8182699079999978 | 0.5326443909999981 | F F F |
| 0.5833333129999971 | 0.3182699680000027 | 0.5326443909999981 | F F F |
| 0.5833333129999971 | 0.8182699079999978 | 0.5326443909999981 | F F F |
| 0.9166666870000029 | 0.3182699680000027 | 0.5326443909999981 | F F F |
| 0.9166666870000029 | 0.8182699079999978 | 0.5326443909999981 | F F F |
| 0.0837482702653887 | 0.4510799291560730 | 0.6001231570223453 | T T T |
| 0.0811051378005629 | 0.9527005946463092 | 0.5996649038705826 | T T T |
| 0.7478958751374449 | 0.9531125902637498 | 0.6005174231286503 | T T T |
| 0.4152144556190791 | 0.9521971088810162 | 0.5993640526420165 | T T T |
| 0.4195715253911416 | 0.4537176479585412 | 0.6004290139497144 | T T T |
| 0.7455192403536728 | 0.4477537699042884 | 0.6008030615614359 | T T T |
| 0.7490082271835448 | 0.5460403609379796 | 0.3342034013819983 | T T T |
| 0.7154770792315830 | 0.3747247054286049 | 0.3700306979451895 | T T T |
| 0.7540540538015961 | 0.0386453683095667 | 0.3353802496334666 | T T T |
| 0.0835967210615678 | 0.5418654095371807 | 0.3323035389335232 | T T T |
| 0.9761031343008497 | 0.3665955960038829 | 0.3517118549776939 | T T T |
| 0.0366591616432999 | 0.8718881580715774 | 0.3660330986986366 | T T T |
| 0.4217774850150420 | 0.0410719213467985 | 0.3350038724763778 | T T T |
| 0.3587608946796834 | 0.8724366175925411 | 0.3646048282091741 | T T T |
| 0.0863343232349223 | 0.0437478834034977 | 0.3343128788877507 | T T T |
| 0.6765639026685761 | 0.8669802401697311 | 0.3603237307097373 | T T T |
| 0.2514977201050996 | 0.2767867723402873 | 0.4045539740300583 | T T T |
| 0.2473950306458974 | 0.7982648660347138 | 0.4067889387235439 | T T T |
| 0.5817309034380429 | 0.3097708092709510 | 0.3981148557234349 | T T T |
| 0.5789972011482760 | 0.7924936491982848 | 0.4036892485441186 | T T T |
| 0.9167951189299544 | 0.2913134205738217 | 0.4032372241598097 | T T T |
| 0.9157782843519655 | 0.8038528978510939 | 0.4005223910247651 | T T T |
| 0.0833333129999971 | 0.4317300920000022 | 0.4673556090000019 | F F F |
| 0.0833333129999971 | 0.9317300920000022 | 0.4673556090000019 | F F F |
| 0.4166666870000029 | 0.4317300920000022 | 0.4673556090000019 | F F F |
| 0.4166666870000029 | 0.9317300920000022 | 0.4673556090000019 | F F F |
| 0.7500000000000000 | 0.4317300920000022 | 0.4673556090000019 | F F F |
| 0.7500000000000000 | 0.9317300920000022 | 0.4673556090000019 | F F F |
| 0.2500000000000000 | 0.0682699079999978 | 0.5326443909999981 | F F F |
| 0.2500000000000000 | 0.5682699079999978 | 0.5326443909999981 | F F F |
| 0.5833333129999971 | 0.0682699079999978 | 0.5326443909999981 | F F F |
| 0.5833333129999971 | 0.5682699079999978 | 0.5326443909999981 | F F F |
| 0.9166666870000029 | 0.0682699079999978 | 0.5326443909999981 | F F F |
| 0.9166666870000029 | 0.5682699079999978 | 0.5326443909999981 | F F F |
| 0.0842217156480345 | 0.1961471021489061 | 0.5994776089752349 | T T T |
| 0.0832048810700456 | 0.7086865794261783 | 0.5967627758401903 | T T T |
| 0.4210027988517240 | 0.2075063508017152 | 0.5963107514558814 | T T T |
| 0.4182690965619571 | 0.6902291907290490 | 0.6018851442765651 | T T T |
| 0.7526049693541026 | 0.2017351339652933 | 0.5932110612764561 | T T T |
| 0.7485022798949004 | 0.7232132276597127 | 0.5954460259699417 | T T T |
| 0.3234360973314310 | 0.1330197598302689 | 0.6396762692902627 | T T T |
| 0.9136656767650777 | 0.9562521165965023 | 0.6656871211122493 | T T T |
| 0.6412391053203166 | 0.1275633824074589 | 0.6353951717908259 | T T T |
| 0.5782225149849580 | 0.9589280786532015 | 0.6649961275236222 | T T T |
| 0.9633408383567001 | 0.1281118419284226 | 0.6339669013013634 | T T T |
| 0.0238968656991503 | 0.6334044039961171 | 0.6482881450223061 | T T T |
| 0.9164032789384322 | 0.4581345904628193 | 0.6676964610664768 | T T T |
| 0.2459459461984039 | 0.9613546316904333 | 0.6646197503665334 | T T T |
| 0.2845229207684170 | 0.6252752945713951 | 0.6299693020548105 | T T T |
| 0.2509917728164552 | 0.4539596390620204 | 0.6657965986180017 | T T T |
| 0.4088799512720627 | 0.5719748117651022 | 0.3616113043323423 | T T T |
| 0.7477472762633397 | 0.5976053971309057 | 0.3608889410337284 | T T T |
| 0.5988497747091515 | 0.3820266548022673 | 0.3750376651261078 | T T T |
| 0.7522030169266429 | 0.0932882887249988 | 0.3612702253790658 | T T T |
| 0.0834458778157128 | 0.5914829216619779 | 0.3594198434004099 | T T T |
| 0.4183103023724044 | 0.0953620019053147 | 0.3609918005940358 | T T T |
| 0.2507398099604714 | 0.8870519476690077 | 0.3755635048289250 | T T T |



|                    |                    |                    |       |
|--------------------|--------------------|--------------------|-------|
| 0.0850346208541808 | 0.0959206166795212 | 0.3608727606151447 | T T T |
| 0.5786674717684193 | 0.8824939097225268 | 0.3765569717008077 | T T T |
| 0.9077616736336367 | 0.3821444677848760 | 0.3771574524316108 | T T T |
| 0.9263812299939076 | 0.8825636571323443 | 0.3760442213499928 | T T T |
| 0.2501259170799059 | 0.2088487695708636 | 0.4257566360454064 | T T T |
| 0.2499245838422866 | 0.7176672308051693 | 0.4284079359568267 | T T T |
| 0.5825883101767673 | 0.2063670709941334 | 0.4270875732793087 | T T T |
| 0.5812479660446996 | 0.7070940202442912 | 0.4263130574748573 | T T T |
| 0.9171062661141036 | 0.2071835892074887 | 0.4264836023642076 | T T T |
| 0.9164145668408423 | 0.7078587906701372 | 0.4265319837690029 | T T T |
| 0.0856032972101630 | 0.0195275483152457 | 0.4419118911244055 | T T T |
| 0.0848688933090571 | 0.5181205967014435 | 0.4410552235804772 | T T T |
| 0.4166094486142384 | 0.0192578599492066 | 0.4419239003875362 | T T T |
| 0.4163320517847353 | 0.5188732746091134 | 0.4423714917160737 | T T T |
| 0.7518913813455299 | 0.0189221741944507 | 0.4420479670972526 | T T T |
| 0.7515334507901912 | 0.5201906829663017 | 0.4420842790779602 | T T T |
| 0.0833333129999971 | 0.3437488080000008 | 0.4914442899999969 | F F F |
| 0.0833333129999971 | 0.8437487779999984 | 0.4914442899999969 | F F F |
| 0.4166666870000029 | 0.3437488080000008 | 0.4914442899999969 | F F F |
| 0.4166666870000029 | 0.8437487779999984 | 0.4914442899999969 | F F F |
| 0.7500000000000000 | 0.3437488080000008 | 0.4914442899999969 | F F F |
| 0.7500000000000000 | 0.8437487779999984 | 0.4914442899999969 | F F F |
| 0.2500000000000000 | 0.1562512220000016 | 0.5085557100000031 | F F F |
| 0.2500000000000000 | 0.6562511919999992 | 0.5085557100000031 | F F F |
| 0.5833333129999971 | 0.1562512220000016 | 0.5085557100000031 | F F F |
| 0.5833333129999971 | 0.6562511919999992 | 0.5085557100000031 | F F F |
| 0.9166666870000029 | 0.1562512220000016 | 0.5085557100000031 | F F F |
| 0.9166666870000029 | 0.6562511919999992 | 0.5085557100000031 | F F F |
| 0.2484665492098088 | 0.4798093170336983 | 0.5579157209220398 | T T T |
| 0.2481086186544701 | 0.9810778258055493 | 0.5579520329027474 | T T T |
| 0.5836679482152647 | 0.4811267253908866 | 0.5576285082839263 | T T T |
| 0.5833905513857616 | 0.9807421400507934 | 0.5580760996124638 | T T T |
| 0.9151311066909429 | 0.4818794032985565 | 0.5589447764195228 | T T T |
| 0.9143967027898370 | 0.9804724516847614 | 0.5580881088755945 | T T T |
| 0.0835854331591577 | 0.2921412093298699 | 0.5734680162309971 | T T T |
| 0.0828937338858964 | 0.7928164107925113 | 0.5735163976357924 | T T T |
| 0.4187520339553004 | 0.2929059797557088 | 0.5736869425251427 | T T T |
| 0.4174116898232327 | 0.7936329290058666 | 0.5729124267206913 | T T T |
| 0.7500754161577134 | 0.2823327691948307 | 0.5715920640431733 | T T T |
| 0.7498740829200941 | 0.7911512304291364 | 0.5742433639545936 | T T T |
| 0.0736187700060924 | 0.1174363428676557 | 0.6239557786500072 | T T T |
| 0.0922383263663633 | 0.6178555322151240 | 0.6228425475683892 | T T T |
| 0.4213325282315807 | 0.1175060902774732 | 0.6234430282991923 | T T T |
| 0.9149653791458192 | 0.9040793833204788 | 0.6391272393848553 | T T T |
| 0.7492601900395286 | 0.1129480523309923 | 0.6244364951710750 | T T T |
| 0.5816896976275956 | 0.9046379980946853 | 0.6390081994059642 | T T T |
| 0.9165541221842872 | 0.4085170783380221 | 0.6405801565995901 | T T T |
| 0.2477969830733571 | 0.9067117112750012 | 0.6387297746209342 | T T T |
| 0.4011502252908485 | 0.6179733451977327 | 0.6249623348738922 | T T T |
| 0.2522527237366603 | 0.4023946028690943 | 0.6391110589662716 | T T T |
| 0.5911200487279373 | 0.4280251882348978 | 0.6383886956676577 | T T T |

4'

|                    |                     |                     |
|--------------------|---------------------|---------------------|
| 1.0000000000000000 |                     |                     |
| 8.5086002349999994 | 0.0000000000000000  | 0.0000000000000000  |
| 0.0000000000000000 | 10.8548107146999993 | 0.0000000000000000  |
| 0.0000000000000000 | 0.0000000000000000  | 30.0000000000000000 |

Co H O

24 44 58

Selective dynamics

Direct

|                    |                    |                    |       |
|--------------------|--------------------|--------------------|-------|
| 0.2515579976136489 | 0.5523695702975450 | 0.3995225590743334 | T T T |
| 0.5815534749822719 | 0.5470591105682361 | 0.3996376524176837 | T T T |

|                    |                    |                    |   |   |   |
|--------------------|--------------------|--------------------|---|---|---|
| 0.5846639061508085 | 0.0488364890375849 | 0.4008407016614666 | T | T | T |
| 0.2522623004624014 | 0.0472863964517238 | 0.3997766681417418 | T | T | T |
| 0.9187201178646917 | 0.0480956678342138 | 0.4007321831068122 | T | T | T |
| 0.9158963112654565 | 0.5458364859791064 | 0.4004112880013213 | T | T | T |
| 0.0833333129999971 | 0.1817300920000022 | 0.4673556090000019 | F | F | F |
| 0.0833333129999971 | 0.6817300319999973 | 0.4673556090000019 | F | F | F |
| 0.4166666870000029 | 0.1817300920000022 | 0.4673556090000019 | F | F | F |
| 0.4166666870000029 | 0.6817300319999973 | 0.4673556090000019 | F | F | F |
| 0.7500000000000000 | 0.1817300920000022 | 0.4673556090000019 | F | F | F |
| 0.7500000000000000 | 0.6817300319999973 | 0.4673556090000019 | F | F | F |
| 0.2500000000000000 | 0.3182699680000027 | 0.5326443909999981 | F | F | F |
| 0.2500000000000000 | 0.8182699079999978 | 0.5326443909999981 | F | F | F |
| 0.5833333129999971 | 0.3182699680000027 | 0.5326443909999981 | F | F | F |
| 0.5833333129999971 | 0.8182699079999978 | 0.5326443909999981 | F | F | F |
| 0.9166666870000029 | 0.3182699680000027 | 0.5326443909999981 | F | F | F |
| 0.9166666870000029 | 0.8182699079999978 | 0.5326443909999981 | F | F | F |
| 0.0841036887345435 | 0.4541635140208938 | 0.5995887119986785 | T | T | T |
| 0.0812798821353083 | 0.9519043321657865 | 0.5992678168931876 | T | T | T |
| 0.7477376995375984 | 0.9527136035482763 | 0.6002233318582584 | T | T | T |
| 0.4153360938491912 | 0.9511635109624154 | 0.5991592983385337 | T | T | T |
| 0.4184465250177283 | 0.4529408894317638 | 0.6003623475823163 | T | T | T |
| 0.7484420023863513 | 0.4476304297024549 | 0.6004774409256665 | T | T | T |
| 0.4263089922121806 | 0.5070073736267675 | 0.3419948555940313 | T | T | T |
| 0.7415944210333322 | 0.4999824071510802 | 0.3443252829697968 | T | T | T |
| 0.7555721328679808 | 0.0346566356720946 | 0.3362571056395091 | T | T | T |
| 0.0872284393059815 | 0.5456588814259137 | 0.3315819707907006 | T | T | T |
| 0.0130829339286909 | 0.3654360791010245 | 0.3583023955186778 | T | T | T |
| 0.0403581757352259 | 0.8729641241365317 | 0.3663626407501694 | T | T | T |
| 0.4216926785281843 | 0.0412321637924707 | 0.3353008966367043 | T | T | T |
| 0.3635364637662999 | 0.8737624678728101 | 0.3660732811962740 | T | T | T |
| 0.0855879579957211 | 0.0463171196932114 | 0.3343007534208132 | T | T | T |
| 0.6647499001979115 | 0.8666606655520026 | 0.3573603962899934 | T | T | T |
| 0.2603511786230376 | 0.2756832250110652 | 0.4040265145847410 | T | T | T |
| 0.2479400781333750 | 0.8016056226990574 | 0.4055137641502539 | T | T | T |
| 0.5793532243026041 | 0.3260149591277334 | 0.3921017338956290 | T | T | T |
| 0.5803642408109021 | 0.7935561847729686 | 0.4042422863786935 | T | T | T |
| 0.9141789498334030 | 0.3017943150055716 | 0.4000535032309089 | T | T | T |
| 0.9155109317583677 | 0.8064529810245674 | 0.3989163566669798 | T | T | T |
| 0.0833333129999971 | 0.4317300920000022 | 0.4673556090000019 | F | F | F |
| 0.0833333129999971 | 0.9317300920000022 | 0.4673556090000019 | F | F | F |
| 0.4166666870000029 | 0.4317300920000022 | 0.4673556090000019 | F | F | F |
| 0.4166666870000029 | 0.9317300920000022 | 0.4673556090000019 | F | F | F |
| 0.7500000000000000 | 0.4317300920000022 | 0.4673556090000019 | F | F | F |
| 0.7500000000000000 | 0.9317300920000022 | 0.4673556090000019 | F | F | F |
| 0.2500000000000000 | 0.0682699079999978 | 0.5326443909999981 | F | F | F |
| 0.2500000000000000 | 0.5682699079999978 | 0.5326443909999981 | F | F | F |
| 0.5833333129999971 | 0.0682699079999978 | 0.5326443909999981 | F | F | F |
| 0.5833333129999971 | 0.5682699079999978 | 0.5326443909999981 | F | F | F |
| 0.9166666870000029 | 0.0682699079999978 | 0.5326443909999981 | F | F | F |
| 0.9166666870000029 | 0.5682699079999978 | 0.5326443909999981 | F | F | F |
| 0.0844890682416321 | 0.1935470189754326 | 0.6010836433330203 | T | T | T |
| 0.0858210501665969 | 0.6982056849944287 | 0.5999464967690911 | T | T | T |
| 0.4196357591890980 | 0.2064438152270316 | 0.5957577136213066 | T | T | T |
| 0.4206467756973958 | 0.6739850408722665 | 0.6078982661043707 | T | T | T |
| 0.7520599218666252 | 0.1983943773009427 | 0.5944862358497462 | T | T | T |
| 0.7396488213769624 | 0.7243167749889349 | 0.5959734854152589 | T | T | T |
| 0.3352500998020888 | 0.1333393344479975 | 0.6426396037100068 | T | T | T |
| 0.9144120420042789 | 0.9536828803067885 | 0.6656992465791868 | T | T | T |
| 0.6364635362337000 | 0.1262375321271897 | 0.6339267188037260 | T | T | T |
| 0.5783073214718156 | 0.9587678362075295 | 0.6646991033632955 | T | T | T |
| 0.9596418242647742 | 0.1270358758634682 | 0.6336373592498307 | T | T | T |
| 0.9869170660713091 | 0.6345639208989754 | 0.6416976044813221 | T | T | T |
| 0.9127715606940185 | 0.4543411185740864 | 0.6684180292092997 | T | T | T |

|                    |                    |                    |   |   |   |
|--------------------|--------------------|--------------------|---|---|---|
| 0.2444278671320192 | 0.9653433643279056 | 0.6637428943604908 | T | T | T |
| 0.2584055789666678 | 0.5000175928489198 | 0.6556747170302034 | T | T | T |
| 0.5736910077878196 | 0.4929926263732325 | 0.6580051444059687 | T | T | T |
| 0.4122756660916501 | 0.5857628252809037 | 0.3582160256755991 | T | T | T |
| 0.7501885734049714 | 0.5805937552726684 | 0.3594678468140547 | T | T | T |
| 0.5613622652349092 | 0.3961652747291278 | 0.3711975671959188 | T | T | T |
| 0.7524467732378187 | 0.0922755775656830 | 0.3612649095554027 | T | T | T |
| 0.0861404802519236 | 0.5865965667663390 | 0.3605834261359345 | T | T | T |
| 0.4177019061549931 | 0.0961901605882339 | 0.3610874515646013 | T | T | T |
| 0.2531488077046881 | 0.8860517267172017 | 0.3761409642848368 | T | T | T |
| 0.0853321104627753 | 0.0970871431105245 | 0.3611957236046964 | T | T | T |
| 0.5737639255471210 | 0.8826658764782459 | 0.3763498715006594 | T | T | T |
| 0.9202071408776435 | 0.3805092261271392 | 0.3764989178329013 | T | T | T |
| 0.9288768049215536 | 0.8824978768841178 | 0.3753573782654284 | T | T | T |
| 0.2512747799582169 | 0.2090576343252361 | 0.4256208965623478 | T | T | T |
| 0.2490787660381065 | 0.7176240652142998 | 0.4282218541763218 | T | T | T |
| 0.5838803652792087 | 0.2066612335659935 | 0.4271018820405323 | T | T | T |
| 0.5834467302540199 | 0.7090187110968794 | 0.4267013900410918 | T | T | T |
| 0.9163704380185749 | 0.2065055839675833 | 0.4268029833573133 | T | T | T |
| 0.9150762169733839 | 0.7060050762552464 | 0.4261874467645194 | T | T | T |
| 0.0860117454132922 | 0.0197519661745723 | 0.4420845781047760 | T | T | T |
| 0.0867643763799616 | 0.5199928596661690 | 0.4417279425944269 | T | T | T |
| 0.4165288261496455 | 0.0196226572338246 | 0.4421091222775631 | T | T | T |
| 0.4130067796841316 | 0.5195888398020426 | 0.4413350506720754 | T | T | T |
| 0.7516163192910947 | 0.0187111382408143 | 0.4421641766032131 | T | T | T |
| 0.7490421460585862 | 0.5186575723245890 | 0.4417122709160065 | T | T | T |
| 0.0833333129999971 | 0.3437488080000008 | 0.4914442899999969 | F | F | F |
| 0.0833333129999971 | 0.8437487779999984 | 0.4914442899999969 | F | F | F |
| 0.4166666870000029 | 0.3437488080000008 | 0.4914442899999969 | F | F | F |
| 0.4166666870000029 | 0.8437487779999984 | 0.4914442899999969 | F | F | F |
| 0.7500000000000000 | 0.3437488080000008 | 0.4914442899999969 | F | F | F |
| 0.7500000000000000 | 0.8437487779999984 | 0.4914442899999969 | F | F | F |
| 0.2500000000000000 | 0.1562512220000016 | 0.5085557100000031 | F | F | F |
| 0.2500000000000000 | 0.6562511919999992 | 0.5085557100000031 | F | F | F |
| 0.5833333129999971 | 0.1562512220000016 | 0.5085557100000031 | F | F | F |
| 0.5833333129999971 | 0.6562511919999992 | 0.5085557100000031 | F | F | F |
| 0.9166666870000029 | 0.1562512220000016 | 0.5085557100000031 | F | F | F |
| 0.9166666870000029 | 0.6562511919999992 | 0.5085557100000031 | F | F | F |
| 0.2509578539414140 | 0.4813424276754111 | 0.5582877290839937 | T | T | T |
| 0.2483836807089053 | 0.9812888617591855 | 0.5578358233967867 | T | T | T |
| 0.5869932203158682 | 0.4804111601979574 | 0.5586649493279247 | T | T | T |
| 0.5834711738503545 | 0.9803773427661754 | 0.5578908777224367 | T | T | T |
| 0.9132356236200454 | 0.4800071403338312 | 0.5582720574055799 | T | T | T |
| 0.9139882545867077 | 0.9802480338254275 | 0.5579154218952239 | T | T | T |
| 0.0849237830266160 | 0.2939949237447537 | 0.5738125532354809 | T | T | T |
| 0.0836295619814252 | 0.7934944160324165 | 0.5731970166426864 | T | T | T |
| 0.4165532697459798 | 0.2909812889031204 | 0.5732986099589080 | T | T | T |
| 0.4161196347207912 | 0.7933387664340066 | 0.5728981179594679 | T | T | T |
| 0.7509212339618936 | 0.2823759347857001 | 0.5717781458236781 | T | T | T |
| 0.7487252200417825 | 0.7909423656747641 | 0.5743791034376524 | T | T | T |
| 0.0711231950784465 | 0.1175021231158824 | 0.6246426217345719 | T | T | T |
| 0.0797928591223566 | 0.6194907738728607 | 0.6235010821670985 | T | T | T |
| 0.4262360744528790 | 0.1173341235217541 | 0.6236501284993405 | T | T | T |
| 0.9146678895372247 | 0.9029128568894756 | 0.6388042763953037 | T | T | T |
| 0.7468511922953119 | 0.1139482732827983 | 0.6238590357151634 | T | T | T |
| 0.5822980938450069 | 0.9038098394117661 | 0.6389125484353986 | T | T | T |
| 0.9138595197480767 | 0.4134034332336609 | 0.6394165738640657 | T | T | T |
| 0.2475532267621811 | 0.9077244224343100 | 0.6387350904445972 | T | T | T |
| 0.4386377347650907 | 0.6038347252708723 | 0.6288024328040811 | T | T | T |
| 0.2498114265950288 | 0.4194062447273318 | 0.6405321531859453 | T | T | T |
| 0.5877243339083499 | 0.4142371747190963 | 0.6417839743244012 | T | T | T |

1.00000000000000  
8.5086002349999994 0.000000000000000 0.000000000000000  
0.0000000000000000 10.8548107146999993 0.0000000000000000  
0.0000000000000000 0.0000000000000000 30.0000000000000000

Co H O  
24 44 58

Selective dynamics

Direct

|                    |                    |                    |   |   |   |
|--------------------|--------------------|--------------------|---|---|---|
| 0.2402989933910149 | 0.5467687703850288 | 0.4017809229541101 | T | T | T |
| 0.5864370960253638 | 0.5469663425921780 | 0.3984576430872764 | T | T | T |
| 0.5851946978933782 | 0.0508088501042963 | 0.4008212421203581 | T | T | T |
| 0.2522002441021129 | 0.0479326050520896 | 0.4001131248638501 | T | T | T |
| 0.9176244055478904 | 0.0491583274893657 | 0.4003683934064100 | T | T | T |
| 0.9102873247375811 | 0.5490122364338532 | 0.4005056250239321 | T | T | T |
| 0.0833333129999971 | 0.1817300920000022 | 0.4673556090000019 | F | F | F |
| 0.0833333129999971 | 0.6817300319999973 | 0.4673556090000019 | F | F | F |
| 0.4166666870000029 | 0.1817300920000022 | 0.4673556090000019 | F | F | F |
| 0.4166666870000029 | 0.6817300319999973 | 0.4673556090000019 | F | F | F |
| 0.7500000000000000 | 0.1817300920000022 | 0.4673556090000019 | F | F | F |
| 0.7500000000000000 | 0.6817300319999973 | 0.4673556090000019 | F | F | F |
| 0.2500000000000000 | 0.3182699680000027 | 0.5326443909999981 | F | F | F |
| 0.2500000000000000 | 0.8182699079999978 | 0.5326443909999981 | F | F | F |
| 0.5833333129999971 | 0.3182699680000027 | 0.5326443909999981 | F | F | F |
| 0.5833333129999971 | 0.8182699079999978 | 0.5326443909999981 | F | F | F |
| 0.9166666870000029 | 0.3182699680000027 | 0.5326443909999981 | F | F | F |
| 0.9166666870000029 | 0.8182699079999978 | 0.5326443909999981 | F | F | F |
| 0.0897126752624189 | 0.4509877635661468 | 0.5994943749760679 | T | T | T |
| 0.0823755944521096 | 0.9508416725106343 | 0.5996316065935900 | T | T | T |
| 0.7477997558978871 | 0.9520673949479104 | 0.5998868751361499 | T | T | T |
| 0.4148053021066218 | 0.9491911498957037 | 0.5991787578796419 | T | T | T |
| 0.4135629039746362 | 0.4530336574078220 | 0.6015423569127236 | T | T | T |
| 0.7597010066089851 | 0.4532312296149712 | 0.5982190770458899 | T | T | T |
| 0.4440225136145131 | 0.3737965584871503 | 0.3654920990826867 | T | T | T |
| 0.8144557928272746 | 0.3772485889109660 | 0.3596153908904256 | T | T | T |
| 0.7521505439537535 | 0.0465831568022566 | 0.3352444854143641 | T | T | T |
| 0.0772462995854752 | 0.5427160384385132 | 0.3350785551190043 | T | T | T |
| 0.1502315666651199 | 0.3723053557202292 | 0.3602595863244176 | T | T | T |
| 0.9908765261199690 | 0.8673096254639177 | 0.3559360274658943 | T | T | T |
| 0.4216548009076391 | 0.0471195406525240 | 0.3345056120063319 | T | T | T |
| 0.3718575386813541 | 0.8745660382495686 | 0.3655256543349452 | T | T | T |
| 0.0880168194974331 | 0.0390260141255467 | 0.3349907607660114 | T | T | T |
| 0.7009641678773448 | 0.8747405016822754 | 0.3665052169414693 | T | T | T |
| 0.2507093397677167 | 0.2869750156245061 | 0.4048897473265924 | T | T | T |
| 0.2487825599503566 | 0.8078135823460428 | 0.3990978259412614 | T | T | T |
| 0.5746223107506552 | 0.3076972182914304 | 0.3972229403429637 | T | T | T |
| 0.5826351130429828 | 0.8060536990277356 | 0.4013407369751789 | T | T | T |
| 0.9145787049383287 | 0.3039513681431600 | 0.4001429698234844 | T | T | T |
| 0.9121343621653608 | 0.7925640382385666 | 0.4038399051164276 | T | T | T |
| 0.0833333129999971 | 0.4317300920000022 | 0.4673556090000019 | F | F | F |
| 0.0833333129999971 | 0.9317300920000022 | 0.4673556090000019 | F | F | F |
| 0.4166666870000029 | 0.4317300920000022 | 0.4673556090000019 | F | F | F |
| 0.4166666870000029 | 0.9317300920000022 | 0.4673556090000019 | F | F | F |
| 0.7500000000000000 | 0.4317300920000022 | 0.4673556090000019 | F | F | F |
| 0.7500000000000000 | 0.9317300920000022 | 0.4673556090000019 | F | F | F |
| 0.2500000000000000 | 0.0682699079999978 | 0.5326443909999981 | F | F | F |
| 0.2500000000000000 | 0.5682699079999978 | 0.5326443909999981 | F | F | F |
| 0.5833333129999971 | 0.0682699079999978 | 0.5326443909999981 | F | F | F |
| 0.5833333129999971 | 0.5682699079999978 | 0.5326443909999981 | F | F | F |
| 0.9166666870000029 | 0.0682699079999978 | 0.5326443909999981 | F | F | F |
| 0.9166666870000029 | 0.5682699079999978 | 0.5326443909999981 | F | F | F |
| 0.0878656378346392 | 0.2074359617614334 | 0.5961600948835724 | T | T | T |
| 0.0854212950616713 | 0.6960486318568400 | 0.5998570301765156 | T | T | T |
| 0.4173648869570172 | 0.1939463009722644 | 0.5986592630248211 | T | T | T |

|                    |                    |                    |   |   |   |
|--------------------|--------------------|--------------------|---|---|---|
| 0.4253776892493448 | 0.6923027817085696 | 0.6027770596570363 | T | T | T |
| 0.7512174400496434 | 0.1921864176539572 | 0.6009021740587386 | T | T | T |
| 0.7492906602322833 | 0.7130249843754939 | 0.5951102526734076 | T | T | T |
| 0.2990358321226552 | 0.1252594983177246 | 0.6334947830585307 | T | T | T |
| 0.9119831805025669 | 0.9609739858744604 | 0.6650092392339886 | T | T | T |
| 0.6281424613186459 | 0.1254339617504314 | 0.6344743456650548 | T | T | T |
| 0.5783451990923609 | 0.9528804593474760 | 0.6654943879936681 | T | T | T |
| 0.0091234738800310 | 0.1326903745360823 | 0.6440639725341057 | T | T | T |
| 0.8497684333348801 | 0.6276946442797708 | 0.6397404136755824 | T | T | T |
| 0.9227537004145248 | 0.4572839615614868 | 0.6649214448809957 | T | T | T |
| 0.2478494560462465 | 0.9534168431977434 | 0.6647555145856359 | T | T | T |
| 0.1855442071727254 | 0.6227514110890340 | 0.6403846091095744 | T | T | T |
| 0.5559774863854869 | 0.6262034415128497 | 0.6345079009173133 | T | T | T |
| 0.7417862870971419 | 0.5831700763818759 | 0.3630346836582916 | T | T | T |
| 0.2492429359675086 | 0.3883008988064702 | 0.3760610061599223 | T | T | T |
| 0.5581112431876036 | 0.3811614979493854 | 0.3730781775055618 | T | T | T |
| 0.7512714252122521 | 0.0995881830846415 | 0.3615785032682197 | T | T | T |
| 0.0802098534163136 | 0.5970906045623963 | 0.3610292741956087 | T | T | T |
| 0.4183542451874089 | 0.0977634820328959 | 0.3614150227643265 | T | T | T |
| 0.2614185238775590 | 0.8836657099619387 | 0.3753338871435403 | T | T | T |
| 0.0855072394922871 | 0.0936382426608731 | 0.3608653206657948 | T | T | T |
| 0.5892786612800620 | 0.8840821151969038 | 0.3763183965730690 | T | T | T |
| 0.9136543069913188 | 0.3836710213407528 | 0.3761309189616853 | T | T | T |
| 0.9046770293610891 | 0.8837166625356545 | 0.3765801282111667 | T | T | T |
| 0.2500014724586421 | 0.2076958223404546 | 0.4263016612550885 | T | T | T |
| 0.2496301470415005 | 0.7074701394536405 | 0.4261773327182823 | T | T | T |
| 0.5833873994659626 | 0.2093633644164115 | 0.4267337893674821 | T | T | T |
| 0.5826121849866368 | 0.7087604834942098 | 0.4263628626882507 | T | T | T |
| 0.9176960903105851 | 0.2083610027073419 | 0.4266547059555705 | T | T | T |
| 0.9154615146128506 | 0.7087526714994183 | 0.4265408573804379 | T | T | T |
| 0.0850338967840969 | 0.0190734948653883 | 0.4418166230781324 | T | T | T |
| 0.0799813032542147 | 0.5204718098484236 | 0.4425866373264071 | T | T | T |
| 0.4176217006275493 | 0.0198659540072583 | 0.4420416239576639 | T | T | T |
| 0.4133373661746518 | 0.5192357376143306 | 0.4401528400203603 | T | T | T |
| 0.7511132155757849 | 0.0200897711820005 | 0.4420769232891999 | T | T | T |
| 0.7548306044619437 | 0.5198389650187849 | 0.4444392553615515 | T | T | T |
| 0.0833333129999971 | 0.3437488080000008 | 0.4914442899999969 | F | F | F |
| 0.0833333129999971 | 0.8437487779999984 | 0.4914442899999969 | F | F | F |
| 0.4166666870000029 | 0.3437488080000008 | 0.4914442899999969 | F | F | F |
| 0.4166666870000029 | 0.8437487779999984 | 0.4914442899999969 | F | F | F |
| 0.7500000000000000 | 0.3437488080000008 | 0.4914442899999969 | F | F | F |
| 0.7500000000000000 | 0.8437487779999984 | 0.4914442899999969 | F | F | F |
| 0.2500000000000000 | 0.1562512220000016 | 0.5085557100000031 | F | F | F |
| 0.2500000000000000 | 0.6562511919999992 | 0.5085557100000031 | F | F | F |
| 0.5833333129999971 | 0.1562512220000016 | 0.5085557100000031 | F | F | F |
| 0.5833333129999971 | 0.6562511919999992 | 0.5085557100000031 | F | F | F |
| 0.9166666870000029 | 0.1562512220000016 | 0.5085557100000031 | F | F | F |
| 0.9166666870000029 | 0.6562511919999992 | 0.5085557100000031 | F | F | F |
| 0.2451693955380563 | 0.4801610349812151 | 0.5555607446384485 | T | T | T |
| 0.2488867844242151 | 0.9799102288179995 | 0.5579230767108001 | T | T | T |
| 0.5866626338253482 | 0.4807642623856694 | 0.5598471599796397 | T | T | T |
| 0.5823782993724507 | 0.9801340459927417 | 0.5579583760423361 | T | T | T |
| 0.9200186967457853 | 0.4795281901515764 | 0.5574133626735929 | T | T | T |
| 0.9149661032159031 | 0.9809265051346117 | 0.5581833769218676 | T | T | T |
| 0.0845384853871494 | 0.2912473285005817 | 0.5734591426195621 | T | T | T |
| 0.0823039096894149 | 0.7916389972926581 | 0.5733452940444295 | T | T | T |
| 0.4173878150133632 | 0.2912395165057902 | 0.5736371373117493 | T | T | T |
| 0.4166126005340374 | 0.7906366355835885 | 0.5732662106325179 | T | T | T |
| 0.7503698529584995 | 0.2925298605463595 | 0.5738226672817177 | T | T | T |
| 0.7499985275413579 | 0.7923041776595454 | 0.5736983387449115 | T | T | T |
| 0.0953229706389109 | 0.1162833374643455 | 0.6234198717888333 | T | T | T |
| 0.0863456930086812 | 0.6163289786592472 | 0.6238690810383147 | T | T | T |
| 0.4107213387199380 | 0.1159178848030962 | 0.6236816034269310 | T | T | T |

|                    |                    |                    |   |   |   |
|--------------------|--------------------|--------------------|---|---|---|
| 0.9144927605077058 | 0.9063617573391269 | 0.6391346793342052 | T | T | T |
| 0.7385814761224410 | 0.1163342900380613 | 0.6246661128564597 | T | T | T |
| 0.5816457548125911 | 0.9022365179671041 | 0.6385849772356735 | T | T | T |
| 0.9197901465836864 | 0.4029093954376037 | 0.6389707258043913 | T | T | T |
| 0.2487285747877479 | 0.9004118169153585 | 0.6384214967317803 | T | T | T |
| 0.4418887568123964 | 0.6188385020506146 | 0.6269218224944382 | T | T | T |
| 0.7507570640324914 | 0.6116991011935298 | 0.6239389938400777 | T | T | T |
| 0.2582137129028581 | 0.4168299236181241 | 0.6369653163417084 | T | T | T |

4'''

|                    |                     |                     |  |  |  |
|--------------------|---------------------|---------------------|--|--|--|
| 1.0000000000000000 |                     |                     |  |  |  |
| 8.5086002349999994 | 0.0000000000000000  | 0.0000000000000000  |  |  |  |
| 0.0000000000000000 | 10.8548107146999993 | 0.0000000000000000  |  |  |  |
| 0.0000000000000000 | 0.0000000000000000  | 30.0000000000000000 |  |  |  |

Co H O

24 44 58

Selective dynamics

Direct

|                    |                    |                    |   |   |   |
|--------------------|--------------------|--------------------|---|---|---|
| 0.2462477913368029 | 0.5462891068742972 | 0.4007793475306141 | T | T | T |
| 0.5929829396712540 | 0.5472358751322728 | 0.4016352438077921 | T | T | T |
| 0.5817967214393595 | 0.0502074861060946 | 0.4006560025874871 | T | T | T |
| 0.2480919386360350 | 0.0496896152819319 | 0.4001685411631779 | T | T | T |
| 0.9156062114623614 | 0.0511261221121179 | 0.4008345717365550 | T | T | T |
| 0.9169888795394205 | 0.5514958901954140 | 0.4001435553155898 | T | T | T |
| 0.0833333129999971 | 0.1817300920000022 | 0.4673556090000019 | F | F | F |
| 0.0833333129999971 | 0.6817300319999973 | 0.4673556090000019 | F | F | F |
| 0.4166666870000029 | 0.1817300920000022 | 0.4673556090000019 | F | F | F |
| 0.4166666870000029 | 0.6817300319999973 | 0.4673556090000019 | F | F | F |
| 0.7500000000000000 | 0.1817300920000022 | 0.4673556090000019 | F | F | F |
| 0.7500000000000000 | 0.6817300319999973 | 0.4673556090000019 | F | F | F |
| 0.2500000000000000 | 0.3182699680000027 | 0.5326443909999981 | F | F | F |
| 0.2500000000000000 | 0.8182699079999978 | 0.5326443909999981 | F | F | F |
| 0.5833333129999971 | 0.3182699680000027 | 0.5326443909999981 | F | F | F |
| 0.5833333129999971 | 0.8182699079999978 | 0.5326443909999981 | F | F | F |
| 0.9166666870000029 | 0.3182699680000027 | 0.5326443909999981 | F | F | F |
| 0.9166666870000029 | 0.8182699079999978 | 0.5326443909999981 | F | F | F |
| 0.0830111204605795 | 0.4485041098045860 | 0.5998564446844173 | T | T | T |
| 0.0843937885376313 | 0.9488738778878821 | 0.5991654282634449 | T | T | T |
| 0.7519080613639650 | 0.9503103847180681 | 0.5998314588368219 | T | T | T |
| 0.4182032785606405 | 0.9497925138939055 | 0.5993439974125129 | T | T | T |
| 0.4070170603287458 | 0.4527641248677272 | 0.5983647561922079 | T | T | T |
| 0.7537522086631970 | 0.4537108931257027 | 0.5992206524693859 | T | T | T |
| 0.7521055710526087 | 0.5451388887290575 | 0.3353489797483734 | T | T | T |
| 0.7291490724889611 | 0.3809586955850900 | 0.3705667437439064 | T | T | T |
| 0.7455495416852441 | 0.0408277913641286 | 0.3359488941468898 | T | T | T |
| 0.0812247382419580 | 0.5449498736378071 | 0.3353171934526034 | T | T | T |
| 0.1248119861375237 | 0.3812257411265689 | 0.3686559098240154 | T | T | T |
| 0.1235818485359161 | 0.8761354946823157 | 0.3673902282101906 | T | T | T |
| 0.4133773065508759 | 0.0456762895402303 | 0.3343129651970665 | T | T | T |
| 0.4729486494180012 | 0.8734760075326969 | 0.3618381880085252 | T | T | T |
| 0.0794547715128086 | 0.0485388606694990 | 0.3348994253760693 | T | T | T |
| 0.8404375486530068 | 0.8676320713730235 | 0.3562223538127742 | T | T | T |
| 0.2531771615787636 | 0.2880069495949608 | 0.4046999060113350 | T | T | T |
| 0.2506645669508005 | 0.8112329621674486 | 0.3988218163465250 | T | T | T |
| 0.5862962270805728 | 0.3125659139895036 | 0.3974763278800135 | T | T | T |
| 0.5859320184231799 | 0.8091917593444663 | 0.3981885473663200 | T | T | T |
| 0.9197060581428623 | 0.3257182916040356 | 0.3955491410602275 | T | T | T |
| 0.9193068825422585 | 0.7962494500704432 | 0.4039415716258003 | T | T | T |
| 0.0833333129999971 | 0.4317300920000022 | 0.4673556090000019 | F | F | F |
| 0.0833333129999971 | 0.9317300920000022 | 0.4673556090000019 | F | F | F |
| 0.4166666870000029 | 0.4317300920000022 | 0.4673556090000019 | F | F | F |
| 0.4166666870000029 | 0.9317300920000022 | 0.4673556090000019 | F | F | F |
| 0.7500000000000000 | 0.4317300920000022 | 0.4673556090000019 | F | F | F |

|                    |                    |                    |       |
|--------------------|--------------------|--------------------|-------|
| 0.7500000000000000 | 0.9317300920000022 | 0.4673556090000019 | F F F |
| 0.2500000000000000 | 0.0682699079999978 | 0.5326443909999981 | F F F |
| 0.2500000000000000 | 0.5682699079999978 | 0.5326443909999981 | F F F |
| 0.5833333129999971 | 0.0682699079999978 | 0.5326443909999981 | F F F |
| 0.5833333129999971 | 0.5682699079999978 | 0.5326443909999981 | F F F |
| 0.9166666870000029 | 0.0682699079999978 | 0.5326443909999981 | F F F |
| 0.9166666870000029 | 0.5682699079999978 | 0.5326443909999981 | F F F |
| 0.0806931174577414 | 0.2037505499295568 | 0.5960584283741999 | T T T |
| 0.0802939418571376 | 0.6742817083959644 | 0.6044508589397724 | T T T |
| 0.4140679815768201 | 0.1908082406555339 | 0.6018114526336800 | T T T |
| 0.4137037729194271 | 0.6874340860104966 | 0.6025236721199867 | T T T |
| 0.7493354330491995 | 0.1887670378325514 | 0.6011781836534751 | T T T |
| 0.7468228384212364 | 0.7119930504050392 | 0.5953000939886652 | T T T |
| 0.1595624513469933 | 0.1323679286269764 | 0.6437776461872258 | T T T |
| 0.9205452284871914 | 0.9514611393305009 | 0.6651005746239308 | T T T |
| 0.5270513505819987 | 0.1265239924673031 | 0.6381618119914749 | T T T |
| 0.5866226934491241 | 0.9543237104597697 | 0.6656870348029336 | T T T |
| 0.8764181514640840 | 0.1238645053176844 | 0.6326097717898093 | T T T |
| 0.8751880138624762 | 0.6187742588734311 | 0.6313440901759848 | T T T |
| 0.9187752617580349 | 0.4550501263621929 | 0.6646828065473965 | T T T |
| 0.2544504583147557 | 0.9591722086358715 | 0.6640511058531102 | T T T |
| 0.2708509275110387 | 0.6190413044149099 | 0.6294332562560936 | T T T |
| 0.2478944289473914 | 0.4548611112709425 | 0.6646510202516266 | T T T |
| 0.7489092454919348 | 0.6017210577141625 | 0.3607309386051169 | T T T |
| 0.2392041025509695 | 0.3911371186883819 | 0.3762495502572275 | T T T |
| 0.6087452314280171 | 0.3878477641476923 | 0.3755235364313715 | T T T |
| 0.7483201212590186 | 0.0968423599942394 | 0.3614298027592265 | T T T |
| 0.0851045288402334 | 0.6004357472751132 | 0.3610275416676347 | T T T |
| 0.4146528859449397 | 0.0965524854434757 | 0.3611646771317218 | T T T |
| 0.2382743396138238 | 0.8847454093230843 | 0.3753327757148862 | T T T |
| 0.0823938154849133 | 0.1003300748813309 | 0.3615287162089015 | T T T |
| 0.5784203063491768 | 0.8840400993089973 | 0.3746504354569830 | T T T |
| 0.9141900975301149 | 0.3949365655573501 | 0.3728141539574518 | T T T |
| 0.9273840625050247 | 0.8843768248638395 | 0.3766100982418721 | T T T |
| 0.2511223909114953 | 0.2089884871643769 | 0.4261932418999433 | T T T |
| 0.2532038258880279 | 0.7058626712575539 | 0.4259608391148363 | T T T |
| 0.5821423097422710 | 0.2082381274013192 | 0.4266875930898272 | T T T |
| 0.5824205133403466 | 0.7071435353338250 | 0.4261253271689367 | T T T |
| 0.9165629135500462 | 0.2083597593429619 | 0.4272113889401297 | T T T |
| 0.9168210841255197 | 0.7113101309558387 | 0.4270291305362724 | T T T |
| 0.0832137849963694 | 0.0202557354209522 | 0.4420248238451396 | T T T |
| 0.0737360026500100 | 0.5199808104788544 | 0.4436032949271436 | T T T |
| 0.4146913082665944 | 0.0196140338229481 | 0.4419159298117930 | T T T |
| 0.4205607535598147 | 0.5179546160930032 | 0.4402356534902646 | T T T |
| 0.7486888130573656 | 0.0196126250161314 | 0.4420586027239879 | T T T |
| 0.7531803699425945 | 0.5212556021416664 | 0.4422252868044976 | T T T |
| 0.0833333129999971 | 0.3437488080000008 | 0.4914442899999969 | F F F |
| 0.0833333129999971 | 0.8437487779999984 | 0.4914442899999969 | F F F |
| 0.4166666870000029 | 0.3437488080000008 | 0.4914442899999969 | F F F |
| 0.4166666870000029 | 0.8437487779999984 | 0.4914442899999969 | F F F |
| 0.7500000000000000 | 0.3437488080000008 | 0.4914442899999969 | F F F |
| 0.7500000000000000 | 0.8437487779999984 | 0.4914442899999969 | F F F |
| 0.2500000000000000 | 0.1562512220000016 | 0.5085557100000031 | F F F |
| 0.2500000000000000 | 0.6562511919999992 | 0.5085557100000031 | F F F |
| 0.5833333129999971 | 0.1562512220000016 | 0.5085557100000031 | F F F |
| 0.5833333129999971 | 0.6562511919999992 | 0.5085557100000031 | F F F |
| 0.9166666870000029 | 0.1562512220000016 | 0.5085557100000031 | F F F |
| 0.9166666870000029 | 0.6562511919999992 | 0.5085557100000031 | F F F |
| 0.2468196300574056 | 0.4787443978583338 | 0.5577747131955026 | T T T |
| 0.2513111869426343 | 0.9803873749838685 | 0.5579413972760121 | T T T |
| 0.5794392464401784 | 0.4820453839069968 | 0.5597643465097354 | T T T |
| 0.5853086917334057 | 0.9803859661770519 | 0.5580840701882070 | T T T |
| 0.9262639973499899 | 0.4800191895211458 | 0.5563967050728565 | T T T |

|                    |                    |                    |   |   |   |
|--------------------|--------------------|--------------------|---|---|---|
| 0.9167862150036307 | 0.9797442645790478 | 0.5579751761548603 | T | T | T |
| 0.0831789158744803 | 0.2886898690441612 | 0.5729708694637276 | T | T | T |
| 0.0834370864499539 | 0.7916402406570382 | 0.5727886110598706 | T | T | T |
| 0.4175794866596534 | 0.2928564646661748 | 0.5738746728310635 | T | T | T |
| 0.4178576902577290 | 0.7917618725986808 | 0.5733124069101727 | T | T | T |
| 0.7467961741119722 | 0.2941373287424464 | 0.5740391608851635 | T | T | T |
| 0.7488776090885120 | 0.7910115128356232 | 0.5738067581000568 | T | T | T |
| 0.0726159374949751 | 0.1156231751361606 | 0.6233899017581278 | T | T | T |
| 0.0858099024698850 | 0.6050634344426499 | 0.6271858460425482 | T | T | T |
| 0.4215796936508234 | 0.1159599006910029 | 0.6253495645430170 | T | T | T |
| 0.9176061845150868 | 0.8996699251186692 | 0.6384712837910982 | T | T | T |
| 0.7617256603861761 | 0.1152545906769158 | 0.6246672242851137 | T | T | T |
| 0.5853471140550603 | 0.9034475145565242 | 0.6388353228682783 | T | T | T |
| 0.9148954711597667 | 0.3995642527248869 | 0.6389724583323653 | T | T | T |
| 0.2516798787409814 | 0.9031576400057605 | 0.6385701972407662 | T | T | T |
| 0.3912547685719830 | 0.6121522358523075 | 0.6244764635686284 | T | T | T |
| 0.7607958974490303 | 0.6088628813116181 | 0.6237504497427726 | T | T | T |
| 0.2510907545080652 | 0.3982789422858378 | 0.6392690613948832 | T | T | T |

5

|                    |                     |                     |  |  |  |
|--------------------|---------------------|---------------------|--|--|--|
| 1.0000000000000000 |                     |                     |  |  |  |
| 8.5086002349999994 | 0.0000000000000000  | 0.0000000000000000  |  |  |  |
| 0.0000000000000000 | 10.8548107146999993 | 0.0000000000000000  |  |  |  |
| 0.0000000000000000 | 0.0000000000000000  | 30.0000000000000000 |  |  |  |

Co H O

24 46 64

Selective dynamics

Direct

|                    |                    |                    |   |   |   |
|--------------------|--------------------|--------------------|---|---|---|
| 0.5843216568011212 | 0.5517151340699648 | 0.4002310812075721 | T | T | T |
| 0.2500858638969380 | 0.5524805900345888 | 0.3994775498573146 | T | T | T |
| 0.5850872587867169 | 0.0491193573516488 | 0.4008217992896692 | T | T | T |
| 0.2519229282146084 | 0.0446801506345315 | 0.3998817733331391 | T | T | T |
| 0.9179699672900065 | 0.0470716566243333 | 0.4002047668571450 | T | T | T |
| 0.9167957817601682 | 0.5504397155496898 | 0.4000579711634133 | T | T | T |
| 0.0833333129999971 | 0.1817300920000022 | 0.4673556090000019 | F | F | F |
| 0.0833333129999971 | 0.6817300319999973 | 0.4673556090000019 | F | F | F |
| 0.4166666870000029 | 0.1817300920000022 | 0.4673556090000019 | F | F | F |
| 0.4166666870000029 | 0.6817300319999973 | 0.4673556090000019 | F | F | F |
| 0.7500000000000000 | 0.1817300920000022 | 0.4673556090000019 | F | F | F |
| 0.7500000000000000 | 0.6817300319999973 | 0.4673556090000019 | F | F | F |
| 0.2500000000000000 | 0.3182699680000027 | 0.5326443909999981 | F | F | F |
| 0.2500000000000000 | 0.8182699079999978 | 0.5326443909999981 | F | F | F |
| 0.5833333129999971 | 0.3182699680000027 | 0.5326443909999981 | F | F | F |
| 0.5833333129999971 | 0.8182699079999978 | 0.5326443909999981 | F | F | F |
| 0.9166666870000029 | 0.3182699680000027 | 0.5326443909999981 | F | F | F |
| 0.9166666870000029 | 0.8182699079999978 | 0.5326443909999981 | F | F | F |
| 0.0832042182398319 | 0.4495602844503173 | 0.5999420288365868 | T | T | T |
| 0.0820300327099936 | 0.9529283433756668 | 0.5997952331428550 | T | T | T |
| 0.7480770717853914 | 0.9553198493654684 | 0.6001182266668609 | T | T | T |
| 0.4149127412132830 | 0.9508806426483511 | 0.5991782007103379 | T | T | T |
| 0.7499141361030619 | 0.4475194099654113 | 0.6005224501426855 | T | T | T |
| 0.4156783431988715 | 0.4482848659300283 | 0.5997689187924279 | T | T | T |
| 0.3562007659744962 | 0.4920864904013455 | 0.3174069779739327 | T | T | T |
| 0.7481229141444041 | 0.5519672424823521 | 0.3346222656636524 | T | T | T |
| 0.7116012437854771 | 0.3787479443845696 | 0.3692275443606093 | T | T | T |
| 0.7521985367969081 | 0.0457311256118492 | 0.3347374738249433 | T | T | T |
| 0.0882610140924124 | 0.5484983644046343 | 0.3344744522719899 | T | T | T |
| 0.9748637641923187 | 0.3690056363744383 | 0.3521183227957639 | T | T | T |
| 0.0149597335365700 | 0.8687854516905427 | 0.3611137257029914 | T | T | T |
| 0.4222478960762842 | 0.0430004053634813 | 0.3346098646125067 | T | T | T |
| 0.3585612738690954 | 0.8690498643107145 | 0.3629108152429784 | T | T | T |
| 0.0863201424772215 | 0.0430446259477213 | 0.3340615134563008 | T | T | T |
| 0.6952860161245376 | 0.8709648843431655 | 0.3637773165540541 | T | T | T |



|                    |                    |                    |   |   |   |
|--------------------|--------------------|--------------------|---|---|---|
| 0.2500935951586784 | 0.2763251242746109 | 0.4045986331311023 | T | T | T |
| 0.2480964389387521 | 0.8012435274663162 | 0.4017513525029073 | T | T | T |
| 0.5767101788278004 | 0.3161063632229090 | 0.3971163311560210 | T | T | T |
| 0.5817229419014504 | 0.8059425853225128 | 0.4003636576240813 | T | T | T |
| 0.9155736064870437 | 0.2902565465316003 | 0.4039151755474078 | T | T | T |
| 0.9141538919223010 | 0.7977501053304679 | 0.4026613551961075 | T | T | T |
| 0.0833333129999971 | 0.4317300920000022 | 0.4673556090000019 | F | F | F |
| 0.0833333129999971 | 0.9317300920000022 | 0.4673556090000019 | F | F | F |
| 0.4166666870000029 | 0.4317300920000022 | 0.4673556090000019 | F | F | F |
| 0.4166666870000029 | 0.9317300920000022 | 0.4673556090000019 | F | F | F |
| 0.7500000000000000 | 0.4317300920000022 | 0.4673556090000019 | F | F | F |
| 0.7500000000000000 | 0.9317300920000022 | 0.4673556090000019 | F | F | F |
| 0.2500000000000000 | 0.0682699079999978 | 0.5326443909999981 | F | F | F |
| 0.2500000000000000 | 0.5682699079999978 | 0.5326443909999981 | F | F | F |
| 0.5833333129999971 | 0.0682699079999978 | 0.5326443909999981 | F | F | F |
| 0.5833333129999971 | 0.5682699079999978 | 0.5326443909999981 | F | F | F |
| 0.9166666870000029 | 0.0682699079999978 | 0.5326443909999981 | F | F | F |
| 0.9166666870000029 | 0.5682699079999978 | 0.5326443909999981 | F | F | F |
| 0.0858461080776989 | 0.2022498946695320 | 0.5973386448038924 | T | T | T |
| 0.0844263935129563 | 0.7097434534683997 | 0.5960848244525920 | T | T | T |
| 0.4182770580985496 | 0.1940574146774871 | 0.5996363423759189 | T | T | T |
| 0.4232898211721996 | 0.6838936367770910 | 0.6028836688439861 | T | T | T |
| 0.7519035610612478 | 0.1987564725336838 | 0.5982486474970926 | T | T | T |
| 0.7499064048413218 | 0.7236748757253891 | 0.5954013668688976 | T | T | T |
| 0.3047139838754552 | 0.1290351156568345 | 0.6362226834459460 | T | T | T |
| 0.9136798575227786 | 0.9569553740522787 | 0.6659384865437064 | T | T | T |
| 0.6414387261309048 | 0.1309501356892855 | 0.6370891847570217 | T | T | T |
| 0.5777521039237158 | 0.9569995946365184 | 0.6653901353875005 | T | T | T |
| 0.9850402664634300 | 0.1312145483094501 | 0.6388862742970086 | T | T | T |
| 0.0251362358076811 | 0.6309943636255616 | 0.6478816772042362 | T | T | T |
| 0.9117389859075875 | 0.4515016355953655 | 0.6655255477280099 | T | T | T |
| 0.2478014632030919 | 0.9542688743881509 | 0.6652625261750567 | T | T | T |
| 0.2883987562145229 | 0.6212520556154306 | 0.6307724556393909 | T | T | T |
| 0.2518770858555961 | 0.4480327575176478 | 0.6653777343363405 | T | T | T |
| 0.6437992340255035 | 0.5079135095986546 | 0.6825930220260673 | T | T | T |
| 0.4226640114113214 | 0.5697559625866406 | 0.3167536203956082 | T | T | T |
| 0.2377067281141218 | 0.3834878760853588 | 0.3323951838242145 | T | T | T |
| 0.4190813621250736 | 0.6094499656735358 | 0.3627904381614377 | T | T | T |
| 0.7505425936975498 | 0.6022679547759102 | 0.3616441289974422 | T | T | T |
| 0.2496387058500635 | 0.3957175289676499 | 0.3766228216052501 | T | T | T |
| 0.5951314567786713 | 0.3882453118483229 | 0.3746179306653401 | T | T | T |
| 0.7517218832570725 | 0.0966890587422200 | 0.3616027680780841 | T | T | T |
| 0.0832392168856817 | 0.6005331792452751 | 0.3611499205365074 | T | T | T |
| 0.4179120402722784 | 0.0938756007470255 | 0.3614642489589545 | T | T | T |
| 0.2535647193697758 | 0.8815364839769230 | 0.3760278709013938 | T | T | T |
| 0.0850338455560437 | 0.0929189336703624 | 0.3611786411249273 | T | T | T |
| 0.5881580735532107 | 0.8828736019952604 | 0.3758556909540718 | T | T | T |
| 0.9043799319960424 | 0.3849755135575516 | 0.3771063669598680 | T | T | T |
| 0.9147894060350069 | 0.8823883431961747 | 0.3766492753168386 | T | T | T |
| 0.2498648104084489 | 0.2047871935883048 | 0.4260621712393498 | T | T | T |
| 0.2492294009935313 | 0.7102497695736143 | 0.4270427422451813 | T | T | T |
| 0.5820199752810008 | 0.2076374892040546 | 0.4269300303693872 | T | T | T |
| 0.5826056475960577 | 0.7094881725931654 | 0.4271014780802159 | T | T | T |
| 0.9174576480694115 | 0.2076506132684974 | 0.4263657794024339 | T | T | T |
| 0.9165019371221077 | 0.7089784315364963 | 0.4267764150238041 | T | T | T |
| 0.0846079538836504 | 0.0187403108941963 | 0.4419783716211519 | T | T | T |
| 0.0841157103817051 | 0.5198448403110745 | 0.4416269558229349 | T | T | T |
| 0.4173973252317024 | 0.0188607735192597 | 0.4420904751740755 | T | T | T |
| 0.4161406453617790 | 0.5198018855878375 | 0.4413508383042278 | T | T | T |
| 0.7515254412059670 | 0.0195657964670089 | 0.4421671469049693 | T | T | T |
| 0.7508204238991295 | 0.5201641103885076 | 0.4419541640236097 | T | T | T |
| 0.0833333129999971 | 0.3437488080000008 | 0.4914442899999969 | F | F | F |
| 0.0833333129999971 | 0.8437487779999984 | 0.4914442899999969 | F | F | F |

|                    |                    |                    |   |   |   |
|--------------------|--------------------|--------------------|---|---|---|
| 0.416666870000029  | 0.3437488080000008 | 0.4914442899999969 | F | F | F |
| 0.416666870000029  | 0.8437487779999984 | 0.4914442899999969 | F | F | F |
| 0.7500000000000000 | 0.3437488080000008 | 0.4914442899999969 | F | F | F |
| 0.7500000000000000 | 0.8437487779999984 | 0.4914442899999969 | F | F | F |
| 0.2500000000000000 | 0.1562512220000016 | 0.5085557100000031 | F | F | F |
| 0.2500000000000000 | 0.6562511919999992 | 0.5085557100000031 | F | F | F |
| 0.5833333129999971 | 0.1562512220000016 | 0.5085557100000031 | F | F | F |
| 0.5833333129999971 | 0.6562511919999992 | 0.5085557100000031 | F | F | F |
| 0.916666870000029  | 0.1562512220000016 | 0.5085557100000031 | F | F | F |
| 0.916666870000029  | 0.6562511919999992 | 0.5085557100000031 | F | F | F |
| 0.2491795761008705 | 0.4798358896114993 | 0.5580458359763903 | T | T | T |
| 0.2484745587940330 | 0.9804342035329913 | 0.5578328530950307 | T | T | T |
| 0.5838593546382213 | 0.4801981144121624 | 0.5586491616957725 | T | T | T |
| 0.5826026747682975 | 0.9811392264807403 | 0.5579095248259245 | T | T | T |
| 0.9158842896182948 | 0.4801551596889254 | 0.5583730441770651 | T | T | T |
| 0.9153920461163496 | 0.9812596891058035 | 0.5580216283788479 | T | T | T |
| 0.0834980628778923 | 0.2910215684635038 | 0.5732235849761959 | T | T | T |
| 0.0825423519305814 | 0.7923493867315026 | 0.5736342205975662 | T | T | T |
| 0.4173943524039424 | 0.2905118274068343 | 0.5728985219197842 | T | T | T |
| 0.4179800247189991 | 0.7923625107959454 | 0.5730699696306129 | T | T | T |
| 0.7507705990064687 | 0.2897502304263857 | 0.5729572577548188 | T | T | T |
| 0.7501351895915512 | 0.7952128064116953 | 0.5739378287606502 | T | T | T |
| 0.0852105939649933 | 0.1176116568038325 | 0.6233507246831616 | T | T | T |
| 0.0956200680039647 | 0.6150244864424484 | 0.6228936330401319 | T | T | T |
| 0.4118419264467895 | 0.1171263980047327 | 0.6241443090459282 | T | T | T |
| 0.9149661544439562 | 0.9070810663296377 | 0.6388213588750727 | T | T | T |
| 0.7464352806302312 | 0.1184635160230771 | 0.6239721290986062 | T | T | T |
| 0.5820879597277286 | 0.9061243992529744 | 0.6385357510410455 | T | T | T |
| 0.9167607831143182 | 0.3994668207547251 | 0.6388500794634926 | T | T | T |
| 0.2482781167429275 | 0.9033109412577802 | 0.6383972319219160 | T | T | T |
| 0.4048685432213288 | 0.6117546881516769 | 0.6253820693346600 | T | T | T |
| 0.7503612941499364 | 0.6042824710323429 | 0.6233771783947498 | T | T | T |
| 0.2494574063024503 | 0.3977320452240897 | 0.6383558710025580 | T | T | T |
| 0.5809186378749266 | 0.3905500343264642 | 0.6372095618385623 | T | T | T |
| 0.7622932718858784 | 0.6165121239146342 | 0.6676048161757856 | T | T | T |
| 0.5773359885886786 | 0.4302440374133594 | 0.6832463796043918 | T | T | T |

5'

|                    |                     |                     |  |  |  |
|--------------------|---------------------|---------------------|--|--|--|
| 1.000000000000000  |                     |                     |  |  |  |
| 8.5086002349999994 | 0.0000000000000000  | 0.0000000000000000  |  |  |  |
| 0.0000000000000000 | 10.8548107146999993 | 0.0000000000000000  |  |  |  |
| 0.0000000000000000 | 0.0000000000000000  | 30.0000000000000000 |  |  |  |

Co H O  
24 46 64

Selective dynamics

Direct

|                    |                    |                    |   |   |   |
|--------------------|--------------------|--------------------|---|---|---|
| 0.5850081002261618 | 0.5522924082561076 | 0.3998127294839904 | T | T | T |
| 0.2520073537516794 | 0.5535272477311395 | 0.3995532851590156 | T | T | T |
| 0.5813284699387467 | 0.0446187296029379 | 0.3998264331020991 | T | T | T |
| 0.2476694591893747 | 0.0451576266988454 | 0.3999131304558716 | T | T | T |
| 0.9143954677842814 | 0.0484901394904398 | 0.4007823937931789 | T | T | T |
| 0.9186968427890676 | 0.5517405913013107 | 0.4005135566587512 | T | T | T |
| 0.0833333129999971 | 0.1817300920000022 | 0.4673556090000019 | F | F | F |
| 0.0833333129999971 | 0.6817300319999973 | 0.4673556090000019 | F | F | F |
| 0.416666870000029  | 0.1817300920000022 | 0.4673556090000019 | F | F | F |
| 0.416666870000029  | 0.6817300319999973 | 0.4673556090000019 | F | F | F |
| 0.7500000000000000 | 0.1817300920000022 | 0.4673556090000019 | F | F | F |
| 0.7500000000000000 | 0.6817300319999973 | 0.4673556090000019 | F | F | F |
| 0.2500000000000000 | 0.3182699680000027 | 0.5326443909999981 | F | F | F |
| 0.2500000000000000 | 0.8182699079999978 | 0.5326443909999981 | F | F | F |
| 0.5833333129999971 | 0.3182699680000027 | 0.5326443909999981 | F | F | F |
| 0.5833333129999971 | 0.8182699079999978 | 0.5326443909999981 | F | F | F |
| 0.916666870000029  | 0.3182699680000027 | 0.5326443909999981 | F | F | F |

|                    |                    |                    |       |
|--------------------|--------------------|--------------------|-------|
| 0.9166666870000029 | 0.8182699079999978 | 0.5326443909999981 | F F F |
| 0.0813031572109253 | 0.4482594086986893 | 0.5994864433412488 | T T T |
| 0.0856045322157186 | 0.9515098605095602 | 0.5992176062068282 | T T T |
| 0.7523305408106324 | 0.9548423733011546 | 0.6000868695441284 | T T T |
| 0.4186715300612533 | 0.9553812703970621 | 0.6001735668979009 | T T T |
| 0.7479926462483206 | 0.4464727522688534 | 0.6004467148409844 | T T T |
| 0.4149918997738453 | 0.4477075917438924 | 0.6001872705160167 | T T T |
| 0.3878679674637624 | 0.3611439315191021 | 0.3271849111594491 | T T T |
| 0.4201183943923397 | 0.5509364180525509 | 0.3350894610094599 | T T T |
| 0.7491727303572517 | 0.5348817798311032 | 0.3370545276511976 | T T T |
| 0.7478419642349650 | 0.0450755063478283 | 0.3343959393254536 | T T T |
| 0.0852231646417394 | 0.5553677330506090 | 0.3341865408013831 | T T T |
| 0.0482988705070824 | 0.3796210594374472 | 0.3715676798113208 | T T T |
| 0.1442395286669012 | 0.8683025988209749 | 0.3621557529102262 | T T T |
| 0.4123190249270081 | 0.0430616021913366 | 0.3338763716398745 | T T T |
| 0.4825635217320041 | 0.8677164755986198 | 0.3615390456097103 | T T T |
| 0.0773046301963234 | 0.0446007819238048 | 0.3345439322203703 | T T T |
| 0.8044213761508416 | 0.8711532025346642 | 0.3636372506773924 | T T T |
| 0.2543985194538863 | 0.2786682754386263 | 0.4035168688133552 | T T T |
| 0.2518498860689320 | 0.8005791434398120 | 0.4021314909531313 | T T T |
| 0.5825705545217872 | 0.2772823255691037 | 0.4046080657987545 | T T T |
| 0.5859394328867111 | 0.7964865119515423 | 0.4033587214400143 | T T T |
| 0.9100054929985149 | 0.3152277238609003 | 0.3973835746355192 | T T T |
| 0.9182599448992335 | 0.8060767272566309 | 0.4000782962874254 | T T T |
| 0.0833333129999971 | 0.4317300920000022 | 0.4673556090000019 | F F F |
| 0.0833333129999971 | 0.9317300920000022 | 0.4673556090000019 | F F F |
| 0.4166666870000029 | 0.4317300920000022 | 0.4673556090000019 | F F F |
| 0.4166666870000029 | 0.9317300920000022 | 0.4673556090000019 | F F F |
| 0.7500000000000000 | 0.4317300920000022 | 0.4673556090000019 | F F F |
| 0.7500000000000000 | 0.9317300920000022 | 0.4673556090000019 | F F F |
| 0.2500000000000000 | 0.0682699079999978 | 0.5326443909999981 | F F F |
| 0.2500000000000000 | 0.5682699079999978 | 0.5326443909999981 | F F F |
| 0.5833333129999971 | 0.0682699079999978 | 0.5326443909999981 | F F F |
| 0.5833333129999971 | 0.5682699079999978 | 0.5326443909999981 | F F F |
| 0.9166666870000029 | 0.0682699079999978 | 0.5326443909999981 | F F F |
| 0.9166666870000029 | 0.5682699079999978 | 0.5326443909999981 | F F F |
| 0.0817400551007665 | 0.1939232727433691 | 0.5999217037125675 | T T T |
| 0.0899945070014851 | 0.6847722761390997 | 0.6026164253644808 | T T T |
| 0.4140605671132889 | 0.2035134880484506 | 0.5966412785599857 | T T T |
| 0.4174294454782128 | 0.7227176744309034 | 0.5953919342012455 | T T T |
| 0.7481501139310680 | 0.1994208565601880 | 0.5978685090468687 | T T T |
| 0.7456014805461137 | 0.7213317245613737 | 0.5964831311866448 | T T T |
| 0.1955786238491584 | 0.1288467974653358 | 0.6363627493226076 | T T T |
| 0.9226953698036766 | 0.9553992180761952 | 0.6654560677796297 | T T T |
| 0.5174364782679959 | 0.1322835244013802 | 0.6384609543902897 | T T T |
| 0.5876809750729919 | 0.9569383978086634 | 0.6661236283601255 | T T T |
| 0.8557604713330988 | 0.1316974011790251 | 0.6378442470897738 | T T T |
| 0.9517011294929176 | 0.6203789405625528 | 0.6284323201886792 | T T T |
| 0.9147768353582606 | 0.4446322669493981 | 0.6658134591986169 | T T T |
| 0.2521580357650350 | 0.9549244936521717 | 0.6656040606745464 | T T T |
| 0.2508272696427554 | 0.4651182201688897 | 0.6629454723488024 | T T T |
| 0.5798816056076603 | 0.4490635819474491 | 0.6649105389905401 | T T T |
| 0.6121320325362376 | 0.6388560684808979 | 0.6728150888405509 | T T T |
| 0.5782440492902836 | 0.3861760442380273 | 0.3325337623870439 | T T T |
| 0.2719954524200858 | 0.3810481646869022 | 0.3284775505273103 | T T T |
| 0.4192562750938080 | 0.6041876057168807 | 0.3615198630819094 | T T T |
| 0.7520441438560752 | 0.5968394637929677 | 0.3609121291232213 | T T T |
| 0.2441673678002019 | 0.3911989152603041 | 0.3760553426859659 | T T T |
| 0.5813635411165876 | 0.3954899722948326 | 0.3771586897577208 | T T T |
| 0.7476006976258134 | 0.0945532174044459 | 0.3616212464362150 | T T T |
| 0.0844627615107356 | 0.6040560073421517 | 0.3616193734816093 | T T T |
| 0.4146400889411197 | 0.0921838184750143 | 0.3611738691901252 | T T T |
| 0.2473903298656523 | 0.8817685526176362 | 0.3762017215480284 | T T T |

|                    |                    |                    |   |   |   |
|--------------------|--------------------|--------------------|---|---|---|
| 0.0812939611902195 | 0.0945622321908601 | 0.3616287857118508 | T | T | T |
| 0.5843063716919943 | 0.8818322845576958 | 0.3762676114128638 | T | T | T |
| 0.9314704434097791 | 0.3879214776792281 | 0.3751567501602864 | T | T | T |
| 0.9116686550202360 | 0.8826956330127231 | 0.3756681951499061 | T | T | T |
| 0.2508921032664020 | 0.2060986581491449 | 0.4259129163904234 | T | T | T |
| 0.2511226441507617 | 0.7106207208701179 | 0.4272175074709637 | T | T | T |
| 0.5827549395152261 | 0.2051130662273124 | 0.4260959776345885 | T | T | T |
| 0.5843763108473681 | 0.7104886076705839 | 0.4270874426061511 | T | T | T |
| 0.9152726866815186 | 0.2072983543224396 | 0.4269332378698678 | T | T | T |
| 0.9167215090258125 | 0.7094705887829704 | 0.4270706215215938 | T | T | T |
| 0.0822879741627176 | 0.0190439974315026 | 0.4421354261279546 | T | T | T |
| 0.0855126688136494 | 0.5203181140506672 | 0.4417723222736427 | T | T | T |
| 0.4150162935122594 | 0.0185154467840931 | 0.4419645992819241 | T | T | T |
| 0.4177659156120654 | 0.5202477624875002 | 0.4416554707821803 | T | T | T |
| 0.7479402055605036 | 0.0188336753989162 | 0.4421673975056564 | T | T | T |
| 0.7507834755243508 | 0.5196259673013799 | 0.4417769802896885 | T | T | T |
| 0.0833333129999971 | 0.3437488080000008 | 0.4914442899999969 | F | F | F |
| 0.0833333129999971 | 0.8437487779999984 | 0.4914442899999969 | F | F | F |
| 0.4166666870000029 | 0.3437488080000008 | 0.4914442899999969 | F | F | F |
| 0.4166666870000029 | 0.8437487779999984 | 0.4914442899999969 | F | F | F |
| 0.7500000000000000 | 0.3437488080000008 | 0.4914442899999969 | F | F | F |
| 0.7500000000000000 | 0.8437487779999984 | 0.4914442899999969 | F | F | F |
| 0.2500000000000000 | 0.1562512220000016 | 0.5085557100000031 | F | F | F |
| 0.2500000000000000 | 0.6562511919999992 | 0.5085557100000031 | F | F | F |
| 0.5833333129999971 | 0.1562512220000016 | 0.5085557100000031 | F | F | F |
| 0.5833333129999971 | 0.6562511919999992 | 0.5085557100000031 | F | F | F |
| 0.9166666870000029 | 0.1562512220000016 | 0.5085557100000031 | F | F | F |
| 0.9166666870000029 | 0.6562511919999992 | 0.5085557100000031 | F | F | F |
| 0.2492165244756492 | 0.4803740326986201 | 0.5582230197103115 | T | T | T |
| 0.2520597944394964 | 0.9811663246010838 | 0.5578326024943436 | T | T | T |
| 0.5822340843879417 | 0.4797522375124998 | 0.5583445292178197 | T | T | T |
| 0.5849837064877406 | 0.9814845532159069 | 0.5580354007180759 | T | T | T |
| 0.9144873311863506 | 0.4796818859493328 | 0.5582276777263573 | T | T | T |
| 0.9177120258372824 | 0.9809560025684974 | 0.5578645738720454 | T | T | T |
| 0.0832784909741875 | 0.2905294112170296 | 0.5729293784784062 | T | T | T |
| 0.0847273133184814 | 0.7927016456775604 | 0.5730667621301322 | T | T | T |
| 0.4156236891526248 | 0.2895113923294161 | 0.5729125573938489 | T | T | T |
| 0.4172450604847739 | 0.7948869337726876 | 0.5739040223654115 | T | T | T |
| 0.7488773558492383 | 0.2893792791298821 | 0.5727824925290363 | T | T | T |
| 0.7491078967335980 | 0.7939013418508551 | 0.5740870836095766 | T | T | T |
| 0.0883313449797640 | 0.1173043669872769 | 0.6243318048500939 | T | T | T |
| 0.0685295565902209 | 0.6120785223207719 | 0.6248432498397136 | T | T | T |
| 0.4156936283080128 | 0.1181677154423042 | 0.6237323885871362 | T | T | T |
| 0.9187060388097805 | 0.9054377678091399 | 0.6383712142881492 | T | T | T |
| 0.7526096701343477 | 0.1182314473823638 | 0.6237982784519716 | T | T | T |
| 0.5853599110588803 | 0.9078161815249857 | 0.6388261308098748 | T | T | T |
| 0.9155372384892644 | 0.3959439926578483 | 0.6383806265183907 | T | T | T |
| 0.2523993023741866 | 0.9054467825955541 | 0.6383787535637850 | T | T | T |
| 0.4186364588834124 | 0.6045100277051674 | 0.6228413102422792 | T | T | T |
| 0.7558326321997981 | 0.6088010847396959 | 0.6239446573140341 | T | T | T |
| 0.2479558561439248 | 0.4031605362070323 | 0.6390878708767787 | T | T | T |
| 0.5807437249061920 | 0.3958123942831193 | 0.6384801369180906 | T | T | T |
| 0.7280045475799213 | 0.6189518353130978 | 0.6715224494726897 | T | T | T |
| 0.4217559507097164 | 0.6138239557619727 | 0.6674662376129561 | T | T | T |

5"

|                    |                     |                     |
|--------------------|---------------------|---------------------|
| 1.0000000000000000 |                     |                     |
| 8.5086002349999994 | 0.0000000000000000  | 0.0000000000000000  |
| 0.0000000000000000 | 10.8548107146999993 | 0.0000000000000000  |
| 0.0000000000000000 | 0.0000000000000000  | 30.0000000000000000 |

Co H O

24 46 64

Selective dynamics

Direct

|                    |                    |                    |   |   |   |
|--------------------|--------------------|--------------------|---|---|---|
| 0.5787247192035490 | 0.5478964481735720 | 0.4009152764498746 | T | T | T |
| 0.2468937543753005 | 0.5496367613068137 | 0.4003837306064000 | T | T | T |
| 0.5860043504030163 | 0.0504239803246734 | 0.4005578659770623 | T | T | T |
| 0.2518545456595935 | 0.0496233403378546 | 0.4005713907942805 | T | T | T |
| 0.9189278217159159 | 0.0502458861330750 | 0.4004839701751790 | T | T | T |
| 0.9172368583095464 | 0.5500961803711845 | 0.4004667831391455 | T | T | T |
| 0.0833333129999971 | 0.1817300920000022 | 0.4673556090000019 | F | F | F |
| 0.0833333129999971 | 0.6817300319999973 | 0.4673556090000019 | F | F | F |
| 0.4166666870000029 | 0.1817300920000022 | 0.4673556090000019 | F | F | F |
| 0.4166666870000029 | 0.6817300319999973 | 0.4673556090000019 | F | F | F |
| 0.7500000000000000 | 0.1817300920000022 | 0.4673556090000019 | F | F | F |
| 0.7500000000000000 | 0.6817300319999973 | 0.4673556090000019 | F | F | F |
| 0.2500000000000000 | 0.3182699680000027 | 0.5326443909999981 | F | F | F |
| 0.2500000000000000 | 0.8182699079999978 | 0.5326443909999981 | F | F | F |
| 0.5833333129999971 | 0.3182699680000027 | 0.5326443909999981 | F | F | F |
| 0.5833333129999971 | 0.8182699079999978 | 0.5326443909999981 | F | F | F |
| 0.9166666870000029 | 0.3182699680000027 | 0.5326443909999981 | F | F | F |
| 0.9166666870000029 | 0.8182699079999978 | 0.5326443909999981 | F | F | F |
| 0.0827631416904537 | 0.4499038196288159 | 0.5995332168608544 | T | T | T |
| 0.0810721782840843 | 0.9497541138669255 | 0.5995160298248208 | T | T | T |
| 0.4212752807964509 | 0.4521035518264276 | 0.5990847235501252 | T | T | T |
| 0.4139956495969830 | 0.9495760196753266 | 0.5994421340229374 | T | T | T |
| 0.7531062456247003 | 0.4503632386931866 | 0.5996162693935999 | T | T | T |
| 0.7481454543404056 | 0.9503766596621527 | 0.5994286092057201 | T | T | T |
| 0.5337018604977529 | 0.6961746988133140 | 0.3285639425152461 | T | T | T |
| 0.4918919013864757 | 0.3712789674448385 | 0.3581426977952110 | T | T | T |
| 0.8152686296497830 | 0.3730242202209169 | 0.3625722724145251 | T | T | T |
| 0.7531939078503457 | 0.0515031793629257 | 0.3342565318713883 | T | T | T |
| 0.0807720786500148 | 0.5483762979419686 | 0.3347941471297932 | T | T | T |
| 0.1249785489887296 | 0.3730945908403072 | 0.3668263175499532 | T | T | T |
| 0.0265668637864693 | 0.8734169127650213 | 0.3640226808337726 | T | T | T |
| 0.4217840025190000 | 0.0411402225725348 | 0.3353896962097896 | T | T | T |
| 0.3286449896004518 | 0.8598414297714696 | 0.3570164565489752 | T | T | T |
| 0.0870121403233969 | 0.0488104453931236 | 0.3345938505087979 | T | T | T |
| 0.7081030694362559 | 0.8767226443984142 | 0.3658634948363404 | T | T | T |
| 0.2496856723466316 | 0.3073303092354586 | 0.3996808140543706 | T | T | T |
| 0.2439959950484171 | 0.8040669960264341 | 0.4012552369216549 | T | T | T |
| 0.5832982328741966 | 0.3003158985132576 | 0.4012458271812641 | T | T | T |
| 0.5825314931964091 | 0.8122645253134696 | 0.3984394105829958 | T | T | T |
| 0.9186934408976724 | 0.2949428755140608 | 0.4037906767653279 | T | T | T |
| 0.9160175006972322 | 0.8050853552977127 | 0.4013591066639762 | T | T | T |
| 0.0833333129999971 | 0.4317300920000022 | 0.4673556090000019 | F | F | F |
| 0.0833333129999971 | 0.9317300920000022 | 0.4673556090000019 | F | F | F |
| 0.4166666870000029 | 0.4317300920000022 | 0.4673556090000019 | F | F | F |
| 0.4166666870000029 | 0.9317300920000022 | 0.4673556090000019 | F | F | F |
| 0.7500000000000000 | 0.4317300920000022 | 0.4673556090000019 | F | F | F |
| 0.7500000000000000 | 0.9317300920000022 | 0.4673556090000019 | F | F | F |
| 0.2500000000000000 | 0.0682699079999978 | 0.5326443909999981 | F | F | F |
| 0.2500000000000000 | 0.5682699079999978 | 0.5326443909999981 | F | F | F |
| 0.5833333129999971 | 0.0682699079999978 | 0.5326443909999981 | F | F | F |
| 0.5833333129999971 | 0.5682699079999978 | 0.5326443909999981 | F | F | F |
| 0.9166666870000029 | 0.0682699079999978 | 0.5326443909999981 | F | F | F |
| 0.9166666870000029 | 0.5682699079999978 | 0.5326443909999981 | F | F | F |
| 0.0839824993027680 | 0.1949146447022872 | 0.5986408933360230 | T | T | T |
| 0.0813065591023275 | 0.7050571244859396 | 0.5962093232346716 | T | T | T |
| 0.4174685068035917 | 0.1877354746865312 | 0.6015605894170118 | T | T | T |
| 0.4167017671258030 | 0.6996841014867414 | 0.5987541728187359 | T | T | T |
| 0.7560040049515830 | 0.1959330039735658 | 0.5987447630783452 | T | T | T |
| 0.7503143276533683 | 0.6926696907645418 | 0.6003191859456292 | T | T | T |
| 0.2918969305637443 | 0.1232773556015863 | 0.6341365051636594 | T | T | T |
| 0.9129878596766038 | 0.9511895546068763 | 0.6654061494912019 | T | T | T |
| 0.6713550103995476 | 0.1401585702285302 | 0.6429835434510248 | T | T | T |

|                    |                    |                    |   |   |   |
|--------------------|--------------------|--------------------|---|---|---|
| 0.5782159974809998 | 0.9588597774274649 | 0.6646103037902097 | T | T | T |
| 0.9734331362135308 | 0.1265830872349786 | 0.6359773191662279 | T | T | T |
| 0.8750214510112632 | 0.6269054091596924 | 0.6331736824500471 | T | T | T |
| 0.9192279213499850 | 0.4516237020580315 | 0.6652058528702074 | T | T | T |
| 0.2468060921496615 | 0.9484968206370750 | 0.6657434681286127 | T | T | T |
| 0.1847313703502165 | 0.6269757797790834 | 0.6374277275854746 | T | T | T |
| 0.5081080986135241 | 0.6287210325551617 | 0.6418573022047893 | T | T | T |
| 0.4662981395022466 | 0.3038253011866862 | 0.6714360574847545 | T | T | T |
| 0.7379022276788996 | 0.6676482956169021 | 0.3297226350773710 | T | T | T |
| 0.4183298222680464 | 0.6911691547206645 | 0.3357236265082304 | T | T | T |
| 0.4150777731775321 | 0.5726925921335638 | 0.3587907488821801 | T | T | T |
| 0.7458815705755348 | 0.5866789439497401 | 0.3627850182070974 | T | T | T |
| 0.2364210641927884 | 0.3834793251120165 | 0.3760884192272905 | T | T | T |
| 0.5853603580889651 | 0.3817097973264990 | 0.3768869885493609 | T | T | T |
| 0.7526183707666836 | 0.1002237304008647 | 0.3616474526619707 | T | T | T |
| 0.0816492181554820 | 0.5998112846312782 | 0.3615546841753276 | T | T | T |
| 0.4189788078714475 | 0.0956854000069120 | 0.3612848254649873 | T | T | T |
| 0.2408967901975390 | 0.8830976142483656 | 0.3765455503892473 | T | T | T |
| 0.0851790223561911 | 0.0991100689181201 | 0.3616004497641294 | T | T | T |
| 0.5971864741002485 | 0.8867542669228404 | 0.3754056012887524 | T | T | T |
| 0.9182782623544169 | 0.3846542447957335 | 0.3769671042498330 | T | T | T |
| 0.9198682896452115 | 0.8845331128041940 | 0.3766889088482313 | T | T | T |
| 0.2512352971368940 | 0.2077498667387888 | 0.4268219168879888 | T | T | T |
| 0.2500627472703277 | 0.7082098824581542 | 0.426522353796427  | T | T | T |
| 0.5833433907496467 | 0.2081653061313562 | 0.4268713987700329 | T | T | T |
| 0.5814724588068875 | 0.7071929900576422 | 0.4261543356406366 | T | T | T |
| 0.9172811610464795 | 0.2092185705428764 | 0.4266676135773301 | T | T | T |
| 0.9161488289742742 | 0.7089546063681510 | 0.4265709411308378 | T | T | T |
| 0.0844799818810220 | 0.0199501144239063 | 0.4420593076299257 | T | T | T |
| 0.0818495688598908 | 0.5202956666097033 | 0.4419180656643861 | T | T | T |
| 0.4185117255863354 | 0.0191829320604365 | 0.4419227177599066 | T | T | T |
| 0.4139144893008175 | 0.5191257212359252 | 0.4418779844710527 | T | T | T |
| 0.7520533886024392 | 0.0201107433761468 | 0.4420221143469419 | T | T | T |
| 0.7492858002527586 | 0.5196984865582499 | 0.4418389023264999 | T | T | T |
| 0.0833333129999971 | 0.3437488080000008 | 0.4914442899999969 | F | F | F |
| 0.0833333129999971 | 0.8437487779999984 | 0.4914442899999969 | F | F | F |
| 0.4166666870000029 | 0.3437488080000008 | 0.4914442899999969 | F | F | F |
| 0.4166666870000029 | 0.8437487779999984 | 0.4914442899999969 | F | F | F |
| 0.7500000000000000 | 0.3437488080000008 | 0.4914442899999969 | F | F | F |
| 0.7500000000000000 | 0.8437487779999984 | 0.4914442899999969 | F | F | F |
| 0.2500000000000000 | 0.1562512220000016 | 0.5085557100000031 | F | F | F |
| 0.2500000000000000 | 0.6562511919999992 | 0.5085557100000031 | F | F | F |
| 0.5833333129999971 | 0.1562512220000016 | 0.5085557100000031 | F | F | F |
| 0.5833333129999971 | 0.6562511919999992 | 0.5085557100000031 | F | F | F |
| 0.9166666870000029 | 0.1562512220000016 | 0.5085557100000031 | F | F | F |
| 0.9166666870000029 | 0.6562511919999992 | 0.5085557100000031 | F | F | F |
| 0.2507141997472412 | 0.4803015134417501 | 0.5581610976735001 | T | T | T |
| 0.2479466113975615 | 0.9798892566238540 | 0.5579778856530576 | T | T | T |
| 0.5860855106991827 | 0.4808742787640747 | 0.5581220155289471 | T | T | T |
| 0.5814882744136640 | 0.9808170679395635 | 0.5580772822400937 | T | T | T |
| 0.9181504311401086 | 0.4797043333902972 | 0.5580819343356146 | T | T | T |
| 0.9155200181189780 | 0.9800498855760936 | 0.5579406923700738 | T | T | T |
| 0.0838511710257250 | 0.2910453936318487 | 0.5734290588691622 | T | T | T |
| 0.0827188389535201 | 0.7907814294571237 | 0.5733323864226700 | T | T | T |
| 0.4185275411931130 | 0.2928070099423568 | 0.5738456643593632 | T | T | T |
| 0.4166566092503532 | 0.7918346938686445 | 0.5731286012299671 | T | T | T |
| 0.7499372527296724 | 0.2917901175418455 | 0.5734777646203576 | T | T | T |
| 0.7487647028631060 | 0.7922501332612115 | 0.5731780831120118 | T | T | T |
| 0.0801317103547881 | 0.1154668871958128 | 0.6233110911517692 | T | T | T |
| 0.0817217376455830 | 0.6153457552042664 | 0.6230328957501673 | T | T | T |
| 0.4028135258997509 | 0.1132457330771599 | 0.6245943987112480 | T | T | T |
| 0.9148209776438087 | 0.9008899310818730 | 0.6383995502358709 | T | T | T |
| 0.7591032098024608 | 0.1169023857516340 | 0.6234544496107522 | T | T | T |

|                    |                    |                    |   |   |   |
|--------------------|--------------------|--------------------|---|---|---|
| 0.5810211921285521 | 0.9043145999930887 | 0.6387151745350129 | T | T | T |
| 0.9183507818445179 | 0.4001887153687222 | 0.6384453158246658 | T | T | T |
| 0.2473816292333089 | 0.8997762695991358 | 0.6383525473380295 | T | T | T |
| 0.4146396419110347 | 0.6182902026735013 | 0.6231130114506387 | T | T | T |
| 0.7635789358072113 | 0.6165206748879830 | 0.6239115807727097 | T | T | T |
| 0.2541184294244657 | 0.4133210560502596 | 0.6372149817929029 | T | T | T |
| 0.5849222268224679 | 0.4273074078664371 | 0.6412092511178197 | T | T | T |
| 0.5816701777319536 | 0.3088308452793353 | 0.6642763734917692 | T | T | T |
| 0.2620977723211014 | 0.3323517043830977 | 0.6702773649226290 | T | T | T |

5'''

|                    |                     |                     |  |  |  |
|--------------------|---------------------|---------------------|--|--|--|
| 1.0000000000000000 |                     |                     |  |  |  |
| 8.5086002349999994 | 0.0000000000000000  | 0.0000000000000000  |  |  |  |
| 0.0000000000000000 | 10.8548107146999993 | 0.0000000000000000  |  |  |  |
| 0.0000000000000000 | 0.0000000000000000  | 30.0000000000000000 |  |  |  |

Co H O

24 46 64

Selective dynamics

Direct

|                    |                    |                    |   |   |   |
|--------------------|--------------------|--------------------|---|---|---|
| 0.5850081002261618 | 0.5522924082561076 | 0.3998127294839904 | T | T | T |
| 0.2520073537516794 | 0.5535272477311395 | 0.3995532851590156 | T | T | T |
| 0.5813284699387467 | 0.0446187296029379 | 0.3998264331020991 | T | T | T |
| 0.2476694591893747 | 0.0451576266988454 | 0.3999131304558716 | T | T | T |
| 0.9143954677842814 | 0.0484901394904398 | 0.4007823937931789 | T | T | T |
| 0.9186968427890676 | 0.5517405913013107 | 0.4005135566587512 | T | T | T |
| 0.0833333129999971 | 0.1817300920000022 | 0.4673556090000019 | F | F | F |
| 0.0833333129999971 | 0.6817300319999973 | 0.4673556090000019 | F | F | F |
| 0.4166666870000029 | 0.1817300920000022 | 0.4673556090000019 | F | F | F |
| 0.4166666870000029 | 0.6817300319999973 | 0.4673556090000019 | F | F | F |
| 0.7500000000000000 | 0.1817300920000022 | 0.4673556090000019 | F | F | F |
| 0.7500000000000000 | 0.6817300319999973 | 0.4673556090000019 | F | F | F |
| 0.2500000000000000 | 0.3182699680000027 | 0.5326443909999981 | F | F | F |
| 0.2500000000000000 | 0.8182699079999978 | 0.5326443909999981 | F | F | F |
| 0.5833333129999971 | 0.3182699680000027 | 0.5326443909999981 | F | F | F |
| 0.5833333129999971 | 0.8182699079999978 | 0.5326443909999981 | F | F | F |
| 0.9166666870000029 | 0.3182699680000027 | 0.5326443909999981 | F | F | F |
| 0.9166666870000029 | 0.8182699079999978 | 0.5326443909999981 | F | F | F |
| 0.0813031572109253 | 0.4482594086986893 | 0.5994864433412488 | T | T | T |
| 0.0856045322157186 | 0.9515098605095602 | 0.5992176062068282 | T | T | T |
| 0.7523305408106324 | 0.9548423733011546 | 0.6000868695441284 | T | T | T |
| 0.4186715300612533 | 0.9553812703970621 | 0.6001735668979009 | T | T | T |
| 0.7479926462483206 | 0.4464727522688534 | 0.6004467148409844 | T | T | T |
| 0.4149918997738453 | 0.4477075917438924 | 0.6001872705160167 | T | T | T |
| 0.3878679674637624 | 0.3611439315191021 | 0.3271849111594491 | T | T | T |
| 0.4201183943923397 | 0.5509364180525509 | 0.3350894610094599 | T | T | T |
| 0.7491727303572517 | 0.5348817798311032 | 0.3370545276511976 | T | T | T |
| 0.7478419642349650 | 0.0450755063478283 | 0.3343959393254536 | T | T | T |
| 0.0852231646417394 | 0.5553677330506090 | 0.3341865408013831 | T | T | T |
| 0.0482988705070824 | 0.3796210594374472 | 0.3715676798113208 | T | T | T |
| 0.1442395286669012 | 0.8683025988209749 | 0.3621557529102262 | T | T | T |
| 0.4123190249270081 | 0.0430616021913366 | 0.3338763716398745 | T | T | T |
| 0.4825635217320041 | 0.8677164755986198 | 0.3615390456097103 | T | T | T |
| 0.0773046301963234 | 0.0446007819238048 | 0.3345439322203703 | T | T | T |
| 0.8044213761508416 | 0.8711532025346642 | 0.3636372506773924 | T | T | T |
| 0.2543985194538863 | 0.2786682754386263 | 0.4035168688133552 | T | T | T |
| 0.2518498860689320 | 0.8005791434398120 | 0.4021314909531313 | T | T | T |
| 0.5825705545217872 | 0.2772823255691037 | 0.4046080657987545 | T | T | T |
| 0.5859394328867111 | 0.7964865119515423 | 0.4033587214400143 | T | T | T |
| 0.9100054929985149 | 0.3152277238609003 | 0.3973835746355192 | T | T | T |
| 0.9182599448992335 | 0.8060767272566309 | 0.4000782962874254 | T | T | T |
| 0.0833333129999971 | 0.4317300920000022 | 0.4673556090000019 | F | F | F |
| 0.0833333129999971 | 0.9317300920000022 | 0.4673556090000019 | F | F | F |
| 0.4166666870000029 | 0.4317300920000022 | 0.4673556090000019 | F | F | F |

|                    |                    |                    |   |   |   |
|--------------------|--------------------|--------------------|---|---|---|
| 0.4166666870000029 | 0.9317300920000022 | 0.4673556090000019 | F | F | F |
| 0.7500000000000000 | 0.4317300920000022 | 0.4673556090000019 | F | F | F |
| 0.7500000000000000 | 0.9317300920000022 | 0.4673556090000019 | F | F | F |
| 0.2500000000000000 | 0.0682699079999978 | 0.5326443909999981 | F | F | F |
| 0.2500000000000000 | 0.5682699079999978 | 0.5326443909999981 | F | F | F |
| 0.5833333129999971 | 0.0682699079999978 | 0.5326443909999981 | F | F | F |
| 0.5833333129999971 | 0.5682699079999978 | 0.5326443909999981 | F | F | F |
| 0.9166666870000029 | 0.0682699079999978 | 0.5326443909999981 | F | F | F |
| 0.9166666870000029 | 0.5682699079999978 | 0.5326443909999981 | F | F | F |
| 0.0817400551007665 | 0.1939232727433691 | 0.5999217037125675 | T | T | T |
| 0.0899945070014851 | 0.6847722761390997 | 0.6026164253644808 | T | T | T |
| 0.4140605671132889 | 0.2035134880484506 | 0.5966412785599857 | T | T | T |
| 0.4174294454782128 | 0.7227176744309034 | 0.5953919342012455 | T | T | T |
| 0.7481501139310680 | 0.1994208565601880 | 0.5978685090468687 | T | T | T |
| 0.7456014805461137 | 0.7213317245613737 | 0.5964831311866448 | T | T | T |
| 0.1955786238491584 | 0.1288467974653358 | 0.6363627493226076 | T | T | T |
| 0.9226953698036766 | 0.9553992180761952 | 0.6654560677796297 | T | T | T |
| 0.5174364782679959 | 0.1322835244013802 | 0.6384609543902897 | T | T | T |
| 0.5876809750729919 | 0.9569383978086634 | 0.6661236283601255 | T | T | T |
| 0.8557604713330988 | 0.1316974011790251 | 0.6378442470897738 | T | T | T |
| 0.9517011294929176 | 0.6203789405625528 | 0.6284323201886792 | T | T | T |
| 0.9147768353582606 | 0.4446322669493981 | 0.6658134591986169 | T | T | T |
| 0.2521580357650350 | 0.9549244936521717 | 0.6656040606745464 | T | T | T |
| 0.2508272696427554 | 0.4651182201688897 | 0.6629454723488024 | T | T | T |
| 0.5798816056076603 | 0.4490635819474491 | 0.6649105389905401 | T | T | T |
| 0.6121320325362376 | 0.6388560684808979 | 0.6728150888405509 | T | T | T |
| 0.5782440492902836 | 0.3861760442380273 | 0.3325337623870439 | T | T | T |
| 0.2719954524200858 | 0.3810481646869022 | 0.3284775505273103 | T | T | T |
| 0.4192562750938080 | 0.6041876057168807 | 0.3615198630819094 | T | T | T |
| 0.7520441438560752 | 0.5968394637929677 | 0.3609121291232213 | T | T | T |
| 0.2441673678002019 | 0.3911989152603041 | 0.3760553426859659 | T | T | T |
| 0.5813635411165876 | 0.3954899722948326 | 0.3771586897577208 | T | T | T |
| 0.7476006976258134 | 0.0945532174044459 | 0.3616212464362150 | T | T | T |
| 0.0844627615107356 | 0.6040560073421517 | 0.3616193734816093 | T | T | T |
| 0.4146400889411197 | 0.0921838184750143 | 0.3611738691901252 | T | T | T |
| 0.2473903298656523 | 0.8817685526176362 | 0.3762017215480284 | T | T | T |
| 0.0812939611902195 | 0.0945622321908601 | 0.3616287857118508 | T | T | T |
| 0.5843063716919943 | 0.8818322845576958 | 0.3762676114128638 | T | T | T |
| 0.9314704434097791 | 0.3879214776792281 | 0.3751567501602864 | T | T | T |
| 0.9116686550202360 | 0.8826956330127231 | 0.3756681951499061 | T | T | T |
| 0.2508921032664020 | 0.2060986581491449 | 0.4259129163904234 | T | T | T |
| 0.2511226441507617 | 0.7106207208701179 | 0.4272175074709637 | T | T | T |
| 0.5827549395152261 | 0.2051130662273124 | 0.4260959776345885 | T | T | T |
| 0.5843763108473681 | 0.7104886076705839 | 0.4270874426061511 | T | T | T |
| 0.9152726866815186 | 0.2072983543224396 | 0.4269332378698678 | T | T | T |
| 0.9167215090258125 | 0.7094705887829704 | 0.4270706215215938 | T | T | T |
| 0.0822879741627176 | 0.0190439974315026 | 0.4421354261279546 | T | T | T |
| 0.0855126688136494 | 0.5203181140506672 | 0.4417723222736427 | T | T | T |
| 0.4150162935122594 | 0.0185154467840931 | 0.4419645992819241 | T | T | T |
| 0.4177659156120654 | 0.5202477624875002 | 0.4416554707821803 | T | T | T |
| 0.7479402055605036 | 0.0188336753989162 | 0.4421673975056564 | T | T | T |
| 0.7507834755243508 | 0.5196259673013799 | 0.4417769802896885 | T | T | T |
| 0.0833333129999971 | 0.3437488080000008 | 0.4914442899999969 | F | F | F |
| 0.0833333129999971 | 0.8437487779999984 | 0.4914442899999969 | F | F | F |
| 0.4166666870000029 | 0.3437488080000008 | 0.4914442899999969 | F | F | F |
| 0.4166666870000029 | 0.8437487779999984 | 0.4914442899999969 | F | F | F |
| 0.7500000000000000 | 0.3437488080000008 | 0.4914442899999969 | F | F | F |
| 0.7500000000000000 | 0.8437487779999984 | 0.4914442899999969 | F | F | F |
| 0.2500000000000000 | 0.1562512220000016 | 0.5085557100000031 | F | F | F |
| 0.2500000000000000 | 0.6562511919999992 | 0.5085557100000031 | F | F | F |
| 0.5833333129999971 | 0.1562512220000016 | 0.5085557100000031 | F | F | F |
| 0.5833333129999971 | 0.6562511919999992 | 0.5085557100000031 | F | F | F |
| 0.9166666870000029 | 0.1562512220000016 | 0.5085557100000031 | F | F | F |



|                    |                    |                    |   |   |   |
|--------------------|--------------------|--------------------|---|---|---|
| 0.9166666870000029 | 0.6562511919999992 | 0.5085557100000031 | F | F | F |
| 0.2492165244756492 | 0.4803740326986201 | 0.5582230197103115 | T | T | T |
| 0.2520597944394964 | 0.9811663246010838 | 0.5578326024943436 | T | T | T |
| 0.5822340843879417 | 0.4797522375124998 | 0.5583445292178197 | T | T | T |
| 0.5849837064877406 | 0.9814845532159069 | 0.5580354007180759 | T | T | T |
| 0.9144873311863506 | 0.4796818859493328 | 0.5582276777263573 | T | T | T |
| 0.9177120258372824 | 0.9809560025684974 | 0.5578645738720454 | T | T | T |
| 0.0832784909741875 | 0.2905294112170296 | 0.5729293784784062 | T | T | T |
| 0.0847273133184814 | 0.7927016456775604 | 0.5730667621301322 | T | T | T |
| 0.4156236891526248 | 0.2895113923294161 | 0.5729125573938489 | T | T | T |
| 0.4172450604847739 | 0.7948869337726876 | 0.5739040223654115 | T | T | T |
| 0.7488773558492383 | 0.2893792791298821 | 0.5727824925290363 | T | T | T |
| 0.7491078967335980 | 0.7939013418508551 | 0.5740870836095766 | T | T | T |
| 0.0883313449797640 | 0.1173043669872769 | 0.6243318048500939 | T | T | T |
| 0.0685295565902209 | 0.6120785223207719 | 0.6248432498397136 | T | T | T |
| 0.4156936283080128 | 0.1181677154423042 | 0.6237323885871362 | T | T | T |
| 0.9187060388097805 | 0.9054377678091399 | 0.6383712142881492 | T | T | T |
| 0.7526096701343477 | 0.1182314473823638 | 0.6237982784519716 | T | T | T |
| 0.5853599110588803 | 0.9078161815249857 | 0.6388261308098748 | T | T | T |
| 0.9155372384892644 | 0.3959439926578483 | 0.6383806265183907 | T | T | T |
| 0.2523993023741866 | 0.9054467825955541 | 0.6383787535637850 | T | T | T |
| 0.4186364588834124 | 0.6045100277051674 | 0.6228413102422792 | T | T | T |
| 0.7558326321997981 | 0.6088010847396959 | 0.6239446573140341 | T | T | T |
| 0.2479558561439248 | 0.4031605362070323 | 0.6390878708767787 | T | T | T |
| 0.5807437249061920 | 0.3958123942831193 | 0.6384801369180906 | T | T | T |
| 0.7280045475799213 | 0.6189518353130978 | 0.6715224494726897 | T | T | T |
| 0.4217559507097164 | 0.6138239557619727 | 0.6674662376129561 | T | T | T |

6

|                    |                     |                     |
|--------------------|---------------------|---------------------|
| 1.0000000000000000 |                     |                     |
| 8.5086002349999994 | 0.0000000000000000  | 0.0000000000000000  |
| 0.0000000000000000 | 10.8548107146999993 | 0.0000000000000000  |
| 0.0000000000000000 | 0.0000000000000000  | 30.0000000000000000 |

Co H O

24 44 64

Selective dynamics

Direct

|                    |                    |                    |   |   |   |
|--------------------|--------------------|--------------------|---|---|---|
| 0.5864981862879123 | 0.5479723663311026 | 0.4001010560048662 | T | T | T |
| 0.2467681155873575 | 0.5532275666528855 | 0.4009352163389012 | T | T | T |
| 0.5850275478828316 | 0.0487457302506976 | 0.4008272053983808 | T | T | T |
| 0.2521801082458276 | 0.0451377715948795 | 0.3998000887497982 | T | T | T |
| 0.9181943844111539 | 0.0469993445317966 | 0.4001814938797441 | T | T | T |
| 0.9176494005135121 | 0.5504728143314668 | 0.4002096959584271 | T | T | T |
| 0.0833333129999971 | 0.1817300920000022 | 0.4673556090000019 | F | F | F |
| 0.0833333129999971 | 0.6817300319999973 | 0.4673556090000019 | F | F | F |
| 0.4166666870000029 | 0.1817300920000022 | 0.4673556090000019 | F | F | F |
| 0.4166666870000029 | 0.6817300319999973 | 0.4673556090000019 | F | F | F |
| 0.7500000000000000 | 0.1817300920000022 | 0.4673556090000019 | F | F | F |
| 0.7500000000000000 | 0.6817300319999973 | 0.4673556090000019 | F | F | F |
| 0.2500000000000000 | 0.3182699680000027 | 0.5326443909999981 | F | F | F |
| 0.2500000000000000 | 0.8182699079999978 | 0.5326443909999981 | F | F | F |
| 0.5833333129999971 | 0.3182699680000027 | 0.5326443909999981 | F | F | F |
| 0.5833333129999971 | 0.8182699079999978 | 0.5326443909999981 | F | F | F |
| 0.9166666870000029 | 0.3182699680000027 | 0.5326443909999981 | F | F | F |
| 0.9166666870000029 | 0.8182699079999978 | 0.5326443909999981 | F | F | F |
| 0.0823505994864879 | 0.4495271856685403 | 0.5997903040415730 | T | T | T |
| 0.0818056155888461 | 0.9530006554682035 | 0.5998185061202559 | T | T | T |
| 0.7478198917541724 | 0.9548622284051205 | 0.6001999112502018 | T | T | T |
| 0.4149724521171684 | 0.9512542697493025 | 0.5991727946016192 | T | T | T |
| 0.7532318844126425 | 0.4467724333471145 | 0.5990647836610988 | T | T | T |
| 0.4135018137120877 | 0.4520276336688904 | 0.5998989439951338 | T | T | T |
| 0.7516377650916927 | 0.5487786690114592 | 0.3345865818349115 | T | T | T |
| 0.7215474151605995 | 0.3765405634132238 | 0.3705866900941889 | T | T | T |

|                    |                    |                    |   |   |   |
|--------------------|--------------------|--------------------|---|---|---|
| 0.7522908902958380 | 0.0455795116202941 | 0.3347739384953392 | T | T | T |
| 0.0960147946146840 | 0.5455849735893054 | 0.3356118703431872 | T | T | T |
| 0.9781690138059094 | 0.3695749207788315 | 0.3519531705655208 | T | T | T |
| 0.0135280294324462 | 0.8682812290071102 | 0.3604888088354069 | T | T | T |
| 0.4222160839946109 | 0.0438823823749526 | 0.3344565572153819 | T | T | T |
| 0.3610836629920924 | 0.8706598315821749 | 0.3634929300758238 | T | T | T |
| 0.0864859740677816 | 0.0430868130271625 | 0.3339469535351643 | T | T | T |
| 0.6918765968854143 | 0.8701872371133171 | 0.3631450303414800 | T | T | T |
| 0.2598279373221308 | 0.2748349218140603 | 0.4033912960694517 | T | T | T |
| 0.2483470368519006 | 0.8025605306447620 | 0.4018328858937419 | T | T | T |
| 0.5818664985084240 | 0.3136090320112457 | 0.3972410670858717 | T | T | T |
| 0.5817850176815585 | 0.8033271371558498 | 0.4009655362689925 | T | T | T |
| 0.9193868076833646 | 0.2901604802927378 | 0.4039697105572223 | T | T | T |
| 0.9141603423000635 | 0.7988813302258801 | 0.4023180336246899 | T | T | T |
| 0.0833333129999971 | 0.4317300920000022 | 0.4673556090000019 | F | F | F |
| 0.0833333129999971 | 0.9317300920000022 | 0.4673556090000019 | F | F | F |
| 0.4166666870000029 | 0.4317300920000022 | 0.4673556090000019 | F | F | F |
| 0.4166666870000029 | 0.9317300920000022 | 0.4673556090000019 | F | F | F |
| 0.7500000000000000 | 0.4317300920000022 | 0.4673556090000019 | F | F | F |
| 0.7500000000000000 | 0.9317300920000022 | 0.4673556090000019 | F | F | F |
| 0.2500000000000000 | 0.0682699079999978 | 0.5326443909999981 | F | F | F |
| 0.2500000000000000 | 0.5682699079999978 | 0.5326443909999981 | F | F | F |
| 0.5833333129999971 | 0.0682699079999978 | 0.5326443909999981 | F | F | F |
| 0.5833333129999971 | 0.5682699079999978 | 0.5326443909999981 | F | F | F |
| 0.9166666870000029 | 0.0682699079999978 | 0.5326443909999981 | F | F | F |
| 0.9166666870000029 | 0.5682699079999978 | 0.5326443909999981 | F | F | F |
| 0.0858396576999365 | 0.2011186697741198 | 0.5976819663753101 | T | T | T |
| 0.0806131923166355 | 0.7098395197072621 | 0.5960302894427778 | T | T | T |
| 0.4182149823184415 | 0.1966728628441574 | 0.5990344637310075 | T | T | T |
| 0.4181335014915760 | 0.6863909679887542 | 0.6027589329141283 | T | T | T |
| 0.7516529631480995 | 0.1974394693552380 | 0.5981671141062581 | T | T | T |
| 0.7401720626778693 | 0.7251650781859398 | 0.5966087039305483 | T | T | T |
| 0.3081234031145786 | 0.1298127628866828 | 0.6368549696585201 | T | T | T |
| 0.9135140259322184 | 0.9569131869728374 | 0.6660530464648428 | T | T | T |
| 0.6389163370079076 | 0.1293401684178252 | 0.6365070699241762 | T | T | T |
| 0.5777839160053890 | 0.9561176176250473 | 0.6655434427846181 | T | T | T |
| 0.9864719705675538 | 0.1317187709928826 | 0.6395111911645931 | T | T | T |
| 0.0218309861940906 | 0.6304250792211685 | 0.6480468294344792 | T | T | T |
| 0.9039852053853160 | 0.4544150264106946 | 0.6643881296568128 | T | T | T |
| 0.2477091097041620 | 0.9544204883797059 | 0.6652260615046608 | T | T | T |
| 0.2784525848394004 | 0.6234594365867762 | 0.6294133099058111 | T | T | T |
| 0.2483622349083073 | 0.4512213309885407 | 0.6654134181650885 | T | T | T |
| 0.4067881876070085 | 0.5452140686289025 | 0.3192462219626495 | T | T | T |
| 0.2676739717336967 | 0.4102811660884330 | 0.3298662266191844 | T | T | T |
| 0.4212512095352743 | 0.5925038070180794 | 0.3602655543283985 | T | T | T |
| 0.7514886213028759 | 0.5998700146650618 | 0.3614330911198734 | T | T | T |
| 0.2765322296464359 | 0.4003093708329616 | 0.3738353358201746 | T | T | T |
| 0.6044556014327562 | 0.3856742575175298 | 0.3750540749086704 | T | T | T |
| 0.7517593882056681 | 0.0963520290377782 | 0.3616833476458949 | T | T | T |
| 0.0832329112353323 | 0.6001298787328275 | 0.3614803878099968 | T | T | T |
| 0.4181324345349910 | 0.0942381026847383 | 0.3614426165221472 | T | T | T |
| 0.2547115885312331 | 0.8820749411855043 | 0.3759615325462658 | T | T | T |
| 0.0852448478406496 | 0.0930549137695825 | 0.3610438031488722 | T | T | T |
| 0.5862428725079678 | 0.8821570046165504 | 0.3761063242838220 | T | T | T |
| 0.9107471705124462 | 0.3846503787477517 | 0.3776260434052822 | T | T | T |
| 0.9144829229717536 | 0.8822948936659034 | 0.3765064893531619 | T | T | T |
| 0.2507412009703508 | 0.2063420875223543 | 0.4256101617242182 | T | T | T |
| 0.2494167195967056 | 0.7115306740732518 | 0.4273332339594772 | T | T | T |
| 0.5822375131757458 | 0.2069505097727896 | 0.4270388726448774 | T | T | T |
| 0.5819655939085593 | 0.7079269272350218 | 0.4265491595663409 | T | T | T |
| 0.9177875401736153 | 0.2072284168906275 | 0.4264390999450507 | T | T | T |
| 0.9164058051554742 | 0.7091506680897282 | 0.4267711316505345 | T | T | T |
| 0.0850734803062770 | 0.0189065290995861 | 0.4419250430000176 | T | T | T |

|                    |                    |                    |   |   |   |
|--------------------|--------------------|--------------------|---|---|---|
| 0.0833165604577104 | 0.5203563767033313 | 0.4420798098768546 | T | T | T |
| 0.4172106885027605 | 0.0189317584739736 | 0.4420547309050957 | T | T | T |
| 0.4165384635168243 | 0.5195953328641915 | 0.4416741464297578 | T | T | T |
| 0.7517135996951663 | 0.0194132791818318 | 0.4421476895080649 | T | T | T |
| 0.7517652361475993 | 0.5203634198351235 | 0.4422211665095976 | T | T | T |
| 0.0833333129999971 | 0.3437488080000008 | 0.4914442899999969 | F | F | F |
| 0.0833333129999971 | 0.8437487779999984 | 0.4914442899999969 | F | F | F |
| 0.4166666870000029 | 0.3437488080000008 | 0.4914442899999969 | F | F | F |
| 0.4166666870000029 | 0.8437487779999984 | 0.4914442899999969 | F | F | F |
| 0.7500000000000000 | 0.3437488080000008 | 0.4914442899999969 | F | F | F |
| 0.7500000000000000 | 0.8437487779999984 | 0.4914442899999969 | F | F | F |
| 0.2500000000000000 | 0.1562512220000016 | 0.5085557100000031 | F | F | F |
| 0.2500000000000000 | 0.6562511919999992 | 0.5085557100000031 | F | F | F |
| 0.5833333129999971 | 0.1562512220000016 | 0.5085557100000031 | F | F | F |
| 0.5833333129999971 | 0.6562511919999992 | 0.5085557100000031 | F | F | F |
| 0.9166666870000029 | 0.1562512220000016 | 0.5085557100000031 | F | F | F |
| 0.9166666870000029 | 0.6562511919999992 | 0.5085557100000031 | F | F | F |
| 0.248234766824008  | 0.4796365801648765 | 0.5577788334904025 | T | T | T |
| 0.2482864003048337 | 0.9805867208181681 | 0.5578523104919351 | T | T | T |
| 0.5834615364831757 | 0.4804046671358085 | 0.5583258535702422 | T | T | T |
| 0.5827893114972396 | 0.9810682415260265 | 0.5579452690949043 | T | T | T |
| 0.9166834395422896 | 0.4796436232966687 | 0.5579201901231454 | T | T | T |
| 0.9149265196937230 | 0.9810934709004139 | 0.5580749569999824 | T | T | T |
| 0.0835941948445258 | 0.2908493319102718 | 0.5732288683494655 | T | T | T |
| 0.0822124598263776 | 0.7927715831093725 | 0.5735609000549493 | T | T | T |
| 0.4180344060914407 | 0.2920730727649782 | 0.5734508404336591 | T | T | T |
| 0.4177624868242542 | 0.7930494902272104 | 0.5729611273551225 | T | T | T |
| 0.7505832804032945 | 0.2884693259267482 | 0.5726667660405228 | T | T | T |
| 0.7492587990296492 | 0.7936579124776457 | 0.5743898382757817 | T | T | T |
| 0.0855170770282464 | 0.1177051063340966 | 0.6234935106468381 | T | T | T |
| 0.0892528294875537 | 0.6153496212522482 | 0.6223739565947178 | T | T | T |
| 0.4137571274920322 | 0.1178429953834495 | 0.6238936757161780 | T | T | T |
| 0.9147551521593504 | 0.9069450862304176 | 0.6389561968511277 | T | T | T |
| 0.7452884114687740 | 0.1179250588144956 | 0.6240384674537341 | T | T | T |
| 0.5818675654650161 | 0.9057618973152617 | 0.6385573834778528 | T | T | T |
| 0.9167670887646677 | 0.3998701212671725 | 0.6385196121900032 | T | T | T |
| 0.2482406117943319 | 0.9036479709622217 | 0.6383166523541051 | T | T | T |
| 0.3955443985672509 | 0.6143257424824702 | 0.6249459250913295 | T | T | T |
| 0.7234677703535641 | 0.5996906291670313 | 0.6261646641798253 | T | T | T |
| 0.2485113786971242 | 0.4001299853349382 | 0.6385669088801267 | T | T | T |
| 0.5787487904647257 | 0.4074961929819206 | 0.6397344456716014 | T | T | T |
| 0.7323260282663033 | 0.5897188339115599 | 0.6701337733808157 | T | T | T |
| 0.5932118123929915 | 0.4547859313710975 | 0.6807537780373505 | T | T | T |

6\*

|                    |                     |                     |
|--------------------|---------------------|---------------------|
| 1.0000000000000000 |                     |                     |
| 8.5086002349999994 | 0.0000000000000000  | 0.0000000000000000  |
| 0.0000000000000000 | 10.8548107146999993 | 0.0000000000000000  |
| 0.0000000000000000 | 0.0000000000000000  | 30.0000000000000000 |

Co H O  
24 44 64

Selective dynamics

Direct

|                    |                    |                    |   |   |   |
|--------------------|--------------------|--------------------|---|---|---|
| 0.5877192745962250 | 0.5514674434579374 | 0.4004176503120829 | T | T | T |
| 0.2484764662940327 | 0.5527924240229637 | 0.3996727847227381 | T | T | T |
| 0.5813810263304950 | 0.0496902742613562 | 0.4007027807234220 | T | T | T |
| 0.2481117331942616 | 0.0454525958023716 | 0.3998268126608258 | T | T | T |
| 0.9145039507753503 | 0.0476256913213769 | 0.4002371450442702 | T | T | T |
| 0.9177071939005577 | 0.5509331200970000 | 0.4002542354202546 | T | T | T |
| 0.0833333129999971 | 0.1817300920000022 | 0.4673556090000019 | F | F | F |
| 0.0833333129999971 | 0.6817300319999973 | 0.4673556090000019 | F | F | F |
| 0.4166666870000029 | 0.1817300920000022 | 0.4673556090000019 | F | F | F |
| 0.4166666870000029 | 0.6817300319999973 | 0.4673556090000019 | F | F | F |

|                    |                    |                    |   |   |   |
|--------------------|--------------------|--------------------|---|---|---|
| 0.7500000000000000 | 0.1817300920000022 | 0.4673556090000019 | F | F | F |
| 0.7500000000000000 | 0.6817300319999973 | 0.4673556090000019 | F | F | F |
| 0.2500000000000000 | 0.3182699680000027 | 0.5326443909999981 | F | F | F |
| 0.2500000000000000 | 0.8182699079999978 | 0.5326443909999981 | F | F | F |
| 0.5833333129999971 | 0.3182699680000027 | 0.5326443909999981 | F | F | F |
| 0.5833333129999971 | 0.8182699079999978 | 0.5326443909999981 | F | F | F |
| 0.9166666870000029 | 0.3182699680000027 | 0.5326443909999981 | F | F | F |
| 0.9166666870000029 | 0.8182699079999978 | 0.5326443909999981 | F | F | F |
| 0.0822928060994421 | 0.4490668799030001 | 0.5997457645797452 | T | T | T |
| 0.0854960492246425 | 0.9523743086786229 | 0.5997628549557299 | T | T | T |
| 0.7518882668057386 | 0.9545474041976286 | 0.6001731873391741 | T | T | T |
| 0.4186189736695050 | 0.9503097257386437 | 0.5992972192765779 | T | T | T |
| 0.7515235337059676 | 0.4472075759770363 | 0.6003272152772618 | T | T | T |
| 0.4122807254037750 | 0.4485325565420624 | 0.5995823496879170 | T | T | T |
| 0.7509994505077476 | 0.5540652330007743 | 0.3344929789267659 | T | T | T |
| 0.7155485048057675 | 0.3784630104175993 | 0.3692746369675407 | T | T | T |
| 0.7449371708597374 | 0.0467827619286154 | 0.3345944014623294 | T | T | T |
| 0.0954499472323502 | 0.5413935630651100 | 0.3363231965179356 | T | T | T |
| 0.9795677333682288 | 0.3688858246317512 | 0.3531247719301076 | T | T | T |
| 0.1467702303715135 | 0.8691949264046195 | 0.3616406625057481 | T | T | T |
| 0.4145338156213770 | 0.0478590847262737 | 0.3340176622964814 | T | T | T |
| 0.4735922693123316 | 0.8728311185900439 | 0.3625524417472579 | T | T | T |
| 0.0784294564696667 | 0.0457509037373700 | 0.3339469721219820 | T | T | T |
| 0.8147393669345271 | 0.8692727487314085 | 0.3609693642101151 | T | T | T |
| 0.2518946092011051 | 0.2766313709686766 | 0.4042989280313275 | T | T | T |
| 0.2511344344400943 | 0.8009406998274624 | 0.4023307863023598 | T | T | T |
| 0.5786356816978243 | 0.3162751422707418 | 0.3969996070120989 | T | T | T |
| 0.5858334944389669 | 0.8079781267437844 | 0.3994694327214670 | T | T | T |
| 0.9150470127650436 | 0.2922344591892019 | 0.4036486639147903 | T | T | T |
| 0.9185409966728808 | 0.8027627839157930 | 0.4011442714201431 | T | T | T |
| 0.0833333129999971 | 0.4317300920000022 | 0.4673556090000019 | F | F | F |
| 0.0833333129999971 | 0.9317300920000022 | 0.4673556090000019 | F | F | F |
| 0.4166666870000029 | 0.4317300920000022 | 0.4673556090000019 | F | F | F |
| 0.4166666870000029 | 0.9317300920000022 | 0.4673556090000019 | F | F | F |
| 0.7500000000000000 | 0.4317300920000022 | 0.4673556090000019 | F | F | F |
| 0.7500000000000000 | 0.9317300920000022 | 0.4673556090000019 | F | F | F |
| 0.2500000000000000 | 0.0682699079999978 | 0.5326443909999981 | F | F | F |
| 0.2500000000000000 | 0.5682699079999978 | 0.5326443909999981 | F | F | F |
| 0.5833333129999971 | 0.0682699079999978 | 0.5326443909999981 | F | F | F |
| 0.5833333129999971 | 0.5682699079999978 | 0.5326443909999981 | F | F | F |
| 0.9166666870000029 | 0.0682699079999978 | 0.5326443909999981 | F | F | F |
| 0.9166666870000029 | 0.5682699079999978 | 0.5326443909999981 | F | F | F |
| 0.0814590033271192 | 0.1972372160842070 | 0.5988557285798571 | T | T | T |
| 0.0849529872349561 | 0.7077655408107980 | 0.5963513360852096 | T | T | T |
| 0.4141665055610330 | 0.1920218732562157 | 0.6005305672785404 | T | T | T |
| 0.4213643183021758 | 0.6837248577292584 | 0.6030003929879010 | T | T | T |
| 0.7488655655599059 | 0.1990593001725375 | 0.5976692136976401 | T | T | T |
| 0.7481053907988949 | 0.7233686290313232 | 0.5957010719686726 | T | T | T |
| 0.1852606330654728 | 0.1307272512685914 | 0.6390306357898848 | T | T | T |
| 0.9215705435303262 | 0.9542490962626299 | 0.6660530278780181 | T | T | T |
| 0.5264077306876684 | 0.1271688814099562 | 0.6374475582527424 | T | T | T |
| 0.5854661843786229 | 0.9521409152737262 | 0.6659823377035184 | T | T | T |
| 0.8532297696284864 | 0.1308050735953805 | 0.6383593374942518 | T | T | T |
| 0.0204322666317641 | 0.6311141753682488 | 0.6468752280698924 | T | T | T |
| 0.9045500527676497 | 0.4586064369348899 | 0.6636768034820645 | T | T | T |
| 0.2550628291402625 | 0.9532172380713846 | 0.6654055985376708 | T | T | T |
| 0.2844514951942325 | 0.6215369895824006 | 0.6307253630324592 | T | T | T |
| 0.2490005494922525 | 0.4459347669992258 | 0.6655070210732342 | T | T | T |
| 0.2007532045315822 | 0.3842891465096633 | 0.3336277575682219 | T | T | T |
| 0.4170555730916165 | 0.5926485893592960 | 0.3189306617214648 | T | T | T |
| 0.4179649899722188 | 0.5948614900346507 | 0.3626580805583461 | T | T | T |
| 0.7520366856437858 | 0.6032132108282345 | 0.3618166921193049 | T | T | T |
| 0.2509254317414580 | 0.3956792003097046 | 0.3753533075104794 | T | T | T |

|                    |                    |                    |   |   |   |
|--------------------|--------------------|--------------------|---|---|---|
| 0.5988832149546970 | 0.3885215413852942 | 0.3746662349969909 | T | T | T |
| 0.7482989840062161 | 0.0968084017846969 | 0.3616719349903258 | T | T | T |
| 0.0834857187238428 | 0.6003679928801735 | 0.3611855377390467 | T | T | T |
| 0.4142060835573992 | 0.0957736865075135 | 0.3615993810894415 | T | T | T |
| 0.2494636654742785 | 0.8818338625113011 | 0.3761223644550269 | T | T | T |
| 0.0814571691596011 | 0.0942723771523858 | 0.3613787094631202 | T | T | T |
| 0.5796428131262531 | 0.8835681355724915 | 0.3753082915498923 | T | T | T |
| 0.9048453018547219 | 0.3847666216198842 | 0.3773162356437174 | T | T | T |
| 0.9156280831356025 | 0.8826217845594310 | 0.3762175585493820 | T | T | T |
| 0.2497863882297343 | 0.2056020315513773 | 0.4260079287974221 | T | T | T |
| 0.2504668959237054 | 0.7107725511038074 | 0.4271057851687569 | T | T | T |
| 0.5818804721021160 | 0.2078244037405309 | 0.4269400510857297 | T | T | T |
| 0.5838068368923922 | 0.7093026510107385 | 0.4269289227714891 | T | T | T |
| 0.9169528816938610 | 0.2078721587330214 | 0.4264221515872922 | T | T | T |
| 0.9177588889358246 | 0.7092061631232096 | 0.4268824062244995 | T | T | T |
| 0.0820661345546612 | 0.0189610107505542 | 0.4419620482867359 | T | T | T |
| 0.0841327633667456 | 0.5199116208385175 | 0.4417845675335299 | T | T | T |
| 0.4147240321295169 | 0.0190001308370831 | 0.4420356124368363 | T | T | T |
| 0.4171281886591539 | 0.5194903619888623 | 0.4412252898892997 | T | T | T |
| 0.7487757559363507 | 0.0194885418251767 | 0.4420813680728935 | T | T | T |
| 0.7515075729960008 | 0.5203837644827005 | 0.4420271962529909 | T | T | T |
| 0.0833333129999971 | 0.3437488080000008 | 0.4914442899999969 | F | F | F |
| 0.0833333129999971 | 0.8437487779999984 | 0.4914442899999969 | F | F | F |
| 0.4166666870000029 | 0.3437488080000008 | 0.4914442899999969 | F | F | F |
| 0.4166666870000029 | 0.8437487779999984 | 0.4914442899999969 | F | F | F |
| 0.7500000000000000 | 0.3437488080000008 | 0.4914442899999969 | F | F | F |
| 0.7500000000000000 | 0.8437487779999984 | 0.4914442899999969 | F | F | F |
| 0.2500000000000000 | 0.1562512220000016 | 0.5085557100000031 | F | F | F |
| 0.2500000000000000 | 0.6562511919999992 | 0.5085557100000031 | F | F | F |
| 0.5833333129999971 | 0.1562512220000016 | 0.5085557100000031 | F | F | F |
| 0.5833333129999971 | 0.6562511919999992 | 0.5085557100000031 | F | F | F |
| 0.9166666870000029 | 0.1562512220000016 | 0.5085557100000031 | F | F | F |
| 0.9166666870000029 | 0.6562511919999992 | 0.5085557100000031 | F | F | F |
| 0.2484924270039993 | 0.4796162355172993 | 0.5579728037470091 | T | T | T |
| 0.2512242440636493 | 0.9805114581748233 | 0.5579186319271063 | T | T | T |
| 0.5828718113408462 | 0.4805096380111378 | 0.5587747101107002 | T | T | T |
| 0.5852759678704832 | 0.9809998691629168 | 0.5579643875631638 | T | T | T |
| 0.9158672366332543 | 0.4800883791614823 | 0.5582154324664702 | T | T | T |
| 0.9179338654453391 | 0.9810389892494457 | 0.5580379517132640 | T | T | T |
| 0.0822411110641753 | 0.2907938368767903 | 0.5731175937755076 | T | T | T |
| 0.0830471183061388 | 0.7921278412669785 | 0.5735778484127079 | T | T | T |
| 0.4161931631076078 | 0.2906973489892615 | 0.5730710772285038 | T | T | T |
| 0.4181195278978838 | 0.7921755962594690 | 0.5730599489142704 | T | T | T |
| 0.7495331040762945 | 0.2892274488961927 | 0.5728942148312429 | T | T | T |
| 0.7502136117702659 | 0.7943979684486226 | 0.5739920712025780 | T | T | T |
| 0.0843719168643973 | 0.1173782154405691 | 0.6237824414506180 | T | T | T |
| 0.0951546981452781 | 0.6152333783801157 | 0.6226837643562828 | T | T | T |
| 0.4203571868737468 | 0.1164318644275084 | 0.6246917084501078 | T | T | T |
| 0.9185428308403989 | 0.9057276228476142 | 0.6386212905368799 | T | T | T |
| 0.7505363345257212 | 0.1181661374886988 | 0.6238776355449731 | T | T | T |
| 0.5857939164426007 | 0.9042263134924864 | 0.6384006189105583 | T | T | T |
| 0.9165142812761571 | 0.3996320071198263 | 0.6388144622609532 | T | T | T |
| 0.2517010159937839 | 0.9031915982153029 | 0.6383280650096742 | T | T | T |
| 0.4011167850453033 | 0.6114784586147060 | 0.6253337650030090 | T | T | T |
| 0.7490745682585420 | 0.6043207996902952 | 0.6246466924895204 | T | T | T |
| 0.2479633143562142 | 0.3967867891717654 | 0.6381833078806950 | T | T | T |
| 0.5820350100277810 | 0.4051385099653494 | 0.6373419194416539 | T | T | T |
| 0.5829444269083836 | 0.4073514106407042 | 0.6810693382785351 | T | T | T |
| 0.7992467954684179 | 0.6157108534903366 | 0.6663722424317781 | T | T | T |

6'

1.00000000000000

8.5086002349999994 0.0000000000000000 0.0000000000000000

0.0000000000000000 10.8548107146999993 0.0000000000000000  
0.0000000000000000 0.0000000000000000 30.0000000000000000

Co H O  
24 44 64

Selective dynamics

Direct

|                    |                    |                    |   |   |   |
|--------------------|--------------------|--------------------|---|---|---|
| 0.2475172406231820 | 0.0445033151769394 | 0.3998168562604434 | T | T | T |
| 0.2537488545084443 | 0.5544516363360117 | 0.3995701393436661 | T | T | T |
| 0.5811853335182704 | 0.0443781284722036 | 0.3998457648513423 | T | T | T |
| 0.5822342453710192 | 0.5521206880228249 | 0.3996367658263935 | T | T | T |
| 0.9141598801815149 | 0.0481978107321126 | 0.4006863416891804 | T | T | T |
| 0.9185983358692127 | 0.5500330778975808 | 0.4003915518930157 | T | T | T |
| 0.0833333129999971 | 0.1817300920000022 | 0.4673556090000019 | F | F | F |
| 0.0833333129999971 | 0.6817300319999973 | 0.4673556090000019 | F | F | F |
| 0.4166666870000029 | 0.1817300920000022 | 0.4673556090000019 | F | F | F |
| 0.4166666870000029 | 0.6817300319999973 | 0.4673556090000019 | F | F | F |
| 0.7500000000000000 | 0.1817300920000022 | 0.4673556090000019 | F | F | F |
| 0.7500000000000000 | 0.6817300319999973 | 0.4673556090000019 | F | F | F |
| 0.2500000000000000 | 0.3182699680000027 | 0.5326443909999981 | F | F | F |
| 0.2500000000000000 | 0.8182699079999978 | 0.5326443909999981 | F | F | F |
| 0.5833333129999971 | 0.3182699680000027 | 0.5326443909999981 | F | F | F |
| 0.5833333129999971 | 0.8182699079999978 | 0.5326443909999981 | F | F | F |
| 0.9166666870000029 | 0.3182699680000027 | 0.5326443909999981 | F | F | F |
| 0.9166666870000029 | 0.8182699079999978 | 0.5326443909999981 | F | F | F |
| 0.0814016641307802 | 0.4499669221024263 | 0.5996084481069843 | T | T | T |
| 0.0858401198184851 | 0.9518021892678874 | 0.5993136583108196 | T | T | T |
| 0.4177657546289808 | 0.4478793119771751 | 0.6003632341736065 | T | T | T |
| 0.4188146664817296 | 0.9556218715277964 | 0.6001542351486577 | T | T | T |
| 0.7462511454915557 | 0.4455483636639883 | 0.6004298606563339 | T | T | T |
| 0.7524827593768180 | 0.9554966848230606 | 0.6001831437395566 | T | T | T |
| 0.4163232842229618 | 0.5497361968834582 | 0.3361078068844776 | T | T | T |
| 0.7525803413886152 | 0.5310183304407445 | 0.3367759680744697 | T | T | T |
| 0.7474501651236807 | 0.0442252940481751 | 0.3344159650541769 | T | T | T |
| 0.0855561950734298 | 0.5563668512397371 | 0.3334852012819383 | T | T | T |
| 0.0376676285073714 | 0.3739264674018941 | 0.3657142571560357 | T | T | T |
| 0.1443780022181116 | 0.8681785795641090 | 0.3620467454419938 | T | T | T |
| 0.4124343802967303 | 0.0413883223124287 | 0.3340473104867101 | T | T | T |
| 0.4818613747348550 | 0.8673373458252627 | 0.3619877484368814 | T | T | T |
| 0.0771969071094105 | 0.0447417943355717 | 0.3343257812394000 | T | T | T |
| 0.8028797710693709 | 0.8709925782347696 | 0.3640473660160666 | T | T | T |
| 0.2575925952664804 | 0.2768757966721651 | 0.4039264163751000 | T | T | T |
| 0.2512689771954797 | 0.7997024524583338 | 0.4025870248860386 | T | T | T |
| 0.5778107682913785 | 0.2772892283866994 | 0.4043191890098612 | T | T | T |
| 0.5866205469218926 | 0.7953748225688386 | 0.4037953980163280 | T | T | T |
| 0.9140643700978046 | 0.3103486638974857 | 0.3983644040478254 | T | T | T |
| 0.9180111142138259 | 0.8051799124635863 | 0.4000517904327836 | T | T | T |
| 0.0833333129999971 | 0.4317300920000022 | 0.4673556090000019 | F | F | F |
| 0.0833333129999971 | 0.9317300920000022 | 0.4673556090000019 | F | F | F |
| 0.4166666870000029 | 0.4317300920000022 | 0.4673556090000019 | F | F | F |
| 0.4166666870000029 | 0.9317300920000022 | 0.4673556090000019 | F | F | F |
| 0.7500000000000000 | 0.4317300920000022 | 0.4673556090000019 | F | F | F |
| 0.7500000000000000 | 0.9317300920000022 | 0.4673556090000019 | F | F | F |
| 0.2500000000000000 | 0.0682699079999978 | 0.5326443909999981 | F | F | F |
| 0.2500000000000000 | 0.5682699079999978 | 0.5326443909999981 | F | F | F |
| 0.5833333129999971 | 0.0682699079999978 | 0.5326443909999981 | F | F | F |
| 0.5833333129999971 | 0.5682699079999978 | 0.5326443909999981 | F | F | F |
| 0.9166666870000029 | 0.0682699079999978 | 0.5326443909999981 | F | F | F |
| 0.9166666870000029 | 0.5682699079999978 | 0.5326443909999981 | F | F | F |
| 0.0819888857861741 | 0.1948200875364137 | 0.5999482095672164 | T | T | T |
| 0.0859356299021954 | 0.6896513361025143 | 0.6016355959521746 | T | T | T |
| 0.4133794530781074 | 0.2046251774311614 | 0.5962046019836720 | T | T | T |
| 0.4221892317086215 | 0.7227107716133006 | 0.5956808109901388 | T | T | T |
| 0.7487310228045203 | 0.2002975475416662 | 0.5974129751139614 | T | T | T |

|                    |                    |                    |   |   |   |
|--------------------|--------------------|--------------------|---|---|---|
| 0.7424074047335196 | 0.7231242033278349 | 0.5960735836249000 | T | T | T |
| 0.1971202289306291 | 0.1290074217652304 | 0.6359526339839334 | T | T | T |
| 0.9228030928905895 | 0.9552582056644212 | 0.6656742187606000 | T | T | T |
| 0.5181386252651450 | 0.1326626541747373 | 0.6380122515631186 | T | T | T |
| 0.5875656197032697 | 0.9586116776875713 | 0.6659526895132899 | T | T | T |
| 0.8556219977818884 | 0.1318214204358910 | 0.6379532545580062 | T | T | T |
| 0.9623323714926286 | 0.6260735325981059 | 0.6342857428439643 | T | T | T |
| 0.9144438049265702 | 0.4436331487602629 | 0.6665147987180617 | T | T | T |
| 0.2525498348763193 | 0.9557747059518249 | 0.6655840349458231 | T | T | T |
| 0.2474196586113848 | 0.4689816695592484 | 0.6632240319255303 | T | T | T |
| 0.5836767157770382 | 0.4502638031165418 | 0.6638921931155224 | T | T | T |
| 0.5324119858373990 | 0.3813700500281740 | 0.3337721630023225 | T | T | T |
| 0.3063027834422769 | 0.3864203484794828 | 0.3316363172956898 | T | T | T |
| 0.4184479639880649 | 0.607630565555103  | 0.3614271293299183 | T | T | T |
| 0.7512828916934922 | 0.5929213619560585 | 0.3605115245700929 | T | T | T |
| 0.2656778702580311 | 0.3940334869786497 | 0.3748214124813884 | T | T | T |
| 0.5637533326622943 | 0.3920344360564414 | 0.3768223662112575 | T | T | T |
| 0.7474335041110294 | 0.0942388221652593 | 0.3615143392448346 | T | T | T |
| 0.0849135641967536 | 0.6021310564813760 | 0.3615509228450620 | T | T | T |
| 0.4144260038937375 | 0.0909612085718621 | 0.3612342428528734 | T | T | T |
| 0.2472004742288050 | 0.8816738370027721 | 0.3762357121997795 | T | T | T |
| 0.0812254614069801 | 0.0942961414731442 | 0.3615039581699335 | T | T | T |
| 0.5841974959309297 | 0.8817819285179525 | 0.3763481238963990 | T | T | T |
| 0.9282558685509485 | 0.3849318585349266 | 0.3753229422821036 | T | T | T |
| 0.9105636662560173 | 0.8824160204722276 | 0.3758585811582051 | T | T | T |
| 0.2508589244949917 | 0.2056206633761377 | 0.4258665113851094 | T | T | T |
| 0.2504254262242043 | 0.7112963529463485 | 0.4273880156476650 | T | T | T |
| 0.5824787519081980 | 0.2049634822181403 | 0.4261036118044785 | T | T | T |
| 0.5851614466566062 | 0.7103340336338704 | 0.4271373330454793 | T | T | T |
| 0.9156735690833173 | 0.2073148809619099 | 0.4268198191955221 | T | T | T |
| 0.9166250857211580 | 0.7081186366860024 | 0.4268599722581428 | T | T | T |
| 0.0820421848443615 | 0.0189927029976076 | 0.4421042129072745 | T | T | T |
| 0.0861194010972852 | 0.5198082704108344 | 0.4416611978591476 | T | T | T |
| 0.4148169606987366 | 0.0183413633482061 | 0.4419710595161064 | T | T | T |
| 0.4171960934828647 | 0.5213143403811600 | 0.4419453964737272 | T | T | T |
| 0.7480684894288672 | 0.0189091336190543 | 0.4421647984506762 | T | T | T |
| 0.7499440044343757 | 0.5187336801139537 | 0.4415901026417615 | T | T | T |
| 0.0833333129999971 | 0.3437488080000008 | 0.4914442899999969 | F | F | F |
| 0.0833333129999971 | 0.8437487779999984 | 0.4914442899999969 | F | F | F |
| 0.4166666870000029 | 0.3437488080000008 | 0.4914442899999969 | F | F | F |
| 0.4166666870000029 | 0.8437487779999984 | 0.4914442899999969 | F | F | F |
| 0.7500000000000000 | 0.3437488080000008 | 0.4914442899999969 | F | F | F |
| 0.7500000000000000 | 0.8437487779999984 | 0.4914442899999969 | F | F | F |
| 0.2500000000000000 | 0.1562512220000016 | 0.5085557100000031 | F | F | F |
| 0.2500000000000000 | 0.6562511919999992 | 0.5085557100000031 | F | F | F |
| 0.5833333129999971 | 0.1562512220000016 | 0.5085557100000031 | F | F | F |
| 0.5833333129999971 | 0.6562511919999992 | 0.5085557100000031 | F | F | F |
| 0.9166666870000029 | 0.1562512220000016 | 0.5085557100000031 | F | F | F |
| 0.9166666870000029 | 0.6562511919999992 | 0.5085557100000031 | F | F | F |
| 0.2500559955656243 | 0.4812663198860463 | 0.5584098973582385 | T | T | T |
| 0.2519315105711328 | 0.9810908663809457 | 0.5578352015493238 | T | T | T |
| 0.5828039065171353 | 0.4786856596188400 | 0.5580546035262728 | T | T | T |
| 0.5851830393012634 | 0.9816586366517939 | 0.5580289404838936 | T | T | T |
| 0.9138805989027148 | 0.4801917295891656 | 0.5583388021408524 | T | T | T |
| 0.9179578151556385 | 0.9810072970023924 | 0.5578957870927255 | T | T | T |
| 0.0833749142788420 | 0.2918813633139976 | 0.5731400277418572 | T | T | T |
| 0.0843264309166827 | 0.7926851190380901 | 0.5731801808044779 | T | T | T |
| 0.4148385533433938 | 0.2896659663661296 | 0.5728626669545207 | T | T | T |
| 0.4175212480918020 | 0.7950365177818597 | 0.5738963881955215 | T | T | T |
| 0.7495745737757957 | 0.2887036470536515 | 0.5726119843523350 | T | T | T |
| 0.7491410755050083 | 0.7943793366238623 | 0.5741334886148906 | T | T | T |
| 0.0894363337439827 | 0.1175839795277724 | 0.6241414188417949 | T | T | T |
| 0.0717441314490515 | 0.6150681414650734 | 0.6246770577178964 | T | T | T |

|                    |                    |                    |   |   |   |
|--------------------|--------------------|--------------------|---|---|---|
| 0.4158025040690703 | 0.1182180714820475 | 0.6236518761036010 | T | T | T |
| 0.9187745385930199 | 0.9057038585268558 | 0.6384960418300665 | T | T | T |
| 0.7527995257712021 | 0.1183261629972279 | 0.6237642878002205 | T | T | T |
| 0.5855739961062625 | 0.9090387914281379 | 0.6387657571471266 | T | T | T |
| 0.9150864358032464 | 0.3978689435186240 | 0.6384490771549380 | T | T | T |
| 0.2525664958889706 | 0.9057611778347407 | 0.6384856607551654 | T | T | T |
| 0.4362466673376986 | 0.6079655639435586 | 0.6231776337887425 | T | T | T |
| 0.7343221297419689 | 0.6059665130213503 | 0.6251785875186116 | T | T | T |
| 0.2487171083065078 | 0.4070786380439415 | 0.6394884754299071 | T | T | T |
| 0.5815520360119351 | 0.3923694344444897 | 0.6385728706700817 | T | T | T |
| 0.6936972165577231 | 0.6135796515205172 | 0.6683636827043102 | T | T | T |
| 0.4675880141626010 | 0.6186299499718260 | 0.6662278369976775 | T | T | T |

6"

|                    |                     |                     |  |  |  |
|--------------------|---------------------|---------------------|--|--|--|
| 1.0000000000000000 |                     |                     |  |  |  |
| 8.5086002349999994 | 0.0000000000000000  | 0.0000000000000000  |  |  |  |
| 0.0000000000000000 | 10.8548107146999993 | 0.0000000000000000  |  |  |  |
| 0.0000000000000000 | 0.0000000000000000  | 30.0000000000000000 |  |  |  |

Co H O

24 44 64

Selective dynamics

Direct

|                    |                    |                    |   |   |   |
|--------------------|--------------------|--------------------|---|---|---|
| 0.5839243234995891 | 0.5489491224044218 | 0.3999341124988530 | T | T | T |
| 0.2490043883205640 | 0.5506019960757416 | 0.4010997168590995 | T | T | T |
| 0.5844076992690809 | 0.0494461697008045 | 0.4002547374704195 | T | T | T |
| 0.2510275130581028 | 0.0504056212093159 | 0.4005371164540381 | T | T | T |
| 0.9177475916863795 | 0.0500525605956482 | 0.4005906313198090 | T | T | T |
| 0.9208422874808061 | 0.5489874850708362 | 0.4009419493100276 | T | T | T |
| 0.0833333129999971 | 0.1817300920000022 | 0.4673556090000019 | F | F | F |
| 0.0833333129999971 | 0.6817300319999973 | 0.4673556090000019 | F | F | F |
| 0.4166666870000029 | 0.1817300920000022 | 0.4673556090000019 | F | F | F |
| 0.4166666870000029 | 0.6817300319999973 | 0.4673556090000019 | F | F | F |
| 0.7500000000000000 | 0.1817300920000022 | 0.4673556090000019 | F | F | F |
| 0.7500000000000000 | 0.6817300319999973 | 0.4673556090000019 | F | F | F |
| 0.2500000000000000 | 0.3182699680000027 | 0.5326443909999981 | F | F | F |
| 0.2500000000000000 | 0.8182699079999978 | 0.5326443909999981 | F | F | F |
| 0.5833333129999971 | 0.3182699680000027 | 0.5326443909999981 | F | F | F |
| 0.5833333129999971 | 0.8182699079999978 | 0.5326443909999981 | F | F | F |
| 0.9166666870000029 | 0.3182699680000027 | 0.5326443909999981 | F | F | F |
| 0.9166666870000029 | 0.8182699079999978 | 0.5326443909999981 | F | F | F |
| 0.0791577125191939 | 0.4510125149291643 | 0.5990580506899728 | T | T | T |
| 0.0822524083136202 | 0.9499474394043517 | 0.5994093686801907 | T | T | T |
| 0.7489724869418969 | 0.9495943787906842 | 0.5994628835459620 | T | T | T |
| 0.4155923007309191 | 0.9505538302991946 | 0.5997452625295809 | T | T | T |
| 0.7509956116794367 | 0.4493980039242584 | 0.5989002831409004 | T | T | T |
| 0.4160756765004104 | 0.4510508775955779 | 0.6000658875011468 | T | T | T |
| 0.3619367469742013 | 0.3752685512456292 | 0.3648655926623934 | T | T | T |
| 0.6566446345917843 | 0.3713745180840705 | 0.3549576130985725 | T | T | T |
| 0.7536960265254705 | 0.0486658832111294 | 0.3343341873587754 | T | T | T |
| 0.0868219677688995 | 0.5491489993094351 | 0.3350791121091519 | T | T | T |
| 0.0352847190808190 | 0.3725007786651454 | 0.3646542399803282 | T | T | T |
| 0.0206378195009428 | 0.8712575096752727 | 0.3610185992821208 | T | T | T |
| 0.4190192763821393 | 0.0495248046837419 | 0.3342689515840703 | T | T | T |
| 0.3532287835193652 | 0.8728130935771352 | 0.3609666187826711 | T | T | T |
| 0.0864259326980026 | 0.0496474859323767 | 0.3345854460889219 | T | T | T |
| 0.6863444768901505 | 0.8727665760709680 | 0.3608839040014660 | T | T | T |
| 0.2479884821750637 | 0.3055950497148132 | 0.4008609828324409 | T | T | T |
| 0.2475944861613718 | 0.8078507649536655 | 0.3997473664937582 | T | T | T |
| 0.5812162422207611 | 0.2935059042742527 | 0.4031242459329787 | T | T | T |
| 0.5824159833531670 | 0.8063033773792505 | 0.4003126345708842 | T | T | T |
| 0.9164351246913610 | 0.3073599695170228 | 0.3996813910384643 | T | T | T |
| 0.9156339174567316 | 0.8071461383043426 | 0.3997116867395168 | T | T | T |
| 0.0833333129999971 | 0.4317300920000022 | 0.4673556090000019 | F | F | F |



0.0833333129999971 0.9317300920000022 0.4673556090000019 F F F  
 0.4166666870000029 0.4317300920000022 0.4673556090000019 F F F  
 0.4166666870000029 0.9317300920000022 0.4673556090000019 F F F  
 0.7500000000000000 0.4317300920000022 0.4673556090000019 F F F  
 0.7500000000000000 0.9317300920000022 0.4673556090000019 F F F  
 0.2500000000000000 0.0682699079999978 0.5326443909999981 F F F  
 0.2500000000000000 0.5682699079999978 0.5326443909999981 F F F  
 0.5833333129999971 0.0682699079999978 0.5326443909999981 F F F  
 0.5833333129999971 0.5682699079999978 0.5326443909999981 F F F  
 0.9166666870000029 0.0682699079999978 0.5326443909999981 F F F  
 0.9166666870000029 0.5682699079999978 0.5326443909999981 F F F  
 0.0843660825432686 0.1928538616956574 0.6002883132604833 T T T  
 0.0835648753086385 0.6926400304829764 0.6003186089615360 T T T  
 0.4175840166468335 0.1936966226207502 0.5996873654291159 T T T  
 0.4187837577792392 0.7064940957257480 0.5968757540670219 T T T  
 0.7524055138386282 0.1921492350463349 0.6002526335062409 T T T  
 0.7520115178249364 0.6944049502851871 0.5991390171675595 T T T  
 0.3136555231098497 0.1272334239290320 0.6391160959985343 T T T  
 0.9135740673019980 0.9503525140676227 0.6654145539110784 T T T  
 0.6467712164806344 0.1271869064228645 0.6390333812173296 T T T  
 0.5809807236178609 0.9504751953162580 0.6657310484159302 T T T  
 0.9793621804990568 0.1287424903247273 0.6389814007178789 T T T  
 0.9647152809191806 0.6274992213348547 0.6353457600196720 T T T  
 0.9131780322311009 0.4508510006905650 0.6649208878908489 T T T  
 0.2463039734745295 0.9513341167888713 0.6656658126412253 T T T  
 0.3433553654082162 0.6286254819159289 0.6450423869014282 T T T  
 0.6380632530257990 0.6247314487543713 0.6351344073376065 T T T  
 0.4053066334160505 0.5766602927074922 0.3192762441124140 T T T  
 0.7611154261533809 0.5686314139248343 0.3191653960459347 T T T  
 0.4139080477350949 0.5931803053379255 0.3626417219014663 T T T  
 0.7542013752590240 0.5879065078161725 0.3623985279499308 T T T  
 0.2532239240541685 0.3847047143918685 0.3765582746982519 T T T  
 0.5728720314210826 0.3842096692331379 0.3767388905914424 T T T  
 0.7508966325946201 0.0982434576039567 0.3615097127029280 T T T  
 0.0846222258193243 0.5997037222146095 0.3620694702482269 T T T  
 0.4177243284386361 0.0987558506392703 0.3615342180572363 T T T  
 0.2508556044559158 0.8841861051258588 0.3755892804759495 T T T  
 0.0842603149698891 0.0993026918053000 0.3617420133195902 T T T  
 0.5843657156641098 0.8836819052174530 0.3757867589543490 T T T  
 0.9277206169251154 0.3842396888165545 0.3761439964043501 T T T  
 0.9181989772384735 0.8833246668274505 0.3755663021569554 T T T  
 0.2496405720054991 0.2088857557634897 0.4267836729955041 T T T  
 0.2494755544485113 0.7091034933745732 0.4268200058712146 T T T  
 0.5832716605640460 0.2086311038742024 0.4264116746290804 T T T  
 0.5834941901196283 0.7082206306440110 0.4262661440980725 T T T  
 0.9158444665073370 0.2082073665354024 0.4268508092765415 T T T  
 0.9161867707322591 0.7079922192261506 0.4266974744731326 T T T  
 0.0842103660043458 0.0196168399926070 0.4420189552729341 T T T  
 0.0844411409176224 0.5196532176642974 0.4423795789666600 T T T  
 0.4176650864985074 0.0196527150258820 0.4419566579273948 T T T  
 0.4172835757569681 0.5200497468145022 0.4418024767183761 T T T  
 0.7504574485401408 0.0194897666386989 0.4419713629375017 T T T  
 0.7508363237144350 0.5190644101561959 0.4416257218054621 T T T  
 0.0833333129999971 0.3437488080000008 0.4914442899999969 F F F  
 0.0833333129999971 0.8437487779999984 0.4914442899999969 F F F  
 0.4166666870000029 0.3437488080000008 0.4914442899999969 F F F  
 0.4166666870000029 0.8437487779999984 0.4914442899999969 F F F  
 0.7500000000000000 0.3437488080000008 0.4914442899999969 F F F  
 0.7500000000000000 0.8437487779999984 0.4914442899999969 F F F  
 0.2500000000000000 0.1562512220000016 0.5085557100000031 F F F  
 0.2500000000000000 0.6562511919999992 0.5085557100000031 F F F  
 0.5833333129999971 0.1562512220000016 0.5085557100000031 F F F  
 0.5833333129999971 0.6562511919999992 0.5085557100000031 F F F

|                    |                    |                    |   |   |   |
|--------------------|--------------------|--------------------|---|---|---|
| 0.9166666870000029 | 0.1562512220000016 | 0.5085557100000031 | F | F | F |
| 0.9166666870000029 | 0.6562511919999992 | 0.5085557100000031 | F | F | F |
| 0.2491636762855651 | 0.4809355898438034 | 0.5583742781945392 | T | T | T |
| 0.2495425514598588 | 0.9805102333613006 | 0.5580286370624984 | T | T | T |
| 0.5827164242430320 | 0.4799502531854977 | 0.5581975232816239 | T | T | T |
| 0.5823349135014915 | 0.9803472849741179 | 0.5580433420726059 | T | T | T |
| 0.9155588590823774 | 0.4803467823357018 | 0.5576204210333400 | T | T | T |
| 0.9157896339956541 | 0.9803831600073925 | 0.5579810447270664 | T | T | T |
| 0.0838132292677404 | 0.2920077807738491 | 0.5733025255268679 | T | T | T |
| 0.0841555334926629 | 0.7917926334645977 | 0.5731491907234582 | T | T | T |
| 0.4165058098803717 | 0.2917793693559877 | 0.5737338559019280 | T | T | T |
| 0.4167283394359543 | 0.7913688961257977 | 0.5735883253709195 | T | T | T |
| 0.7505244455514889 | 0.2908965066254267 | 0.5731799941287850 | T | T | T |
| 0.7503594279945016 | 0.7911142442365101 | 0.5732163270044957 | T | T | T |
| 0.0818010227615268 | 0.1166753331725506 | 0.6244336978430448 | T | T | T |
| 0.0722793830748844 | 0.6157603111834462 | 0.6238560035956494 | T | T | T |
| 0.4156342843358904 | 0.1163180947825463 | 0.6242132410456511 | T | T | T |
| 0.9157396850301108 | 0.9006973081947001 | 0.6382579866804100 | T | T | T |
| 0.7491443955440843 | 0.1158138948741410 | 0.6244107195240500 | T | T | T |
| 0.5822756715613643 | 0.9012441493607303 | 0.6384657819427634 | T | T | T |
| 0.9153777741806761 | 0.4002962777853903 | 0.6379305297517731 | T | T | T |
| 0.2491033674053794 | 0.9017565423960435 | 0.6384902872970724 | T | T | T |
| 0.4271279685789181 | 0.6157903307668631 | 0.6232611094085575 | T | T | T |
| 0.7467760759458318 | 0.6152952856081310 | 0.6234417253017486 | T | T | T |
| 0.2457986247409758 | 0.4120934921838278 | 0.6376014720500693 | T | T | T |
| 0.5860919522649047 | 0.4068196946620743 | 0.6373582780985342 | T | T | T |
| 0.2388845738466192 | 0.4313685860751653 | 0.6808346039540653 | T | T | T |
| 0.5946933665839492 | 0.4233397072925076 | 0.6807237558875866 | T | T | T |

6\*\*

|                    |                     |                     |
|--------------------|---------------------|---------------------|
| 1.0000000000000000 |                     |                     |
| 8.5086002349999994 | 0.0000000000000000  | 0.0000000000000000  |
| 0.0000000000000000 | 10.8548107146999993 | 0.0000000000000000  |
| 0.0000000000000000 | 0.0000000000000000  | 30.0000000000000000 |

Co H O

24 44 64

Selective dynamics

Direct

|                    |                    |                    |   |   |   |
|--------------------|--------------------|--------------------|---|---|---|
| 0.5815355187124261 | 0.5489937303758109 | 0.4004099949226755 | T | T | T |
| 0.2449353495984261 | 0.5498379793247892 | 0.4006437046062323 | T | T | T |
| 0.5850074390020154 | 0.0506867306270406 | 0.4005972710165065 | T | T | T |
| 0.2516242947021946 | 0.0503277022248873 | 0.4005796907679186 | T | T | T |
| 0.9182070854703926 | 0.0491439390994299 | 0.4002668255724705 | T | T | T |
| 0.9171892468271018 | 0.5497733934437374 | 0.4006366651448522 | T | T | T |
| 0.0833333129999971 | 0.1817300920000022 | 0.4673556090000019 | F | F | F |
| 0.0833333129999971 | 0.6817300319999973 | 0.4673556090000019 | F | F | F |
| 0.4166666870000029 | 0.1817300920000022 | 0.4673556090000019 | F | F | F |
| 0.4166666870000029 | 0.6817300319999973 | 0.4673556090000019 | F | F | F |
| 0.7500000000000000 | 0.1817300920000022 | 0.4673556090000019 | F | F | F |
| 0.7500000000000000 | 0.6817300319999973 | 0.4673556090000019 | F | F | F |
| 0.2500000000000000 | 0.3182699680000027 | 0.5326443909999981 | F | F | F |
| 0.2500000000000000 | 0.8182699079999978 | 0.5326443909999981 | F | F | F |
| 0.5833333129999971 | 0.3182699680000027 | 0.5326443909999981 | F | F | F |
| 0.5833333129999971 | 0.8182699079999978 | 0.5326443909999981 | F | F | F |
| 0.9166666870000029 | 0.3182699680000027 | 0.5326443909999981 | F | F | F |
| 0.9166666870000029 | 0.8182699079999978 | 0.5326443909999981 | F | F | F |
| 0.0828107531728981 | 0.4502266065562626 | 0.5993633348551478 | T | T | T |
| 0.0817929145296074 | 0.9508560609005703 | 0.5997331744275297 | T | T | T |
| 0.4184644812875740 | 0.4510062696241890 | 0.5995900050773243 | T | T | T |
| 0.4149925609979846 | 0.9493132693729592 | 0.5994027289834936 | T | T | T |
| 0.7550646504015739 | 0.4501620206752109 | 0.5993562953937678 | T | T | T |
| 0.7483757052978054 | 0.9496722977751199 | 0.5994203092320813 | T | T | T |
| 0.4784566657220272 | 0.3720008058854288 | 0.3606391951954268 | T | T | T |

|                    |                    |                    |   |   |   |
|--------------------|--------------------|--------------------|---|---|---|
| 0.8332643309254519 | 0.3723036886511299 | 0.3575721946032119 | T | T | T |
| 0.7530218701924811 | 0.0501835450573487 | 0.3341890426372467 | T | T | T |
| 0.0789615020569210 | 0.5492379238750779 | 0.3349389407513325 | T | T | T |
| 0.1263141749597777 | 0.3738283551454807 | 0.3668489159773290 | T | T | T |
| 0.0204841839507061 | 0.8712252776187854 | 0.3617186625798416 | T | T | T |
| 0.4208869367761128 | 0.0493631734772098 | 0.3346031979785901 | T | T | T |
| 0.3471876818384031 | 0.8701038101522756 | 0.3595009317095830 | T | T | T |
| 0.0876031206214394 | 0.0483286593147905 | 0.3344617605479876 | T | T | T |
| 0.6924139639442657 | 0.8742165916694604 | 0.3622097252698023 | T | T | T |
| 0.2504936856510693 | 0.3076527042606880 | 0.3998795007132077 | T | T | T |
| 0.2464529910816462 | 0.8073662112159693 | 0.3997256285429294 | T | T | T |
| 0.5838020622785841 | 0.3050901939646584 | 0.4000035447632924 | T | T | T |
| 0.5813359664092643 | 0.8097366564484837 | 0.3990825315802201 | T | T | T |
| 0.9185147349306726 | 0.2921625445327917 | 0.4038317451863854 | T | T | T |
| 0.9149433316532385 | 0.8048053261324627 | 0.4008319344972915 | T | T | T |
| 0.0833333129999971 | 0.4317300920000022 | 0.4673556090000019 | F | F | F |
| 0.0833333129999971 | 0.9317300920000022 | 0.4673556090000019 | F | F | F |
| 0.4166666870000029 | 0.4317300920000022 | 0.4673556090000019 | F | F | F |
| 0.4166666870000029 | 0.9317300920000022 | 0.4673556090000019 | F | F | F |
| 0.7500000000000000 | 0.4317300920000022 | 0.4673556090000019 | F | F | F |
| 0.7500000000000000 | 0.9317300920000022 | 0.4673556090000019 | F | F | F |
| 0.2500000000000000 | 0.0682699079999978 | 0.5326443909999981 | F | F | F |
| 0.2500000000000000 | 0.5682699079999978 | 0.5326443909999981 | F | F | F |
| 0.5833333129999971 | 0.0682699079999978 | 0.5326443909999981 | F | F | F |
| 0.5833333129999971 | 0.5682699079999978 | 0.5326443909999981 | F | F | F |
| 0.9166666870000029 | 0.0682699079999978 | 0.5326443909999981 | F | F | F |
| 0.9166666870000029 | 0.5682699079999978 | 0.5326443909999981 | F | F | F |
| 0.0850566683467615 | 0.1951946738675373 | 0.5991680655027084 | T | T | T |
| 0.0814852650693274 | 0.7078374554672082 | 0.5961682548136146 | T | T | T |
| 0.4186640335907357 | 0.1902633435515163 | 0.6009174684197870 | T | T | T |
| 0.4161979377214160 | 0.6949098060353416 | 0.5999964552367076 | T | T | T |
| 0.7535470089183538 | 0.1926337887840307 | 0.6002743714570705 | T | T | T |
| 0.7495063143489308 | 0.6923472957393119 | 0.6001204992867923 | T | T | T |
| 0.3075860360557341 | 0.1257834083305396 | 0.6377902747301977 | T | T | T |
| 0.9123968793785606 | 0.9516713406852094 | 0.6655382394520124 | T | T | T |
| 0.6528123181615969 | 0.1298961898477245 | 0.6404990682904169 | T | T | T |
| 0.5791130632238872 | 0.9506368265227902 | 0.6653968020214099 | T | T | T |
| 0.9795158160492939 | 0.1287747223812146 | 0.6382813374201584 | T | T | T |
| 0.8736858250402151 | 0.6261716448545193 | 0.6331510840226710 | T | T | T |
| 0.9210384979430789 | 0.4507620761249223 | 0.6650610592486675 | T | T | T |
| 0.2469781298075260 | 0.9498164549426514 | 0.6658109573627533 | T | T | T |
| 0.1667356690745481 | 0.6276963113488702 | 0.6424278053967881 | T | T | T |
| 0.5215433342779727 | 0.6279991941145712 | 0.6393608048045732 | T | T | T |
| 0.7526293309986123 | 0.5644761893510396 | 0.3193965469655773 | T | T | T |
| 0.4159305371747138 | 0.6717405217589058 | 0.3310643628477875 | T | T | T |
| 0.4134930129728247 | 0.5872940770894037 | 0.3623624277270940 | T | T | T |
| 0.7503884305639498 | 0.5885974023992102 | 0.3624021855977047 | T | T | T |
| 0.2385653515498223 | 0.3841878539701036 | 0.3760350939752410 | T | T | T |
| 0.5795824228003262 | 0.3833597269770828 | 0.3759108051556482 | T | T | T |
| 0.7519280216266793 | 0.0988842384735223 | 0.3615831403317609 | T | T | T |
| 0.0809097764732647 | 0.6003242612527693 | 0.3618091016314833 | T | T | T |
| 0.4183781884459368 | 0.0991757272707132 | 0.3617236180069422 | T | T | T |
| 0.2484670567846081 | 0.8842569275639031 | 0.3757143762351042 | T | T | T |
| 0.0846858656232009 | 0.0982627504524478 | 0.3615546515946528 | T | T | T |
| 0.5871155122855417 | 0.8850921298689827 | 0.3754157931183906 | T | T | T |
| 0.9243494092032476 | 0.3850050349482926 | 0.3770030022081396 | T | T | T |
| 0.9173035231978105 | 0.8831902607665076 | 0.3760437237465336 | T | T | T |
| 0.2507512754136392 | 0.2084264821154116 | 0.4268575167805724 | T | T | T |
| 0.2494456496654250 | 0.7084144461822640 | 0.4265493738326864 | T | T | T |
| 0.5839982794845586 | 0.2087553873419409 | 0.4268217186365343 | T | T | T |
| 0.5827559473785394 | 0.7075733292765083 | 0.4262828237890648 | T | T | T |
| 0.9169929654200935 | 0.2084179333414323 | 0.4264908036066065 | T | T | T |
| 0.9157795174307001 | 0.7087988203706813 | 0.4266835331181625 | T | T | T |

|                    |                    |                    |   |   |   |
|--------------------|--------------------|--------------------|---|---|---|
| 0.0842468209935430 | 0.0196506304303710 | 0.4419562555785553 | T | T | T |
| 0.0819562112118087 | 0.5200528627041249 | 0.4422607933112026 | T | T | T |
| 0.4180277955891994 | 0.0196150446248353 | 0.4419869967076991 | T | T | T |
| 0.4144618062969897 | 0.5193027276753202 | 0.4416468905123442 | T | T | T |
| 0.7514286575289325 | 0.0197073970254580 | 0.4419652792463920 | T | T | T |
| 0.7491207871214487 | 0.5195023827966269 | 0.4417895233801185 | T | T | T |
| 0.0833333129999971 | 0.3437488080000008 | 0.4914442899999969 | F | F | F |
| 0.0833333129999971 | 0.8437487779999984 | 0.4914442899999969 | F | F | F |
| 0.4166666870000029 | 0.3437488080000008 | 0.4914442899999969 | F | F | F |
| 0.4166666870000029 | 0.8437487779999984 | 0.4914442899999969 | F | F | F |
| 0.7500000000000000 | 0.3437488080000008 | 0.4914442899999969 | F | F | F |
| 0.7500000000000000 | 0.8437487779999984 | 0.4914442899999969 | F | F | F |
| 0.2500000000000000 | 0.1562512220000016 | 0.5085557100000031 | F | F | F |
| 0.2500000000000000 | 0.6562511919999992 | 0.5085557100000031 | F | F | F |
| 0.5833333129999971 | 0.1562512220000016 | 0.5085557100000031 | F | F | F |
| 0.5833333129999971 | 0.6562511919999992 | 0.5085557100000031 | F | F | F |
| 0.9166666870000029 | 0.1562512220000016 | 0.5085557100000031 | F | F | F |
| 0.9166666870000029 | 0.6562511919999992 | 0.5085557100000031 | F | F | F |
| 0.2508792128785512 | 0.4804976172033731 | 0.5582104766198815 | T | T | T |
| 0.2485713424710675 | 0.9802926029745420 | 0.5580347207536080 | T | T | T |
| 0.5855381937030103 | 0.4806972723246798 | 0.5583531094876557 | T | T | T |
| 0.5819722044108007 | 0.9803849553751648 | 0.5580130032923009 | T | T | T |
| 0.9180437887881913 | 0.4799471372958751 | 0.5577392066887974 | T | T | T |
| 0.9157531790064570 | 0.9803493695696290 | 0.5580437444214449 | T | T | T |
| 0.0842204825692999 | 0.2912011796293187 | 0.5733164668818377 | T | T | T |
| 0.0830070345799066 | 0.7915820666585677 | 0.5735091963933935 | T | T | T |
| 0.4172440526214606 | 0.2924266707234917 | 0.5737171762109352 | T | T | T |
| 0.4160017205154415 | 0.7912446126580592 | 0.5731782813634657 | T | T | T |
| 0.7505543503345750 | 0.2915855538177359 | 0.5734506261673137 | T | T | T |
| 0.7492487245863607 | 0.7915735178845883 | 0.5731424832194274 | T | T | T |
| 0.0826964768021896 | 0.1168097392334995 | 0.6239562762534663 | T | T | T |
| 0.0756505907967523 | 0.6149949650517076 | 0.6229969977918602 | T | T | T |
| 0.4128844877144583 | 0.1149078701310174 | 0.6245842068816093 | T | T | T |
| 0.9153141343767991 | 0.9017372495475450 | 0.6384453484053472 | T | T | T |
| 0.7515329432153918 | 0.1157430724360969 | 0.6242856237648957 | T | T | T |
| 0.5816218115540631 | 0.9008242727292868 | 0.6382763819930579 | T | T | T |
| 0.9190902235267352 | 0.3996757387472307 | 0.6381908983685096 | T | T | T |
| 0.2480719783733135 | 0.9011157615264777 | 0.6384168596682391 | T | T | T |
| 0.4204175771996737 | 0.6166402730229172 | 0.6240891948443518 | T | T | T |
| 0.7614346484501778 | 0.6158121460298963 | 0.6239649060247590 | T | T | T |
| 0.2496115694360503 | 0.4114025976007899 | 0.6375978144022952 | T | T | T |
| 0.5865069870271753 | 0.4127059229105962 | 0.6376375722729060 | T | T | T |
| 0.5840694628252862 | 0.3282594782410944 | 0.6689356371522126 | T | T | T |
| 0.2473706690013877 | 0.4355238106489605 | 0.6806034530344225 | T | T | T |
